# Supplementary material
Source: HighWire-hosted journal article supplement (https://drc.bmj.com/content/suppl/2021/10/04/9.1.e002146)
Supplement: bmjdrc-2021-002146supp001_data_supplement.pdf [file bmjdrc-2021-002146supp001_data_supplement.pdf]

**Supplementary Table 1.** Read codes used to identify hypertension.

| <b>Read Code</b> | <b>Description</b>                               |
|------------------|--------------------------------------------------|
| 6146200          | Hypertension induced by oral contraceptive pill  |
| 662..12          | Hypertension monitoring                          |
| 6627.00          | Good hypertension control                        |
| 6628.00          | Poor hypertension control                        |
| 6629.00          | Hypertension:follow-up default                   |
| 662F.00          | Hypertension treatm. started                     |
| 662G.00          | Hypertensive treatm.changed                      |
| 662H.00          | Hypertension treatm.stopped                      |
| 662O.00          | On treatment for hypertension                    |
| 662P.00          | Hypertension monitoring                          |
| 662b.00          | Moderate hypertension control                    |
| 662c.00          | Hypertension six month review                    |
| 662d.00          | Hypertension annual review                       |
| 8CR4.00          | Hypertension clinical management plan            |
| 8I3N.00          | Hypertension treatment refused                   |
| 9N03.00          | Seen in hypertension clinic                      |
| 9N1y200          | Seen in hypertension clinic                      |
| 9N4L.00          | DNA - Did not attend hypertension clinic         |
| 9OI1.00          | Attends hypertension monitor.                    |
| 9OI2.00          | Refuses hypertension monitor.                    |
| 9OI4.00          | Hypertens.monitor. 1st letter                    |
| 9OI5.00          | Hypertens.monitor 2nd letter                     |
| 9OI6.00          | Hypertens.monitor 3rd letter                     |
| 9OI7.00          | Hypertens.monitor verbal inv.                    |
| 9OI8.00          | Hypertens.monitor phone invite                   |
| 9OI9.00          | Hypertens.monitor deleted                        |
| 9OIA.00          | Hypertension monitor.chk done                    |
| 9OIA.11          | Hypertension monitored                           |
| 9OIZ.00          | Hypertens.monitoring admin.NOS                   |
| G2...00          | Hypertensive disease                             |
| G2...11          | BP - hypertensive disease                        |
| G20..00          | Essential hypertension                           |
| G20..11          | High blood pressure                              |
| G200.00          | Malignant essential hypertension                 |
| G201.00          | Benign essential hypertension                    |
| G202.00          | Systolic hypertension                            |
| G20z.00          | Essential hypertension NOS                       |
| G20z.11          | Hypertension NOS                                 |
| G21..00          | Hypertensive heart disease                       |
| G210.00          | Malignant hypertensive heart disease             |
| G210000          | Malignant hypertensive heart disease without CCF |
| G210100          | Malignant hypertensive heart disease with CCF    |
| G210z00          | Malignant hypertensive heart disease NOS         |

| Read Code | Description                                                 |
|-----------|-------------------------------------------------------------|
| G211.00   | Benign hypertensive heart disease                           |
| G211000   | Benign hypertensive heart disease without CCF               |
| G211100   | Benign hypertensive heart disease with CCF                  |
| G211z00   | Benign hypertensive heart disease NOS                       |
| G21z.00   | Hypertensive heart disease NOS                              |
| G21z000   | Hypertensive heart disease NOS without CCF                  |
| G21z011   | Cardiomegaly - hypertensive                                 |
| G21z100   | Hypertensive heart disease NOS with CCF                     |
| G21zz00   | Hypertensive heart disease NOS                              |
| G22..00   | Hypertensive renal disease                                  |
| G220.00   | Malignant hypertensive renal disease                        |
| G221.00   | Benign hypertensive renal disease                           |
| G222.00   | Hypertensive renal disease with renal failure               |
| G22z.00   | Hypertensive renal disease NOS                              |
| G22z.11   | Renal hypertension                                          |
| G23..00   | Hypertensive heart and renal disease                        |
| G230.00   | Malignant hypertensive heart and renal disease              |
| G231.00   | Benign hypertensive heart and renal disease                 |
| G232.00   | Hypertensive heart&renal dis wth (congestive) heart failure |
| G233.00   | Hypertensive heart and renal disease with renal failure     |
| G23z.00   | Hypertensive heart and renal disease NOS                    |
| G24..00   | Secondary hypertension                                      |
| G240.00   | Secondary malignant hypertension                            |
| G240000   | Secondary malignant renovascular hypertension               |
| G240z00   | Secondary malignant hypertension NOS                        |
| G241.00   | Secondary benign hypertension                               |
| G241000   | Secondary benign renovascular hypertension                  |
| G241z00   | Secondary benign hypertension NOS                           |
| G244.00   | Hypertension secondary to endocrine disorders               |
| G24z.00   | Secondary hypertension NOS                                  |
| G24z000   | Secondary renovascular hypertension NOS                     |
| G24z100   | Hypertension secondary to drug                              |
| G24zz00   | Secondary hypertension NOS                                  |
| G2y..00   | Other specified hypertensive disease                        |
| G2z..00   | Hypertensive disease NOS                                    |
| G672.11   | Hypertensive crisis                                         |
| Gyu2.00   | [X]Hypertensive diseases                                    |
| Gyu2000   | [X]Other secondary hypertension                             |
| Gyu2100   | [X]Hypertension secondary to other renal disorders          |

**Supplementary Table 2.** Read codes used to identify hyperlipidaemia.

| <b>Read Code</b> | <b>Description</b>                                       |
|------------------|----------------------------------------------------------|
| 1442.00          | H/O: raised blood lipids                                 |
| 44O4.00          | Serum lipids high                                        |
| 44O6.00          | Lipids abnormal                                          |
| 44P3.00          | Serum cholesterol raised                                 |
| 44P4.00          | Serum cholesterol very high                              |
| 44Q3.00          | Serum triglycerides raised                               |
| 8B28.00          | Lipid lowering therapy                                   |
| 8BAG000          | Cholesterol reduction programme - invited                |
| 8BAG100          | Cholesterol reduction program - attended                 |
| 8BAG200          | Cholesterol reduction program - declined                 |
| 8CA4700          | Patient advised re low cholesterol diet                  |
| 8HT1.00          | Referral to lipid clinic                                 |
| 9N0I.00          | Seen in lipid clinic                                     |
| 9N0J.00          | Seen in cholesterol clinic                               |
| C320000          | Familial hypercholesterolaemia                           |
| C320.00          | Pure hypercholesterolaemia                               |
| C32..00          | Disorders of lipid metabolism                            |
| C320100          | Hyperbetalipoproteinaemia                                |
| C320.11          | Familial hypercholesterolaemia                           |
| C320.12          | Fredrickson type IIa lipidaemia                          |
| C320.13          | Low density lipoproteinaemia                             |
| C320200          | Hyperlipidaemia, group A                                 |
| C320300          | Low-density-lipoprotein-type (LDL) hyperlipoproteinaemia |
| C320400          | Fredrickson's hyperlipoproteinaemia, type IIa            |
| C320y00          | Other specified pure hypercholesterolaemia               |
| C320z00          | Pure hypercholesterolaemia NOS                           |
| C321.00          | Pure hyperglyceridaemia                                  |
| C321.11          | Fredrickson type IV lipidaemia                           |
| C321.12          | Very low density lipoprotinaemia                         |
| C32..11          | Disorder of cholesterol metabolism                       |
| C322.00          | Mixed hyperlipidaemia                                    |
| C322.11          | Fredrickson type IIb lipidaemia                          |
| C322.12          | Fredrickson type III lipidaemia                          |
| C322.13          | Xanthoma tuberosum                                       |
| C323.00          | Hyperchylomicronaemia                                    |
| C323.11          | Burger - Grute syndrome                                  |
| C323.12          | Fredrickson type I lipaemia                              |
| C323.13          | Fredrickson type V lipaemia                              |
| C324.00          | Hyperlipidaemia NOS                                      |
| Cyu8D00          | [X]Other hyperlipidaemia                                 |
| ZV65317          | [V]Dietary surveillance in hypercholesterolaemia         |
| 13B3.00          | Low cholesterol diet                                     |

**Supplementary Table 3.** Read codes used to identify heart failure.

| <b>Read Code</b> | <b>Description</b>                                          |
|------------------|-------------------------------------------------------------|
| 14A6.00          | H/O: heart failure                                          |
| 14AM.00          | H/O: Heart failure in last year                             |
| 1O1..00          | Heart failure confirmed                                     |
| 388D.00          | New York Heart Assoc classification heart failure symptoms  |
| 662f.00          | New York Heart Association classification - class I         |
| 662g.00          | New York Heart Association classification - class II        |
| 662h.00          | New York Heart Association classification - class III       |
| 662i.00          | New York Heart Association classification - class IV        |
| 662p.00          | Heart failure 6 month review                                |
| 662T.00          | Congestive heart failure monitoring                         |
| 662W.00          | Heart failure annual review                                 |
| 679X.00          | Heart failure education                                     |
| 67D4.00          | Heart failure information given to patient                  |
| 8B29.00          | Cardiac failure therapy                                     |
| 8CL3.00          | Heart failure care plan discussed with patient              |
| 8H2S.00          | Admit heart failure emergency                               |
| 8HBE.00          | Heart failure follow-up                                     |
| 8Hg8.00          | Discharge from practice nurse heart failure clinic          |
| 8HHb.00          | Referral to heart failure nurse                             |
| 8HHz.00          | Referral to heart failure exercise programme                |
| 8Hk0.00          | Referred to heart failure education group                   |
| 8HTL.00          | Referral to heart failure clinic                            |
| 9N0k.00          | Seen in heart failure clinic                                |
| 9N2p.00          | Seen by community heart failure nurse                       |
| 9N4s.00          | Did not attend practice nurse heart failure clinic          |
| 9N6T.00          | Referred by heart failure nurse specialist                  |
| 9Or..00          | Heart failure monitoring administration                     |
| 9Or0.00          | Heart failure review completed                              |
| 9Or1.00          | Heart failure monitoring telephone invite                   |
| 9Or2.00          | Heart failure monitoring verbal invite                      |
| 9Or3.00          | Heart failure monitoring first letter                       |
| 9Or4.00          | Heart failure monitoring second letter                      |
| 9Or5.00          | Heart failure monitoring third letter                       |
| G232.00          | Hypertensive heart&renal dis wth (congestive) heart failure |
| G234.00          | Hyperten heart&renal dis+both(congestv)heart and renal fail |
| G1yz100          | Rheumatic left ventricular failure                          |
| G5y4z00          | Post cardiac operation heart failure NOS                    |
| G5yy900          | Left ventricular systolic dysfunction                       |
| G5yyA00          | Left ventricular diastolic dysfunction                      |
| L09y200          | Cardiac failure following abortive pregnancy                |
| Q48y100          | Congenital cardiac failure                                  |
| Q490.00          | Neonatal cardiac failure                                    |
| SP08400          | Heart transplant failure and rejection                      |

| <b>Read Code</b> | <b>Description</b>                              |
|------------------|-------------------------------------------------|
| SP08500          | Heart-lung transplant failure and rejection     |
| SP11100          | Cardiac insufficiency as a complication of care |
| SP11111          | Heart failure as a complication of care         |

**Supplementary Table 4.** Read codes used to identify atrial fibrillation.

| <b>Read Code</b> | <b>Description</b>                                           |
|------------------|--------------------------------------------------------------|
| 14AN.00          | H/O: atrial fibrillation                                     |
| 14AR.00          | History of atrial flutter                                    |
| 212R.00          | Atrial fibrillation resolved                                 |
| 3272.00          | ECG: atrial fibrillation                                     |
| 3273.00          | ECG: atrial flutter                                          |
| 3274.00          | ECG: paroxysmal atrial tachy.                                |
| 662S.00          | Atrial fibrillation monitoring                               |
| 6A9..00          | Atrial fibrillation annual review                            |
| 7936A00          | Implant intravenous pacemaker for atrial fibrillation        |
| 793M100          | Perc transluminal ablation of atrial wall for atrial flutter |
| 793M300          | Perc translum ablat conduct sys heart for atrial flutter NEC |
| 8CMW200          | Atrial fibrillation care pathway                             |
| 8HTy.00          | Referral to atrial fibrillation clinic                       |
| 8OAD.00          | Provision of written information about atrial fibrillation   |
| 9Os..00          | Atrial fibrillation monitoring administration                |
| 9Os0.00          | Atrial fibrillation monitoring first letter                  |
| 9Os1.00          | Atrial fibrillation monitoring second letter                 |
| 9Os2.00          | Atrial fibrillation monitoring third letter                  |
| 9Os3.00          | Atrial fibrillation monitoring verbal invite                 |
| 9Os4.00          | Atrial fibrillation monitoring telephone invite              |
| 9hF..00          | Exception reporting: atrial fibrillation quality indicators  |
| 9hF0.00          | Except from atr fib quality indicators: Patient unsuitable   |
| 9hF1.00          | Excepted from atrial fibrillation qual indic: Inform dissent |
| G570.00          | Paroxysmal supraventricular tachycardia                      |
| G570000          | Paroxysmal atrial tachycardia                                |
| G573.00          | Atrial fibrillation and flutter                              |
| G573000          | Atrial fibrillation                                          |
| G573100          | Atrial flutter                                               |
| G573200          | Paroxysmal atrial fibrillation                               |
| G573300          | Non-rheumatic atrial fibrillation                            |
| G573400          | Permanent atrial fibrillation                                |
| G573500          | Persistent atrial fibrillation                               |
| G573600          | Paroxysmal atrial flutter                                    |
| G573700          | Chronic atrial fibrillation                                  |
| G573800          | Typical atrial flutter                                       |
| G573900          | Atypical atrial flutter                                      |
| G573z00          | Atrial fibrillation and flutter NOS                          |

**Supplementary Table 5.** Read codes used to identify ischaemic heart disease.

| <b>Read Code</b> | <b>Description</b>                                           |
|------------------|--------------------------------------------------------------|
| 14A3.00          | H/O: myocardial infarct <60                                  |
| 14A4.00          | H/O: myocardial infarct >60                                  |
| 14A5.00          | H/O: angina pectoris                                         |
| 14AJ.00          | H/O: Angina in last year                                     |
| 14AL.00          | H/O: Treatment for ischaemic heart disease                   |
| 322..00          | ECG: myocardial ischaemia                                    |
| 3222.00          | ECG:shows myocardial ischaemia                               |
| 322Z.00          | ECG: myocardial ischaemia NOS                                |
| 3232.00          | ECG: old myocardial infarction                               |
| 3235.00          | ECG: subendocardial infarct                                  |
| 323Z.00          | ECG: myocardial infarct NOS                                  |
| 3889.00          | Euroscore for angina                                         |
| 388E.00          | Canadian Cardiovascular Society classification of angina     |
| 388F.00          | Cardiovascular Limitations and Symptoms Profile angina score |
| 662K.00          | Angina control                                               |
| 662K000          | Angina control - good                                        |
| 662K100          | Angina control - poor                                        |
| 662K200          | Angina control - improving                                   |
| 662K300          | Angina control - worsening                                   |
| 662Kz00          | Angina control NOS                                           |
| 68B2.00          | Ischaemic heart disease screen                               |
| 790H300          | Revascularisation of wall of heart                           |
| 792..00          | Coronary artery operations                                   |
| 792..11          | Coronary artery bypass graft operations                      |
| 7920.00          | Saphenous vein graft replacement of coronary artery          |
| 7920.11          | Saphenous vein graft bypass of coronary artery               |
| 7920000          | Saphenous vein graft replacement of one coronary artery      |
| 7920100          | Saphenous vein graft replacement of two coronary arteries    |
| 7920200          | Saphenous vein graft replacement of three coronary arteries  |
| 7920300          | Saphenous vein graft replacement of four+ coronary arteries  |
| 7920y00          | Saphenous vein graft replacement of coronary artery OS       |
| 7920z00          | Saphenous vein graft replacement coronary artery NOS         |
| 7921.00          | Other autograft replacement of coronary artery               |
| 7921.11          | Other autograft bypass of coronary artery                    |
| 7921000          | Autograft replacement of one coronary artery NEC             |
| 7921100          | Autograft replacement of two coronary arteries NEC           |
| 7921200          | Autograft replacement of three coronary arteries NEC         |
| 7921300          | Autograft replacement of four of more coronary arteries NEC  |
| 7921y00          | Other autograft replacement of coronary artery OS            |
| 7921z00          | Other autograft replacement of coronary artery NOS           |
| 7922.00          | Allograft replacement of coronary artery                     |
| 7922.11          | Allograft bypass of coronary artery                          |
| 7922000          | Allograft replacement of one coronary artery                 |

| Read Code | Description                                                  |
|-----------|--------------------------------------------------------------|
| 7922100   | Allograft replacement of two coronary arteries               |
| 7922200   | Allograft replacement of three coronary arteries             |
| 7922300   | Allograft replacement of four or more coronary arteries      |
| 7922y00   | Other specified allograft replacement of coronary artery     |
| 7922z00   | Allograft replacement of coronary artery NOS                 |
| 7923.00   | Prosthetic replacement of coronary artery                    |
| 7923.11   | Prosthetic bypass of coronary artery                         |
| 7923000   | Prosthetic replacement of one coronary artery                |
| 7923100   | Prosthetic replacement of two coronary arteries              |
| 7923200   | Prosthetic replacement of three coronary arteries            |
| 7923300   | Prosthetic replacement of four or more coronary arteries     |
| 7923y00   | Other specified prosthetic replacement of coronary artery    |
| 7923z00   | Prosthetic replacement of coronary artery NOS                |
| 7924.00   | Revision of bypass for coronary artery                       |
| 7924000   | Revision of bypass for one coronary artery                   |
| 7924100   | Revision of bypass for two coronary arteries                 |
| 7924200   | Revision of bypass for three coronary arteries               |
| 7924300   | Revision of bypass for four or more coronary arteries        |
| 7924400   | Revision of connection of thoracic artery to coronary artery |
| 7924y00   | Other specified revision of bypass for coronary artery       |
| 7924z00   | Revision of bypass for coronary artery NOS                   |
| 7925.00   | Connection of mammary artery to coronary artery              |
| 7925.11   | Creation of bypass from mammary artery to coronary artery    |
| 7925000   | Double anastomosis of mammary arteries to coronary arteries  |
| 7925100   | Double implant of mammary arteries into coronary arteries    |
| 7925200   | Single anast mammary art to left ant descend coronary art    |
| 7925300   | Single anastomosis of mammary artery to coronary artery NEC  |
| 7925400   | Single implantation of mammary artery into coronary artery   |
| 7925y00   | Connection of mammary artery to coronary artery OS           |
| 7925z00   | Connection of mammary artery to coronary artery NOS          |
| 7926.00   | Connection of other thoracic artery to coronary artery       |
| 7926000   | Double anastom thoracic arteries to coronary arteries NEC    |
| 7926100   | Double implant thoracic arteries into coronary arteries NEC  |
| 7926200   | Single anastomosis of thoracic artery to coronary artery NEC |
| 7926300   | Single implantation thoracic artery into coronary artery NEC |
| 7926y00   | Connection of other thoracic artery to coronary artery OS    |
| 7926z00   | Connection of other thoracic artery to coronary artery NOS   |
| 7927.00   | Other open operations on coronary artery                     |
| 7927000   | Repair of arteriovenous fistula of coronary artery           |
| 7927100   | Repair of aneurysm of coronary artery                        |
| 7927200   | Transection of muscle bridge of coronary artery              |
| 7927300   | Transposition of coronary artery NEC                         |
| 7927400   | Exploration of coronary artery                               |
| 7927500   | Open angioplasty of coronary artery                          |
| 7927y00   | Other specified other open operation on coronary artery      |



| Read Code | Description                                                  |
|-----------|--------------------------------------------------------------|
| 7927z00   | Other open operation on coronary artery NOS                  |
| 7928.00   | Transluminal balloon angioplasty of coronary artery          |
| 7928.11   | Percutaneous balloon coronary angioplasty                    |
| 7928000   | Percut transluminal balloon angioplasty one coronary artery  |
| 7928100   | Percut translum balloon angioplasty mult coronary arteries   |
| 7928200   | Percut translum balloon angioplasty bypass graft coronary a  |
| 7928y00   | Transluminal balloon angioplasty of coronary artery OS       |
| 7928z00   | Transluminal balloon angioplasty of coronary artery NOS      |
| 7929.00   | Other therapeutic transluminal operations on coronary artery |
| 7929000   | Percutaneous transluminal laser coronary angioplasty         |
| 7929100   | Percut transluminal coronary thrombolysis with streptokinase |
| 7929111   | Percut translum coronary thrombolytic therapy- streptokinase |
| 7929200   | Percut translum inject therap subst to coronary artery NEC   |
| 7929300   | Rotary blade coronary angioplasty                            |
| 7929400   | Insertion of coronary artery stent                           |
| 7929y00   | Other therapeutic transluminal op on coronary artery OS      |
| 7929z00   | Other therapeutic transluminal op on coronary artery NOS     |
| 792B.00   | Repair of coronary artery NEC                                |
| 792B000   | Endarterectomy of coronary artery NEC                        |
| 792By00   | Other specified repair of coronary artery                    |
| 792Bz00   | Repair of coronary artery NOS                                |
| 792C.00   | Other replacement of coronary artery                         |
| 792C000   | Replacement of coronary arteries using multiple methods      |
| 792Cy00   | Other specified replacement of coronary artery               |
| 792Cz00   | Replacement of coronary artery NOS                           |
| 792D.00   | Other bypass of coronary artery                              |
| 792Dy00   | Other specified other bypass of coronary artery              |
| 792Dz00   | Other bypass of coronary artery NOS                          |
| 792y.00   | Other specified operations on coronary artery                |
| 792z.00   | Coronary artery operations NOS                               |
| 889A.00   | Diab mellit insulin-glucose infus acute myocardial infarct   |
| 88A8.00   | Thrombolytic therapy                                         |
| 8B27.00   | Antianginal therapy                                          |
| G5y2.00   | Cardiovascular arteriosclerosis unspecified                  |
| Gyu3000   | [X]Other forms of angina pectoris                            |
| Gyu3100   | [X]Other current complicatns following acute myocard infarct |
| Gyu3200   | [X]Other forms of acute ischaemic heart disease              |
| Gyu3300   | [X]Other forms of chronic ischaemic heart disease            |
| Gyu3400   | [X]Acute transmural myocardial infarction of unspecif site   |
| Q494.00   | Transient myocardial ischaemia of newborn                    |
| SP00300   | Mechanical complication of coronary bypass                   |
| ZR37.00   | Canadian Cardiovascular Society classification of angina     |
| ZR3P.00   | CLASP angina score                                           |
| ZR3P.11   | CLASP angina score                                           |
| ZRB1.00   | Euroscore for angina                                         |

| Read Code | Description                                             |
|-----------|---------------------------------------------------------|
| ZV45700   | [V]Presence of aortocoronary bypass graft               |
| ZV45800   | [V]Presence of coronary angioplasty implant and graft   |
| ZV45K00   | [V]Presence of coronary artery bypass graft             |
| ZV45K11   | [V]Presence of coronary artery bypass graft - CABG      |
| ZV45L00   | [V]Status following coronary angioplasty NOS            |
| G3...00   | Ischaemic heart disease                                 |
| G3...11   | Arteriosclerotic heart disease                          |
| G3...12   | Atherosclerotic heart disease                           |
| G3...13   | IHD - Ischaemic heart disease                           |
| G30..00   | Acute myocardial infarction                             |
| G30..11   | Attack - heart                                          |
| G30..12   | Coronary thrombosis                                     |
| G30..13   | Cardiac rupture following myocardial infarction (MI)    |
| G30..14   | Heart attack                                            |
| G30..15   | MI - acute myocardial infarction                        |
| G30..16   | Thrombosis - coronary                                   |
| G30..17   | Silent myocardial infarction                            |
| G300.00   | Acute anterolateral infarction                          |
| G301.00   | Other specified anterior myocardial infarction          |
| G301000   | Acute anteroapical infarction                           |
| G301100   | Acute anteroseptal infarction                           |
| G301z00   | Anterior myocardial infarction NOS                      |
| G302.00   | Acute inferolateral infarction                          |
| G303.00   | Acute inferoposterior infarction                        |
| G304.00   | Posterior myocardial infarction NOS                     |
| G305.00   | Lateral myocardial infarction NOS                       |
| G306.00   | True posterior myocardial infarction                    |
| G307.00   | Acute subendocardial infarction                         |
| G307000   | Acute non-Q wave infarction                             |
| G307100   | Acute non-ST segment elevation myocardial infarction    |
| G308.00   | Inferior myocardial infarction NOS                      |
| G309.00   | Acute Q-wave infarct                                    |
| G30A.00   | Mural thrombosis                                        |
| G30B.00   | Acute posterolateral myocardial infarction              |
| G30X.00   | Acute transmural myocardial infarction of unspecif site |
| G30X000   | Acute ST segment elevation myocardial infarction        |
| G30y.00   | Other acute myocardial infarction                       |
| G30y000   | Acute atrial infarction                                 |
| G30y100   | Acute papillary muscle infarction                       |
| G30y200   | Acute septal infarction                                 |
| G30yz00   | Other acute myocardial infarction NOS                   |
| G30z.00   | Acute myocardial infarction NOS                         |
| G31..00   | Other acute and subacute ischaemic heart disease        |
| G310.00   | Postmyocardial infarction syndrome                      |
| G310.11   | Dressler's syndrome                                     |

| Read Code | Description                                                |
|-----------|------------------------------------------------------------|
| G311.00   | Preinfarction syndrome                                     |
| G311.11   | Crescendo angina                                           |
| G311.12   | Impending infarction                                       |
| G311.13   | Unstable angina                                            |
| G311.14   | Angina at rest                                             |
| G311000   | Myocardial infarction aborted                              |
| G311011   | MI - myocardial infarction aborted                         |
| G311100   | Unstable angina                                            |
| G311200   | Angina at rest                                             |
| G311300   | Refractory angina                                          |
| G311400   | Worsening angina                                           |
| G311500   | Acute coronary syndrome                                    |
| G311z00   | Preinfarction syndrome NOS                                 |
| G312.00   | Coronary thrombosis not resulting in myocardial infarction |
| G31y.00   | Other acute and subacute ischaemic heart disease           |
| G31y000   | Acute coronary insufficiency                               |
| G31y100   | Microinfarction of heart                                   |
| G31y200   | Subendocardial ischaemia                                   |
| G31y300   | Transient myocardial ischaemia                             |
| G31yz00   | Other acute and subacute ischaemic heart disease NOS       |
| G32..00   | Old myocardial infarction                                  |
| G32..11   | Healed myocardial infarction                               |
| G32..12   | Personal history of myocardial infarction                  |
| G33..00   | Angina pectoris                                            |
| G330.00   | Angina decubitus                                           |
| G330000   | Nocturnal angina                                           |
| G330z00   | Angina decubitus NOS                                       |
| G331.00   | Prinzmetal's angina                                        |
| G331.11   | Variant angina pectoris                                    |
| G332.00   | Coronary artery spasm                                      |
| G33z.00   | Angina pectoris NOS                                        |
| G33z000   | Status anginosus                                           |
| G33z100   | Stenocardia                                                |
| G33z200   | Syncope anginosa                                           |
| G33z300   | Angina on effort                                           |
| G33z400   | Ischaemic chest pain                                       |
| G33z500   | Post infarct angina                                        |
| G33z600   | New onset angina                                           |
| G33z700   | Stable angina                                              |
| G33zz00   | Angina pectoris NOS                                        |
| G34..00   | Other chronic ischaemic heart disease                      |
| G340.00   | Coronary atherosclerosis                                   |
| G340.11   | Triple vessel disease of the heart                         |
| G340.12   | Coronary artery disease                                    |
| G340000   | Single coronary vessel disease                             |

| Read Code | Description                                                                |
|-----------|----------------------------------------------------------------------------|
| G340100   | Double coronary vessel disease                                             |
| G341.00   | Aneurysm of heart                                                          |
| G341.11   | Cardiac aneurysm                                                           |
| G341000   | Ventricular cardiac aneurysm                                               |
| G341100   | Other cardiac wall aneurysm                                                |
| G341111   | Mural cardiac aneurysm                                                     |
| G341200   | Aneurysm of coronary vessels                                               |
| G341300   | Acquired atrioventricular fistula of heart                                 |
| G341z00   | Aneurysm of heart NOS                                                      |
| G342.00   | Atherosclerotic cardiovascular disease                                     |
| G343.00   | Ischaemic cardiomyopathy                                                   |
| G344.00   | Silent myocardial ischaemia                                                |
| G34y.00   | Other specified chronic ischaemic heart disease                            |
| G34y000   | Chronic coronary insufficiency                                             |
| G34y100   | Chronic myocardial ischaemia                                               |
| G34yz00   | Other specified chronic ischaemic heart disease NOS                        |
| G34z.00   | Other chronic ischaemic heart disease NOS                                  |
| G34z000   | Asymptomatic coronary heart disease                                        |
| G35..00   | Subsequent myocardial infarction                                           |
| G350.00   | Subsequent myocardial infarction of anterior wall                          |
| G351.00   | Subsequent myocardial infarction of inferior wall                          |
| G353.00   | Subsequent myocardial infarction of other sites                            |
| G35X.00   | Subsequent myocardial infarction of unspecified site                       |
| G36..00   | Certain current complication follow acute myocardial infarct               |
| G360.00   | Haemopericardium/current comp follow acute myocardial infarct              |
| G361.00   | Atrial septal defect/curr comp follow acute myocardial infarct             |
| G362.00   | Ventricular septal defect/curr comp follow acute myocardial infarct        |
| G363.00   | Rupture cardiac wall without haemopericardium/current comp follow acute MI |
| G364.00   | Rupture chordae tendinae/current comp follow acute myocardial infarct      |
| G365.00   | Rupture papillary muscle/current comp follow acute myocardial infarct      |
| G366.00   | Thrombosis atrium, auricle and ventricle/current comp follow acute MI      |
| G37..00   | Cardiac syndrome X                                                         |
| G38..00   | Postoperative myocardial infarction                                        |
| G380.00   | Postoperative transmural myocardial infarction anterior wall               |
| G381.00   | Postoperative transmural myocardial infarction inferior wall               |
| G382.00   | Postoperative transmural myocardial infarction other sites                 |
| G383.00   | Postoperative transmural myocardial infarction unspecified site            |
| G384.00   | Postoperative subendocardial myocardial infarction                         |
| G38z.00   | Postoperative myocardial infarction, unspecified                           |
| G39..00   | Coronary microvascular disease                                             |
| G3y..00   | Other specified ischaemic heart disease                                    |
| G3z..00   | Ischaemic heart disease NOS                                                |

**Supplementary Table 6.** Read codes used to identify cerebrovascular disease.

| Read Code | Description                                                  |
|-----------|--------------------------------------------------------------|
| 1477.00   | H/O: cerebrovascular disease                                 |
| 14A7.12   | H/O: stroke                                                  |
| 14AF.00   | H/O sub-arachnoid haemorrhage                                |
| A270300   | Listerial cerebral arteritis                                 |
| F11x200   | Cerebral degeneration due to cerebrovascular disease         |
| F285.00   | Cerebral oedema                                              |
| F404500   | Intra-ocular haemorrhage                                     |
| Gyu6.00   | [X]Cerebrovascular diseases                                  |
| Gyu6000   | [X]Subarachnoid haemorrhage from other intracranial arteries |
| Gyu6100   | [X]Other subarachnoid haemorrhage                            |
| Gyu6200   | [X]Other intracerebral haemorrhage                           |
| Gyu6400   | [X]Other cerebral infarction                                 |
| Gyu6500   | [X]Occlusion and stenosis of other precerebral arteries      |
| Gyu6700   | [X]Other specified cerebrovascular diseases                  |
| Gyu6800   | [X]Cerebral arteritis in infectious and parasitic diseases   |
| Gyu6900   | [X]Cerebral arteritis in other diseases CE                   |
| Gyu6A00   | [X]Other cerebrovascular disorders in diseases CE            |
| Gyu6B00   | [X]Sequelae of other nontraumatic intracranial haemorrhage   |
| Gyu6D00   | [X]Sequelae/other + unspecified cerebrovascular diseases     |
| Gyu6E00   | [X]Subarachnoid haemorrh from intracranial artery, unsp      |
| Gyu6F00   | [X]Intracerebral haemorrhage in hemisphere, unspecified      |
| Gyu6G00   | [X]Cereb infarct due unsp occlus/stenos precerebr arteries   |
| L417.00   | Obstetric cerebral venous thrombosis                         |
| L417000   | Cerebral venous thrombosis in pregnancy                      |
| L417100   | Cerebral venous thrombosis in the puerperium                 |
| L440.11   | CVA - cerebrovascular accident in the puerperium             |
| Q200.00   | Subdural and cerebral haemorrhage due to birth trauma        |
| Q200000   | Cerebral haemorrhage unspecified, due to birth trauma        |
| Q200011   | Intracerebral haemorrhage in fetus or newborn                |
| Q200012   | Intracranial haemorrhage in fetus or newborn                 |
| Q200700   | Cerebral haemorrhage due to birth injury                     |
| Q200y00   | Subdural or cerebral haemorrhage due to birth trauma OS      |
| Q200z00   | Subdural or cerebral haemorrhage due to birth trauma NOS     |
| Q208.00   | Cerebral oedema due to birth injury                          |
| Q313100   | Perinatal lung intra-alveolar haemorrhage                    |
| Q412.00   | Perinatal subarachnoid haemorrhage                           |
| Q412000   | Subarachnoid haemorrhage due to birth injury                 |
| Q417.00   | Intracranial nontraumatic haemorrhage of fetus and newborn   |
| Q417000   | Intracerebral (nontraumatic) haemorrhage of fet and newborn  |
| Q488.00   | Neonatal cerebral ischaemia                                  |
| Qyu5F00   | [X]Intracranial nontraumatic haemorrhage fetus newborn unsp  |
| S62..00   | Cerebral haemorrhage following injury                        |
| S62..12   | Subarachnoid haemorrhage following injury                    |

| Read Code | Description                                                   |
|-----------|---------------------------------------------------------------|
| S62..14   | Traumatic cerebral haemorrhage                                |
| S620.00   | Closed traumatic subarachnoid haemorrhage                     |
| S621.00   | Open traumatic subarachnoid haemorrhage                       |
| S627.00   | Traumatic subarachnoid haemorrhage                            |
| S62z.00   | Cerebral haemorrhage following injury NOS                     |
| S63..00   | Other cerebral haemorrhage following injury                   |
| S63z.00   | Other cerebral haemorrhage following injury NOS               |
| S642.00   | Traumatic cerebral oedema                                     |
| S642000   | Traumatic cerebral oedema without open intracranial wound     |
| S642100   | Traumatic cerebral oedema with open intracranial wound        |
| ZV12512   | [V]Personal history of cerebrovascular accident (CVA)         |
| 14A7.00   | H/O: CVA/stroke                                               |
| 14A7.11   | H/O: CVA                                                      |
| Gyu6300   | [X]Cerebrl infarctn due/unspcf occlusn or sten/cerebrl artrts |
| Gyu6600   | [X]Occlusion and stenosis of other cerebral arteries          |
| Fyu5500   | [X]Other transnt cerebral ischaemic attacks+related syndroms  |
| 14AK.00   | H/O: Stroke in last year                                      |
| 662e.00   | Stroke/CVA annual review                                      |
| 662e.11   | Stroke annual review                                          |
| 662M.00   | Stroke monitoring                                             |
| 662M100   | Stroke 6 month review                                         |
| 662M200   | Stroke initial post discharge review                          |
| Gyu6C00   | [X]Sequelae of stroke,not specfd as h'morrhage or infarction  |
| L440.12   | Stroke in the puerperium                                      |
| ZV12511   | [V]Personal history of stroke                                 |
| 7004100   | Evacuation of haematoma from temporal lobe of brain           |
| 7004200   | Evacuation of haematoma from cerebellum                       |
| 7004300   | Evacuation of intracerebral haematoma NEC                     |
| 7008200   | Aspiration of haematoma of brain tissue                       |
| 7A24400   | Open embolectomy of cerebral artery                           |
| 7A24500   | Open embolectomy of circle of Willis                          |
| 7A24600   | Open embolisation of cerebral artery                          |
| 7A24700   | Open embolisation of circle of Willis                         |
| 7A25000   | Percutaneous transluminal embolisation of cerebral artery     |
| 7A25100   | Percutaneous transluminal embolisation of circle of Willis    |
| 7A25200   | Embolisation of cerebral artery NEC                           |
| 7A25300   | Embolisation of circle of Willis NEC                          |
| 8HBJ.00   | Stroke / transient ischaemic attack referral                  |
| 8HTQ.00   | Referral to stroke clinic                                     |
| ZLEP.00   | Discharge from stroke serv                                    |
| 9Om..00   | Stroke/transient ischaemic attack monitoring administration   |
| 9Om0.00   | Stroke/transient ischaemic attack monitoring first letter     |
| 9Om1.00   | Stroke/transient ischaemic attack monitoring second letter    |
| 9Om2.00   | Stroke/transient ischaemic attack monitoring third letter     |
| 9Om3.00   | Stroke/transient ischaemic attack monitoring verbal invitati  |

| Read Code | Description                                                  |
|-----------|--------------------------------------------------------------|
| 9Om4.00   | Stroke/transient ischaemic attack monitoring telephone invte |
| G6...00   | Cerebrovascular disease                                      |
| G60..00   | Subarachnoid haemorrhage                                     |
| G600.00   | Ruptured berry aneurysm                                      |
| G601.00   | Subarachnoid haemorrhage from carotid siphon and bifurcation |
| G602.00   | Subarachnoid haemorrhage from middle cerebral artery         |
| G603.00   | Subarachnoid haemorrhage from anterior communicating artery  |
| G604.00   | Subarachnoid haemorrhage from posterior communicating artery |
| G605.00   | Subarachnoid haemorrhage from basilar artery                 |
| G606.00   | Subarachnoid haemorrhage from vertebral artery               |
| G60X.00   | Subarachnoid haemorrh from intracranial artery, unspecif     |
| G60z.00   | Subarachnoid haemorrhage NOS                                 |
| G61..00   | Intracerebral haemorrhage                                    |
| G61..11   | CVA - cerebrovascular accid due to intracerebral haemorrhage |
| G61..12   | Stroke due to intracerebral haemorrhage                      |
| G610.00   | Cortical haemorrhage                                         |
| G611.00   | Internal capsule haemorrhage                                 |
| G612.00   | Basal nucleus haemorrhage                                    |
| G613.00   | Cerebellar haemorrhage                                       |
| G614.00   | Pontine haemorrhage                                          |
| G615.00   | Bulbar haemorrhage                                           |
| G616.00   | External capsule haemorrhage                                 |
| G617.00   | Intracerebral haemorrhage, intraventricular                  |
| G618.00   | Intracerebral haemorrhage, multiple localized                |
| G619.00   | Lobar cerebral haemorrhage                                   |
| G61X.00   | Intracerebral haemorrhage in hemisphere, unspecified         |
| G61X000   | Left sided intracerebral haemorrhage, unspecified            |
| G61X100   | Right sided intracerebral haemorrhage, unspecified           |
| G61z.00   | Intracerebral haemorrhage NOS                                |
| G62..00   | Other and unspecified intracranial haemorrhage               |
| G620.00   | Extradural haemorrhage - nontraumatic                        |
| G621.00   | Subdural haemorrhage - nontraumatic                          |
| G622.00   | Subdural haematoma - nontraumatic                            |
| G623.00   | Subdural haemorrhage NOS                                     |
| G62z.00   | Intracranial haemorrhage NOS                                 |
| G63..00   | Precerebral arterial occlusion                               |
| G63..11   | Infarction - precerebral                                     |
| G63..12   | Stenosis of precerebral arteries                             |
| G630.00   | Basilar artery occlusion                                     |
| G631.00   | Carotid artery occlusion                                     |
| G631.11   | Stenosis, carotid artery                                     |
| G631.12   | Thrombosis, carotid artery                                   |
| G632.00   | Vertebral artery occlusion                                   |
| G633.00   | Multiple and bilateral precerebral arterial occlusion        |
| G634.00   | Carotid artery stenosis                                      |

| Read Code | Description                                                 |
|-----------|-------------------------------------------------------------|
| G63y.00   | Other precerebral artery occlusion                          |
| G63y000   | Cerebral infarct due to thrombosis of precerebral arteries  |
| G63y100   | Cerebral infarction due to embolism of precerebral arteries |
| G63z.00   | Precerebral artery occlusion NOS                            |
| G64..00   | Cerebral arterial occlusion                                 |
| G64..11   | CVA - cerebral artery occlusion                             |
| G64..12   | Infarction - cerebral                                       |
| G64..13   | Stroke due to cerebral arterial occlusion                   |
| G640.00   | Cerebral thrombosis                                         |
| G640000   | Cerebral infarction due to thrombosis of cerebral arteries  |
| G641.00   | Cerebral embolism                                           |
| G641.11   | Cerebral embolus                                            |
| G641000   | Cerebral infarction due to embolism of cerebral arteries    |
| G64z.00   | Cerebral infarction NOS                                     |
| G64z.11   | Brainstem infarction NOS                                    |
| G64z.12   | Cerebellar infarction                                       |
| G64z000   | Brainstem infarction                                        |
| G64z100   | Wallenberg syndrome                                         |
| G64z111   | Lateral medullary syndrome                                  |
| G64z200   | Left sided cerebral infarction                              |
| G64z300   | Right sided cerebral infarction                             |
| G64z400   | Infarction of basal ganglia                                 |
| G65..00   | Transient cerebral ischaemia                                |
| G65..11   | Drop attack                                                 |
| G65..12   | Transient ischaemic attack                                  |
| G65..13   | Vertebro-basilar insufficiency                              |
| G650.00   | Basilar artery syndrome                                     |
| G650.11   | Insufficiency - basilar artery                              |
| G651.00   | Vertebral artery syndrome                                   |
| G651000   | Vertebro-basilar artery syndrome                            |
| G652.00   | Subclavian steal syndrome                                   |
| G653.00   | Carotid artery syndrome hemispheric                         |
| G654.00   | Multiple and bilateral precerebral artery syndromes         |
| G655.00   | Transient global amnesia                                    |
| G656.00   | Vertebrobasilar insufficiency                               |
| G657.00   | Carotid territory transient ischaemic attack                |
| G65y.00   | Other transient cerebral ischaemia                          |
| G65z.00   | Transient cerebral ischaemia NOS                            |
| G65z000   | Impending cerebral ischaemia                                |
| G65z100   | Intermittent cerebral ischaemia                             |
| G65zz00   | Transient cerebral ischaemia NOS                            |
| G66..00   | Stroke and cerebrovascular accident unspecified             |
| G66..11   | CVA unspecified                                             |
| G66..12   | Stroke unspecified                                          |
| G66..13   | CVA - Cerebrovascular accident unspecified                  |



| Read Code | Description                                                  |
|-----------|--------------------------------------------------------------|
| G660.00   | Middle cerebral artery syndrome                              |
| G661.00   | Anterior cerebral artery syndrome                            |
| G662.00   | Posterior cerebral artery syndrome                           |
| G663.00   | Brain stem stroke syndrome                                   |
| G664.00   | Cerebellar stroke syndrome                                   |
| G665.00   | Pure motor lacunar syndrome                                  |
| G666.00   | Pure sensory lacunar syndrome                                |
| G667.00   | Left sided CVA                                               |
| G668.00   | Right sided CVA                                              |
| G669.00   | Cerebral palsy, not congenital or infantile, acute           |
| G67..00   | Other cerebrovascular disease                                |
| G670.00   | Cerebral atherosclerosis                                     |
| G670.11   | Precerebral atherosclerosis                                  |
| G671.00   | Generalised ischaemic cerebrovascular disease NOS            |
| G671000   | Acute cerebrovascular insufficiency NOS                      |
| G671100   | Chronic cerebral ischaemia                                   |
| G671z00   | Generalised ischaemic cerebrovascular disease NOS            |
| G672.00   | Hypertensive encephalopathy                                  |
| G672.11   | Hypertensive crisis                                          |
| G673.00   | Cerebral aneurysm, nonruptured                               |
| G673000   | Dissection of cerebral arteries, nonruptured                 |
| G673100   | Carotico-cavernous sinus fistula                             |
| G673200   | Carotid artery dissection                                    |
| G673300   | Vertebral artery dissection                                  |
| G674.00   | Cerebral arteritis                                           |
| G674000   | Cerebral amyloid angiopathy                                  |
| G675.00   | Moyamoya disease                                             |
| G676.00   | Nonpyogenic venous sinus thrombosis                          |
| G676000   | Cereb infarct due cerebral venous thrombosis, nonpyogenic    |
| G677.00   | Occlusion/stenosis cerebral arts not result cerebral infarct |
| G677000   | Occlusion and stenosis of middle cerebral artery             |
| G677100   | Occlusion and stenosis of anterior cerebral artery           |
| G677200   | Occlusion and stenosis of posterior cerebral artery          |
| G677300   | Occlusion and stenosis of cerebellar arteries                |
| G677400   | Occlusion+stenosis of multiple and bilat cerebral arteries   |
| G678.00   | Cereb autosom dominant arteriop subcort infarcts leukoenceph |
| G679.00   | Small vessel cerebrovascular disease                         |
| G67A.00   | Cerebral vein thrombosis                                     |
| G67B.00   | Reversible cerebral vasoconstriction syndrome                |
| G67B.11   | Call-Fleming syndrome                                        |
| G67y.00   | Other cerebrovascular disease OS                             |
| G67z.00   | Other cerebrovascular disease NOS                            |
| G68..00   | Late effects of cerebrovascular disease                      |
| G680.00   | Sequelae of subarachnoid haemorrhage                         |
| G681.00   | Sequelae of intracerebral haemorrhage                        |

| <b>Read Code</b> | <b>Description</b>                                        |
|------------------|-----------------------------------------------------------|
| G682.00          | Sequelae of other nontraumatic intracranial haemorrhage   |
| G683.00          | Sequelae of cerebral infarction                           |
| G68W.00          | Sequelae/other + unspecified cerebrovascular diseases     |
| G68X.00          | Sequelae of stroke,not specfd as h'morrhage or infarction |
| G6W..00          | Cereb infarct due unsp occlus/stenos precerebr arteries   |
| G6X..00          | Cerebrl infarctn due/unspcf occlusn or sten/cerebrl artr  |
| G6y..00          | Other specified cerebrovascular disease                   |
| G6z..00          | Cerebrovascular disease NOS                               |

**Supplementary Table 7.** Read codes used to identify liver disorders.

| <b>Read Code</b> | <b>Description</b>                                |
|------------------|---------------------------------------------------|
| 7L1f.00          | Compensation for liver failure                    |
| 7L1fy00          | Other specified compensation for liver failure    |
| 7L1fz00          | Compensation for liver failure NOS                |
| G820.00          | Budd - Chiari syndrome (hepatic vein thrombosis)  |
| J60..00          | Acute and subacute liver necrosis                 |
| J600.00          | Acute necrosis of liver                           |
| J600000          | Acute hepatic failure                             |
| J600011          | Acute liver failure                               |
| J600100          | Acute hepatitis - noninfective                    |
| J600200          | Acute yellow atrophy                              |
| J600z00          | Acute necrosis of liver NOS                       |
| J601.00          | Subacute necrosis of liver                        |
| J635000          | Toxic liver disease with cholestasis              |
| J601000          | Subacute hepatic failure                          |
| J601100          | Subacute hepatitis - noninfective                 |
| J601200          | Subacute yellow atrophy                           |
| J601z00          | Subacute necrosis of liver NOS                    |
| J60z.00          | Acute and subacute liver necrosis NOS             |
| J613000          | Alcoholic hepatic failure                         |
| J61y100          | Non-alcoholic fatty liver                         |
| J61y200          | Hepatosplenomegaly                                |
| J622.00          | Hepatic coma                                      |
| J625.00          | [X] Hepatic failure                               |
| J625.11          | [X] Liver failure                                 |
| J62y.11          | Hepatic failure NOS                               |
| J62y.12          | Liver failure NOS                                 |
| J62y.13          | Hepatic failure                                   |
| J634.00          | Hepatic infarction                                |
| J635200          | Toxic liver disease with acute hepatitis          |
| J635700          | Acute hepatic failure due to drugs                |
| J636.00          | Central haemorrhagic necrosis of liver            |
| J637.00          | Hepatic veno-occlusive disease                    |
| J63y.00          | Other specified liver disorder                    |
| J63y000          | Hepatoptosis                                      |
| J63yz00          | Other specified liver disorder NOS                |
| J63z.00          | Liver disorder NOS                                |
| L09y000          | Acute liver necrosis following abortive pregnancy |
| SP08600          | Liver transplant failure and rejection            |
| SP14200          | Hepatic failure as a complication of care         |
| SP14211          | Liver failure as a complication of care           |

| Read Code | Description                                                 |
|-----------|-------------------------------------------------------------|
| A704z00   | Other specified viral hepatitis with hepatic coma NOS       |
| A705000   | Viral hepatitis C without mention of hepatic coma           |
| AC8y100   | Capillaria hepatica                                         |
| G72yA00   | Aneurysm of hepatic artery                                  |
| G74y900   | Embolism and thrombosis of the hepatic artery               |
| J57yJ00   | Hepatic flexure syndrome                                    |
| J622.11   | Encephalopathy - hepatic                                    |
| J635100   | Toxic liver disease with hepatic necrosis                   |
| SP14300   | Hepatorenal syndrome as a complication of care              |
| R091000   | [D]Liver enlargement                                        |
| 25G..11   | O/E - hepatomegaly                                          |
| 7805400   | Hepatopexy                                                  |
| 7805411   | Binnie hepatopexy                                           |
| A900.15   | Congenital syphilitic hepatomegaly                          |
| PB6y100   | Congenital hepatomegaly                                     |
| R091.00   | [D]Hepatomegaly                                             |
| R091z00   | [D]Hepatomegaly NOS                                         |
| C374300   | Rotor syndrome                                              |
| Q433900   | Neonatal jaundice with Rotor's syndrome                     |
| C374.00   | Disorders of bilirubin excretion                            |
| C374000   | Crigler - Najjar syndrome                                   |
| C374100   | Dubin - Johnson syndrome                                    |
| C374200   | Gilbert's syndrome                                          |
| C374300   | Rotor syndrome                                              |
| C374y00   | Other specified congenital hyperbilirubinaemia              |
| C374z00   | Congenital hyperbilirubinaemia NOS                          |
| Cyu8J00   | [X]Other bilirubin metabolism disorders                     |
| Cyu8T00   | [X]Disorder of bilirubin metabolism, unspecified            |
| Q433y11   | Neonatal jaundice - deficiency enzyme for bilirubin conjug. |
| Q436100   | Transient neonatal hyperbilirubinaemia                      |
| Q437000   | Bilirubin encephalopathy                                    |
| C350012   | Pigmentary cirrhosis of liver                               |
| D012400   | Folate-deficiency anaemia due to liver disorders            |
| G852200   | Oesophageal varices in cirrhosis of the liver               |
| G852300   | Oesophageal varices in alcoholic cirrhosis of the liver     |
| J6...00   | Liver, biliary, pancreas + gastrointestinal diseases NEC    |
| J61..00   | Cirrhosis and chronic liver disease                         |
| J610.00   | Alcoholic fatty liver                                       |
| J612.00   | Alcoholic cirrhosis of liver                                |
| J612000   | Alcoholic fibrosis and sclerosis of liver                   |
| J613.00   | Alcoholic liver damage unspecified                          |
| J615111   | Postnecrotic cirrhosis of liver                             |

| Read Code | Description                                                  |
|-----------|--------------------------------------------------------------|
| J615z11   | Macronodular cirrhosis of liver                              |
| J615z12   | Cryptogenic cirrhosis of liver                               |
| J615z13   | Cirrhosis of liver NOS                                       |
| J61y.00   | Other non-alcoholic chronic liver disease                    |
| J61y000   | Chronic yellow liver atrophy                                 |
| J61y700   | Steatosis of liver                                           |
| J61yz00   | Other non-alcoholic chronic liver disease NOS                |
| J61z.00   | Chronic liver disease NOS                                    |
| J62..00   | Liver abscess and sequelae of chronic liver disease          |
| J620.00   | Liver abscess - excluding amoebic liver abscess              |
| J620000   | Liver abscess due to portal pyaemia                          |
| J620100   | Liver abscess due to cholangitis                             |
| J620300   | Liver abscess via umbilicus                                  |
| J620400   | Liver abscess due to direct extension                        |
| J620z00   | Liver abscess NOS                                            |
| J62y.00   | Other sequelae of chronic liver disease                      |
| J62z.00   | Liver abscess and chronic liver disease causing sequelae NOS |
| J63..00   | Other liver disorders                                        |
| J630.00   | Chronic passive liver congestion                             |
| J635.00   | Toxic liver disease                                          |
| J635000   | Toxic liver disease with cholestasis                         |
| J635600   | Toxic liver disease with fibrosis and cirrhosis of liver     |
| J635X00   | Toxic liver disease, unspecified                             |
| J63y200   | Liver cyst                                                   |
| Jyu7.00   | [X]Diseases of the liver                                     |
| Jyu7000   | [X]Toxic liver disease with other disorders of liver         |
| Jyu7100   | [X]Other and unspecified cirrhosis of liver                  |
| Jyu7200   | [X]Other specified inflammatory liver diseases               |
| Jyu7300   | [X]Other specified diseases of liver                         |
| Jyu7400   | [X]Liver disorders in infectious and parasitic diseases CE   |
| Jyu7500   | [X]Liver disorders in other diseases classified elsewhere    |
| Jyu7600   | [X]Toxic liver disease, unspecified                          |
| J612.11   | Florid cirrhosis                                             |
| J612.12   | Laennec's cirrhosis                                          |
| A053.00   | Amoebic liver abscess                                        |
| A17y400   | Tuberculosis of liver                                        |
| A392200   | Actinomycosis of liver                                       |
| A953.00   | Syphilis of liver                                            |
| AB31.11   | Coccidiomycosis liver                                        |
| AB4z600   | Histoplasmosis liver                                         |
| AB50300   | Blastomycosis liver                                          |
| AB65300   | Cryptococcosis liver                                         |

| <b>Read Code</b> | <b>Description</b>                        |
|------------------|-------------------------------------------|
| AC10.11          | Cat liver fluke infection                 |
| AC11.11          | Chinese liver fluke disease               |
| AC13.11          | Liver flukes NOS                          |
| AC13.12          | Sheep liver fluke infection               |
| AC20.00          | Liver echinococcus granulosus             |
| AC25.00          | Liver echinococcus multilocularis         |
| AC2y.00          | Liver echinococcus unspecified            |
| C310313          | Glycogenosis, type 3                      |
| AyuG400          | [X]Echinococcosis, unspecified, of liver  |
| C310412          | Andersen's disease                        |
| C310300          | Glycogenosis of liver and muscle          |
| C310311          | Glycogenosis of liver and muscle          |
| C310311          | Glycogenosis of liver and muscle          |
| J612.12          | Laennec's cirrhosis                       |
| J600100          | Acute hepatitis - noninfective            |
| J601100          | Subacute hepatitis - noninfective         |
| J611.00          | Acute alcoholic hepatitis                 |
| J614.00          | Chronic hepatitis                         |
| J614000          | Chronic persistent hepatitis              |
| J614100          | Chronic active hepatitis                  |
| J614111          | Autoimmune chronic active hepatitis       |
| J614200          | Chronic aggressive hepatitis              |
| J614300          | Recurrent hepatitis                       |
| J614400          | Chronic lobular hepatitis                 |
| J614y00          | Chronic hepatitis unspecified             |
| J614z00          | Chronic hepatitis NOS                     |
| J617.00          | Alcoholic hepatitis                       |
| J617000          | Chronic alcoholic hepatitis               |
| J631.00          | Hepatitis in viral diseases EC            |
| J631000          | Hepatitis in coxsackie virus              |
| J631100          | Hepatitis in cytomegalic inclusion virus  |
| J631200          | Hepatitis in infectious mononucleosis     |
| J631300          | Hepatitis in mumps                        |
| J631400          | Hepatitis in yellow fever                 |
| J631500          | Hepatitis in other viral disease          |
| J631600          | Hepatitis + adenovirus                    |
| J631z00          | Hepatitis in viral diseases EC NOS        |
| J632.00          | Hepatitis in other infectious diseases EC |
| J632000          | Hepatitis in malaria                      |
| J632100          | Hepatitis in late syphilis                |
| J632200          | Hepatitis in secondary syphilis           |
| J632300          | Hepatitis in toxoplasmosis                |

| Read Code | Description                                                  |
|-----------|--------------------------------------------------------------|
| J632z00   | Hepatitis in infectious diseases EC NOS                      |
| J633.00   | Hepatitis unspecified                                        |
| J633000   | Toxic hepatitis                                              |
| J633z00   | Hepatitis unspecified NOS                                    |
| J635200   | Toxic liver disease with acute hepatitis                     |
| J635300   | Toxic liver disease with chronic persistent hepatitis        |
| J635400   | Toxic liver disease with chronic lobular hepatitis           |
| J635500   | Toxic liver disease with chronic active hepatitis            |
| J63B.00   | Autoimmune hepatitis                                         |
| J63X.00   | Granulomatous hepatitis, not elsewhere classified            |
| J63y100   | Nonspecific reactive hepatitis                               |
| Jyu7700   | [X]Granulomatous hepatitis, not elsewhere classified         |
| L176500   | Viral hepatitis comp pregnancy, childbirth & the puerperium  |
| A70..00   | Viral hepatitis                                              |
| A700.00   | Viral hepatitis A with coma                                  |
| A701.00   | Viral (infectious) hepatitis A                               |
| A701.11   | Infective hepatitis                                          |
| A702.00   | Viral hepatitis B with coma                                  |
| A703.00   | Viral (serum) hepatitis B                                    |
| A704.00   | Other specified viral hepatitis with coma                    |
| A704000   | Viral hepatitis C with coma                                  |
| A704z00   | Other specified viral hepatitis with hepatic coma NOS        |
| A705.00   | Other specified viral hepatitis without coma                 |
| A705000   | Viral hepatitis C without mention of hepatic coma            |
| A705100   | Acute delta-(super)infection of hepatitis B carrier          |
| A705200   | Acute hepatitis E                                            |
| A705400   | Hepatitis non A non B                                        |
| A705z00   | Other specified viral hepatitis without mention of coma NOS  |
| A706.00   | Unspecified viral hepatitis with coma                        |
| A707.00   | Chronic viral hepatitis                                      |
| A707000   | Chronic viral hepatitis B with delta-agent                   |
| A707100   | Chronic viral hepatitis B without delta-agent                |
| A707200   | Chronic viral hepatitis C                                    |
| A707X00   | Chronic viral hepatitis, unspecified                         |
| A70z.00   | Unspecified viral hepatitis                                  |
| A70z000   | Hepatitis C                                                  |
| A72x000   | Mumps hepatitis                                              |
| A785200   | Cytomegaloviral hepatitis                                    |
| A916100   | Secondary syphilitic hepatitis                               |
| A98yy11   | Gonococcal hepatitis                                         |
| 9kZ..11   | Hepatitis B screening positive                               |
| 9kX..00   | Hepatitis status 6 months post treatment - enhanced serv adm |

| <b>Read Code</b> | <b>Description</b>                                        |
|------------------|-----------------------------------------------------------|
| 9kX..11          | Hepatitis status 6 months post treatment                  |
| 9kZ..00          | Hepatitis B screening positive - enhanced services admin  |
| 9kV..11          | Hepatitis C screening positive                            |
| 9kV..00          | Hepatitis C screening positive - enhanced services admin  |
| 9kR..00          | Chronic hepatitis annual review - enhanced services admin |
| 9kR..11          | Chronic hepatitis annual review                           |
| 7Q05300          | RSV treatment and Hepatitis C treatment drugs band 1      |
| 7Q05200          | Hepatitis B treatment drugs band 1                        |
| 65V3.11          | Hepatitis notification                                    |
| 141E.00          | History of hepatitis B                                    |
| 2J23.00          | Hepatitis A - current infection                           |
| 9kV..00          | Hepatitis C screening positive - enhanced services admin  |
| J635000          | Toxic liver disease with cholestasis                      |
| L18A000          | Cholestasis of pregnancy                                  |
| ZC2CH00          | Dietary advice for hepatic disorder                       |
| J61y600          | Hepatic fibrosis with hepatic sclerosis                   |
| J63A.00          | Hepatic granulomas in sarcoidosis                         |
| C310400          | Glycogenosis with hepatic cirrhosis                       |
| C32y511          | Hepatic familial steatosis                                |
| G820.11          | Hepatic vein thrombosis                                   |
| J639.00          | Hepatic granulomas in berylliosis                         |
| C32y500          | Steatosis                                                 |
| J615z15          | Hepatic fibrosis                                          |
| J61y400          | Hepatic fibrosis                                          |
| J620200          | Liver abscess via hepatic artery                          |
| J61y500          | Hepatic sclerosis                                         |
| M290400          | Chloasma hepaticum                                        |
| PB61500          | Congenital absence of hepatic ducts                       |
| PB61511          | Agenesis of hepatic ducts                                 |
| PB61600          | Atresia of hepatic ducts                                  |
| PB62.11          | Congenital hepatic cyst                                   |
| PB6yy00          | Other congenital anomaly of hepatic or bile ducts         |
| Q48yz11          | Congenital hepatic fibrosis                               |
| SB21100          | Hepatic vein injury                                       |
| SB22200          | Hepatic artery injury                                     |



**Supplementary Table 8.** Read codes used to identify pancreatic disorders.

| Read Code | Description                                                  |
|-----------|--------------------------------------------------------------|
| 44C4100   | Serum amylase (pancreatic) abnormal                          |
| A723.00   | Mumps pancreatitis                                           |
| A785100   | Cytomegaloviral pancreatitis                                 |
| B80z000   | Carcinoma in situ of pancreas                                |
| B905100   | Neoplasm of uncertain behaviour of pancreas                  |
| BB5B.00   | [M]Pancreatic adenomas and carcinomas                        |
| BB5Bz00   | [M]Pancreatic adenoma or carcinoma NOS                       |
| BBLK.00   | [M]Pancreatoblastoma                                         |
| C11..00   | Other disorders of pancreatic internal secretion             |
| Cyu3.00   | [X]Other disord of glucose regn & pancreatic intern secretn  |
| J6y..00   | Liver, biliary, pancreas + gastrointestinal diseases OS      |
| J6z..00   | Liver, biliary, pancreas + gastrointestinal diseases NOS     |
| Jyu8.00   | [X]Disorders of the gallbladder, biliary tract and pancreas  |
| Jyu8400   | [X]Other chronic pancreatitis                                |
| Jyu8500   | [X]Other specified diseases of pancreas                      |
| Jyu8700   | [X]Disorders of pancreas in diseases classified elsewhere    |
| PB70.00   | Congenital absence of pancreas                               |
| PB7..00   | Anomalies of pancreas                                        |
| PB71.00   | Agenesis of pancreas                                         |
| PB72.00   | Hypoplasia of pancreas                                       |
| PB73.00   | Accessory pancreas                                           |
| PB74.00   | Annular pancreas                                             |
| PB75.00   | Ectopic pancreas                                             |
| PB76.00   | Pancreatic heterotopia                                       |
| PB77.00   | Pancreatic cyst, congenital                                  |
| PB7y.00   | Other specified anomalies of pancreas                        |
| PB7z.00   | Anomalies of pancreas NOS                                    |
| Pyu5F00   | [X]Other congen malformation of pancreas & pancreatic duct   |
| R14A.00   | [D]Abnormal pancreatic function test                         |
| ZC2CK00   | Dietary advice for pancreatic disorder                       |
| 782..12   | Pancreas endoscopic operations                               |
| 7823z11   | Pancreatectomy NEC                                           |
| 7827000   | Sphincteroplasty bile duct & pancreatic duct duodenal appr   |
| 7827200   | Sphincteroplasty pancreatic duct using duodenal approach NEC |
| 7828000   | Sphincterotomy of bile duct & pancreatic duct duodenal appr  |
| 7828200   | Sphincterotomy of pancreatic duct duodenal approach NEC      |
| 782F000   | Endosc retrograde insertion tubal prosth to pancreatic duct  |
| 782F.00   | Therapeutic endoscopic retrograde pancreatic duct operations |
| 782F100   | Endoscopic retrograde renewal pancreatic duct tubal prosthes |
| 782F200   | Endoscopic retrograde removal calculus from pancreatic duct  |
| 782F300   | Endoscopic retrograde drainage of lesion of pancreas         |
| 782F400   | Endoscopic retrograde dilation of pancreatic duct            |

| <b>Read Code</b> | <b>Description</b>                                           |
|------------------|--------------------------------------------------------------|
| 782Fy00          | Therapeutic endoscopic retrograde op on pancreatic duct OS   |
| 782Fz00          | Therapeutic endoscopic retrograde op on pancreatic duct NOS  |
| 782J000          | Endoscopic retrograde pancreatography+biopsy lesion pancreas |
| 7830000          | Transplantation of pancreas and duodenum                     |
| 7830.00          | Transplantation of pancreas                                  |
| 783..00          | Pancreas operations                                          |
| 7830100          | Transplantation of whole pancreas                            |
| 7830200          | Transplantation of tail of pancreas                          |
| 7830400          | Renewal of transplanted pancreatic tissue                    |
| 7830y00          | Other specified transplantation of pancreas                  |
| 7830z00          | Transplantation of pancreas NOS                              |
| 7831000          | Total pancreatectomy and excision of surrounding tissue      |
| 7831.00          | Total excision of pancreas                                   |
| 7831100          | Total pancreatectomy NEC                                     |
| 7831.11          | Total pancreatectomy                                         |
| 7831200          | Excision of transplanted pancreas                            |
| 7831y00          | Other specified total excision of pancreas                   |
| 7831z00          | Total excision of pancreas NOS                               |
| 7832000          | Pancreaticoduodenectomy and excision of surrounding tissue   |
| 7832011          | Childs pancreaticoduodenectomy                               |
| 7832.00          | Excision of head of pancreas                                 |
| 7832100          | Pancreaticoduodenectomy and resection of antrum of stomach   |
| 7832111          | Rodney pancreaticoduodenectomy                               |
| 7832112          | Smith pancreaticoduodenectomy                                |
| 7832113          | Whipple pancreaticoduodenectomy                              |
| 7832.11          | Pancreatectomy, head of pancreas                             |
| 7832200          | Pancreaticoduodenectomy NEC                                  |
| 7832y00          | Other specified excision of head of pancreas                 |
| 7832z00          | Excision of head of pancreas NOS                             |
| 7833000          | Subtotal pancreatectomy                                      |
| 7833.00          | Other partial excision of pancreas                           |
| 7833011          | Childs distal subtotal pancreatectomy                        |
| 7833012          | Rodney-Smith dist subtotal pancreatectomy                    |
| 7833100          | Left pancreatectomy and drainage of pancreatic duct          |
| 7833.11          | Other partial excision of head of pancreas                   |
| 7833.12          | Partial pancreatectomy NEC                                   |
| 7833200          | Left pancreatectomy NEC                                      |
| 7833300          | Excision of tail of pancreas and drainage of pancreatic duct |
| 7833400          | Excision of tail of pancreas NEC                             |
| 7833500          | Pancreatectomy NEC                                           |
| 7833y00          | Other specified other partial excision of pancreas           |
| 7833z00          | Other partial excision of pancreas NOS                       |
| 7834000          | Excision of lesion of islet of Langerhans                    |
| 7834100          | Excision of lesion of pancreas NEC                           |

| <b>Read Code</b> | <b>Description</b>                                         |
|------------------|------------------------------------------------------------|
| 7834200          | Destruction of lesion of pancreas                          |
| 7834y00          | Other specified extirpation of lesion of pancreas          |
| 7834z00          | Extirpation of lesion of pancreas NOS                      |
| 7835000          | Anastomosis of pancreatic duct to stomach                  |
| 7835.00          | Connection of pancreatic duct                              |
| 7835100          | Anastomosis of pancreatic duct to duodenum                 |
| 7835.11          | Anastomosis of pancreatic duct                             |
| 7835.12          | Roux-en-y pancreaticojejunostomy                           |
| 7835200          | Anastomosis of pancreatic duct to transposed jejunum       |
| 7835211          | Pancreaticojejunostomy                                     |
| 7835212          | Peustow pancreaticojejunostomy                             |
| 7835300          | Anastomosis of pancreatic duct to jejunum NEC              |
| 7835400          | Revision of anastomosis of pancreatic duct                 |
| 7835500          | Closure of anastomosis of pancreatic duct                  |
| 7835y00          | Other specified connection of pancreatic duct              |
| 7835z00          | Connection of pancreatic duct NOS                          |
| 7836000          | Drainage of pancreatic duct                                |
| 7836.00          | Other open operations on pancreatic duct                   |
| 7836100          | Open removal of calculus from pancreatic duct              |
| 7836200          | Insertion of T tube into pancreatic duct                   |
| 7836300          | Open insertion of tubal prosthesis into pancreatic duct    |
| 7836400          | Open dilation of pancreatic duct                           |
| 7836500          | Repair of pancreatic duct                                  |
| 7836y00          | Other specified other open operation on pancreatic duct    |
| 7836z00          | Other open operation on pancreatic duct NOS                |
| 7837000          | Open cystogastrotomy of pancreas                           |
| 7837.00          | Open drainage of lesion of pancreas                        |
| 7837100          | Drainage of cyst of pancreas into transposed jejunum       |
| 7837.11          | Open drainage of cyst of pancreas                          |
| 7837200          | Drainage of cyst of pancreas into jejunum NEC              |
| 7837300          | Drainage of cyst of pancreas NEC                           |
| 7837y00          | Other specified open drainage of lesion of pancreas        |
| 7837z00          | Open drainage of lesion of pancreas NOS                    |
| 7838000          | Division of annular pancreas                               |
| 7838.00          | Incision of pancreas                                       |
| 7838y00          | Other specified incision of pancreas                       |
| 7838z00          | Incision of pancreas NOS                                   |
| 783A000          | Open biopsy of lesion of pancreas                          |
| 783A.00          | Other open operations on pancreas                          |
| 783A100          | Suture of pancreas                                         |
| 783Ay00          | Other specified other open operation on pancreas           |
| 783Az00          | Other open operation on pancreas NOS                       |
| 783B000          | Percut drain pancreas lesion+insert cystogastrost tube NEC |
| 783B.00          | Therapeutic percutaneous operations on pancreas            |

| <b>Read Code</b> | <b>Description</b>                                           |
|------------------|--------------------------------------------------------------|
| 783B100          | Percutaneous drain pancreas lesion+insert temp ext drain HFQ |
| 783B.11          | Therapeutic percutaneous drainage of pancreas operations     |
| 783B200          | Percutaneous drainage of lesion of pancreas NEC              |
| 783B300          | Percutaneous aspiration of lesion of pancreas                |
| 783By00          | Therapeutic percutaneous operation on pancreas OS            |
| 783Bz00          | Therapeutic percutaneous operation on pancreas NOS           |
| 783C100          | Percutaneous puncture of pancreatic duct and pancreatography |
| 783C200          | Needle biopsy of pancreas                                    |
| 783y.00          | Other specified operations on pancreas                       |
| 783z.00          | Pancreas operations NOS                                      |
| D201612          | Pancytopenia with pancreatitis                               |
| ZV42y12          | [V]Pancreas transplanted                                     |
| ZL1GO00          | Under care of pancreatic surgeon                             |
| ZL5GF00          | Referral to pancreatic surgeon                               |
| ZL9GN00          | Seen by pancreatic surgeon                                   |
| B173.00          | Malignant neoplasm of pancreatic duct                        |
| B17y000          | Malignant neoplasm of ectopic pancreatic tissue              |
| B716300          | Benign neoplasm of pancreatic duct                           |
| C10L000          | Fibrocalculous pancreatopathy without complication           |
| C10L.00          | Fibrocalculous pancreatopathy                                |
| C11y.00          | Other specified disorders of pancreatic internal secretio    |
| R104300          | [D]Amylase, serum level raised                               |
| R104400          | [D]Lipase, serum level raised                                |
| 14CH.00          | History of chronic pancreatitis                              |
| J671.00          | Chronic pancreatitis                                         |
| J671000          | Alcohol-induced chronic pancreatitis                         |
| J671100          | Gallstone chronic pancreatitis                               |

**Supplementary Table 9.** Read codes used to identify cancer.

| Read Code | Description                    |
|-----------|--------------------------------|
| 142..00   | H/O: malignant neoplasm (*)    |
| 142..11   | H/O: cancer                    |
| 142..13   | H/O: malignancy                |
| 1425000   | H/O Malignant melanoma         |
| 1429.00   | H/O: * leukaemia               |
| 142A.00   | H/O: * other lymph/haematopoi. |
| 14P7.00   | H/O: chemotherapy              |
| 1O0..00   | Cancer confirmed               |
| 4M2..00   | Lymphoma staging system        |
| 4M22.00   | Lymphoma stage III             |
| 4M23.00   | Lymphoma stage IV              |
| 5149.00   | Radiotherapy-tumour palliation |
| 59...00   | External radiotherapy          |
| 5971.00   | Extern.beam+intern.radiotherap |
| 5974.00   | Ext.beam-surgery+chemotherapy  |
| 5975.00   | Ext.beam + chemotherapy        |
| 5A...00   | Other nuclear therapy          |
| 5A...11   | Radiotherapy - internal        |
| 5A1..00   | Internal metabolic radiotherap |
| 5A11.00   | Thyroid gland ablat - irradiat |
| 5A12.00   | Thyroid tumour/metast irradiat |
| 5A13.00   | Bone marrow suppres.-irradiat. |
| 5A14.00   | Polycythaemia irradiation      |
| 5A15.00   | Bone tumour/metast.irradiat.   |
| 5A16.00   | Radioactive drug therapy       |
| 5A16.12   | Iodine 131 radiotherapy        |
| 5A17.00   | Combined internal radiotherapy |
| 5A1Z.00   | Internal metabolic radioth.NOS |
| 5A2..00   | Intern.radioth-unsealed source |
| 5A21.00   | Radioth.: infuse - skull/brain |
| 5A22.00   | Radioth.: infuse - head/neck   |
| 5A23.00   | Radioth.:infuse-pleural cavity |
| 5A24.00   | Radioth.:infuse-periton cavity |
| 5A25.00   | Radioth:endolymphatic infusion |
| 5A26.00   | Radioth:infuse-urinary bladder |
| 5A27.00   | Radioth.: infuse organ cavity  |
| 5A28.00   | Radioth.: infiltrate tissue    |
| 5A2Z.00   | Intern. unsealed radioth. NOS  |
| 5A3..00   | Intern.radioth-permanent seeds |
| 5A31.00   | Radioth:seeds into hypophysis  |
| 5A32.00   | Radioth.: seeds into brain     |
| 5A33.00   | Radioth.: seeds into cavity    |
| 5A3Z.00   | Radioth.: permanent seeds NOS  |

| <b>Read Code</b> | <b>Description</b>             |
|------------------|--------------------------------|
| 5A4.00           | Radioth.: temporary implant    |
| 5A4.11           | Radium needles                 |
| 5A41.00          | Radioth.: temp. brain implant  |
| 5A42.00          | Radioth:temp.head/neck implant |
| 5A43.00          | Radioth.: temp. tongue implant |
| 5A44.00          | Radioth.: temp. thorax implant |
| 5A45.00          | Radioth.: temp. abdom. implant |
| 5A46.00          | Radioth.: temp. pelvic implant |
| 5A47.00          | Radioth.: temp. limb implant   |
| 5A48.00          | Radioth:temp.lymphatic implant |
| 5A4Z.00          | Radioth.:temporary implant NOS |
| 5A5.00           | Preload cavity radioth.-sealed |
| 5A51.00          | Preload radioth.- orbit        |
| 5A52.00          | Preload radioth.-paranas sinus |
| 5A53.00          | Preload radioth.- nose         |
| 5A54.00          | Preload radioth.- mouth        |
| 5A55.00          | Preload radioth.- ear          |
| 5A56.00          | Preload radioth.- upper GIT    |
| 5A57.00          | Preload radioth.- resp.organs  |
| 5A58.00          | Preload radioth-female genital |
| 5A59.00          | Preload radioth-urinary system |
| 5A5A.00          | Preload radioth.- rectum       |
| 5A5B.00          | Preload radioth.- OP cavity    |
| 5A5Z.00          | Preload cavity radioth. NOS    |
| 5A6.00           | Afterloading cavity radiother. |
| 5A61.00          | Afterload radioth.- head       |
| 5A62.00          | Afterload radioth.- upper GIT  |
| 5A63.00          | Afterload radioth.-resp.system |
| 5A64.00          | Afterload radioth.-fem.genital |
| 5A65.00          | Afterload radioth.-urinary     |
| 5A66.00          | Afterload radioth.- rectum     |
| 5A67.00          | Afterload radioth.- OP cavity  |
| 5A6Z.00          | Afterload cavity radioth. NOS  |
| 5A7.00           | Radiomimetic chemotherapy      |
| 5A71.00          | Radio-chemo:local infiltration |
| 5A72.00          | Radio-chemo.: to stop spread   |
| 5A73.00          | Radio-chemo.: oral route       |
| 5A74.00          | Radio-chemo.: I-V route        |
| 5A75.00          | Radio-chem.:for immunosuppres. |
| 5A76.00          | Radio-chem.:local artery       |
| 5A77.00          | Radio-chem.: into cavity       |
| 5A7Z.00          | Radio-chemotherapy NOS         |
| 5A8Z.00          | Other radiotherapy NOS         |
| 5AZ.00           | Other nuclear therapy NOS      |
| 7046200          | Intrathecal chemotherapy       |

| Read Code | Description                                              |
|-----------|----------------------------------------------------------|
| 7130500   | Radical mastectomy including axillary lymph nodes        |
| 7130512   | Radical mastectomy                                       |
| 7D02300   | Vulvectomy and block dissection of inguinal lymph nodes  |
| 7D02311   | Bassett vulvectomy & block dissection inguin lymph nodes |
| 7H60.00   | Block dissection of lymph nodes                          |
| 7H60000   | Block dissection of cervical lymph nodes                 |
| 7H60100   | Block dissection of axillary lymph nodes                 |
| 7H60200   | Block dissection of mediastinal lymph nodes              |
| 7H60300   | Block dissection of paraaortic lymph nodes               |
| 7H60400   | Block dissection of inguinal lymph nodes                 |
| 7H60500   | Functional block dissection of cervical lymph nodes      |
| 7H60600   | Supra hyoid block dissection of cervical lymph nodes     |
| 7H60800   | Radical neck dissection of cervical lymph nodes          |
| 7H60y00   | Other specified block dissection of lymph nodes          |
| 7H60z00   | Block dissection of lymph nodes NOS                      |
| 7H62.00   | Excision or biopsy of lymph node                         |
| 7H62000   | Excision or biopsy of scalene lymph node                 |
| 7H62100   | Excision or biopsy of cervical lymph node NEC            |
| 7H62200   | Excision or biopsy of axillary lymph node                |
| 7H62300   | Excision or biopsy of mediastinal lymph node             |
| 7H62400   | Excision or biopsy of paraaortic lymph node              |
| 7H62500   | Excision or biopsy of porta hepatitis lymph node         |
| 7H62600   | Excision or biopsy of inguinal lymph node                |
| 7H62700   | Excision or biopsy of pelvic lymph node                  |
| 7H62800   | Excision or biopsy of obturator lymph node               |
| 7H62900   | Supraclavicular lymph node biopsy                        |
| 7H62911   | Sentinel lymph node biopsy                               |
| 7H62912   | Signal lymph node biopsy                                 |
| 7H62y00   | Other specified excision or biopsy of lymph node         |
| 7H62z00   | Excision or biopsy of lymph node NOS                     |
| 7L10200   | Continuous infusion of chemotherapy                      |
| 7L16100   | Intravenous chemotherapy                                 |
| 7L18200   | Intramuscular chemotherapy                               |
| 7L19300   | Subcutaneous chemotherapy                                |
| 7M37100   | Radiotherapy NEC                                         |
| 8BA5.00   | Oral chemotherapy                                        |
| 8BAD.00   | Chemotherapy                                             |
| 8BAD000   | Cancer chemotherapy                                      |
| 8BAV.00   | Cancer care review                                       |
| 8HB7.00   | Chemotherapy follow-up                                   |
| 8HHt.00   | Fast track cancer referral                               |
| 8HKD.00   | Oncology D.V. requested                                  |
| 8HLD.00   | Oncology D.V. done                                       |
| 8HMD.00   | Listed for Oncology admission                            |

| Read Code | Description                                                |
|-----------|------------------------------------------------------------|
| 8Hn0.00   | Fast track referral for suspected skin cancer              |
| 8Hn1.00   | Fast track referral for suspected gynaecological cancer    |
| 8Hn2.00   | Fast track referral for suspected breast cancer            |
| 8Hn4.00   | Fast track referral for suspected colorectal cancer        |
| 8Hn5.00   | Fast track referral for suspected urological cancer        |
| 8Hn7.00   | Fast track referral for suspected lung cancer              |
| 8Hn9.00   | Fast track referral for suspected upper GI cancer          |
| 8HnB.00   | Fast track referral for suspected head and neck cancer     |
| 9N09.00   | Seen in oncology clinic                                    |
| 9N0D.00   | Seen in radiotherapy clinic                                |
| 9N1y800   | Seen in oncology clinic                                    |
| 9Np..00   | Seen in fast track suspected cancer clinic                 |
| 9Np2.00   | Seen in fast track suspected breast cancer clinic          |
| 9Np6.00   | Seen in fast track suspected head and neck cancer clinic   |
| 9Np7.00   | Seen in fast track suspected colorectal cancer clinic      |
| 9Np8.00   | Seen in fast track suspected lung cancer clinic            |
| 9OkC.00   | Patient on regional cancer register                        |
| 9b9I.00   | Medical oncology                                           |
| 9bB0.00   | Clinical oncology                                          |
| A788W00   | HIV disease resulting in unspecified malignant neoplasm    |
| A789500   | HIV disease resulting in Kaposi's sarcoma                  |
| A789600   | HIV disease resulting in Burkitt's lymphoma                |
| A789700   | HIV dis resulting oth types of non-Hodgkin's lymphoma      |
| AyuC600   | [X]HIV disease resulting in other non-Hodgkin's lymphoma   |
| AyuC900   | [X]HIV disease resulting in unspecified malignant neoplasm |
| B....00   | Neoplasms                                                  |
| B....11   | Cancers                                                    |
| B0...00   | Malignant neoplasm of lip, oral cavity and pharynx         |
| B0...11   | Carcinoma of lip, oral cavity and pharynx                  |
| B00..00   | Malignant neoplasm of lip                                  |
| B00..11   | Carcinoma of lip                                           |
| B000.00   | Malignant neoplasm of upper lip, vermilion border          |
| B000000   | Malignant neoplasm of upper lip, external                  |
| B000100   | Malignant neoplasm of upper lip, lipstick area             |
| B000z00   | Malignant neoplasm of upper lip, vermilion border NOS      |
| B001.00   | Malignant neoplasm of lower lip, vermilion border          |
| B001000   | Malignant neoplasm of lower lip, external                  |
| B001100   | Malignant neoplasm of lower lip, lipstick area             |
| B001z00   | Malignant neoplasm of lower lip, vermilion border NOS      |
| B002.00   | Malignant neoplasm of upper lip, inner aspect              |
| B002000   | Malignant neoplasm of upper lip, buccal aspect             |
| B002100   | Malignant neoplasm of upper lip, frenulum                  |
| B002200   | Malignant neoplasm of upper lip, mucosa                    |
| B002300   | Malignant neoplasm of upper lip, oral aspect               |
| B002z00   | Malignant neoplasm of upper lip, inner aspect NOS          |



| <b>Read Code</b> | <b>Description</b>                                           |
|------------------|--------------------------------------------------------------|
| B003.00          | Malignant neoplasm of lower lip, inner aspect                |
| B003000          | Malignant neoplasm of lower lip, buccal aspect               |
| B003100          | Malignant neoplasm of lower lip, frenulum                    |
| B003200          | Malignant neoplasm of lower lip, mucosa                      |
| B003300          | Malignant neoplasm of lower lip, oral aspect                 |
| B003z00          | Malignant neoplasm of lower lip, inner aspect NOS            |
| B004.00          | Malignant neoplasm of lip unspecified, inner aspect          |
| B004000          | Malignant neoplasm of lip unspecified, buccal aspect         |
| B004100          | Malignant neoplasm of lip unspecified, frenulum              |
| B004200          | Malignant neoplasm of lip unspecified, mucosa                |
| B004300          | Malignant neoplasm of lip, oral aspect                       |
| B004z00          | Malignant neoplasm of lip, inner aspect NOS                  |
| B005.00          | Malignant neoplasm of commissure of lip                      |
| B006.00          | Malignant neoplasm of overlapping lesion of lip              |
| B007.00          | Malignant neoplasm of lip, unspecified                       |
| B00y.00          | Malignant neoplasm of other sites of lip                     |
| B00z.00          | Malignant neoplasm of vermilion border of lip unspecified    |
| B00z000          | Malignant neoplasm of lip, unspecified, external             |
| B00z100          | Malignant neoplasm of lip, unspecified, lipstick area        |
| B00zz00          | Malignant neoplasm of lip, vermilion border NOS              |
| B01..00          | Malignant neoplasm of tongue                                 |
| B010.00          | Malignant neoplasm of base of tongue                         |
| B010.11          | Malignant neoplasm of posterior third of tongue              |
| B010000          | Malignant neoplasm of base of tongue dorsal surface          |
| B010z00          | Malignant neoplasm of fixed part of tongue NOS               |
| B011.00          | Malignant neoplasm of dorsal surface of tongue               |
| B011000          | Malignant neoplasm of anterior 2/3 of tongue dorsal surface  |
| B011100          | Malignant neoplasm of midline of tongue                      |
| B011z00          | Malignant neoplasm of dorsum of tongue NOS                   |
| B012.00          | Malignant neoplasm of tongue, tip and lateral border         |
| B013.00          | Malignant neoplasm of ventral surface of tongue              |
| B013000          | Malignant neoplasm of anterior 2/3 of tongue ventral surface |
| B013100          | Malignant neoplasm of frenulum linguae                       |
| B013z00          | Malignant neoplasm of ventral tongue surface NOS             |
| B014.00          | Malignant neoplasm of anterior 2/3 of tongue unspecified     |
| B015.00          | Malignant neoplasm of tongue, junctional zone                |
| B016.00          | Malignant neoplasm of lingual tonsil                         |
| B017.00          | Malignant overlapping lesion of tongue                       |
| B01y.00          | Malignant neoplasm of other sites of tongue                  |
| B01z.00          | Malignant neoplasm of tongue NOS                             |
| B02..00          | Malignant neoplasm of major salivary glands                  |
| B020.00          | Malignant neoplasm of parotid gland                          |
| B021.00          | Malignant neoplasm of submandibular gland                    |
| B022.00          | Malignant neoplasm of sublingual gland                       |

| <b>Read Code</b> | <b>Description</b>                                          |
|------------------|-------------------------------------------------------------|
| B023.00          | Malignant neoplasm, overlapping lesion of major saliv gland |
| B02y.00          | Malignant neoplasm of other major salivary glands           |
| B02z.00          | Malignant neoplasm of major salivary gland NOS              |
| B03..00          | Malignant neoplasm of gum                                   |
| B030.00          | Malignant neoplasm of upper gum                             |
| B031.00          | Malignant neoplasm of lower gum                             |
| B03y.00          | Malignant neoplasm of other sites of gum                    |
| B03z.00          | Malignant neoplasm of gum NOS                               |
| B04..00          | Malignant neoplasm of floor of mouth                        |
| B040.00          | Malignant neoplasm of anterior portion of floor of mouth    |
| B041.00          | Malignant neoplasm of lateral portion of floor of mouth     |
| B042.00          | Malignant neoplasm, overlapping lesion of floor of mouth    |
| B04y.00          | Malignant neoplasm of other sites of floor of mouth         |
| B04z.00          | Malignant neoplasm of floor of mouth NOS                    |
| B05..00          | Malignant neoplasm of other and unspecified parts of mouth  |
| B050.00          | Malignant neoplasm of cheek mucosa                          |
| B050.11          | Malignant neoplasm of buccal mucosa                         |
| B051.00          | Malignant neoplasm of vestibule of mouth                    |
| B051000          | Malignant neoplasm of upper buccal sulcus                   |
| B051100          | Malignant neoplasm of lower buccal sulcus                   |
| B051200          | Malignant neoplasm of upper labial sulcus                   |
| B051300          | Malignant neoplasm of lower labial sulcus                   |
| B051z00          | Malignant neoplasm of vestibule of mouth NOS                |
| B052.00          | Malignant neoplasm of hard palate                           |
| B053.00          | Malignant neoplasm of soft palate                           |
| B054.00          | Malignant neoplasm of uvula                                 |
| B055.00          | Malignant neoplasm of palate unspecified                    |
| B055000          | Malignant neoplasm of junction of hard and soft palate      |
| B055100          | Malignant neoplasm of roof of mouth                         |
| B055z00          | Malignant neoplasm of palate NOS                            |
| B056.00          | Malignant neoplasm of retromolar area                       |
| B057.00          | Overlapping lesion of other and unspecified parts of mouth  |
| B05y.00          | Malignant neoplasm of other specified mouth parts           |
| B05z.00          | Malignant neoplasm of mouth NOS                             |
| B05z000          | Kaposi's sarcoma of palate                                  |
| B06..00          | Malignant neoplasm of oropharynx                            |
| B060.00          | Malignant neoplasm of tonsil                                |
| B060000          | Malignant neoplasm of faucial tonsil                        |
| B060100          | Malignant neoplasm of palatine tonsil                       |
| B060200          | Malignant neoplasm of overlapping lesion of tonsil          |
| B060z00          | Malignant neoplasm tonsil NOS                               |
| B061.00          | Malignant neoplasm of tonsillar fossa                       |
| B062.00          | Malignant neoplasm of tonsillar pillar                      |
| B062000          | Malignant neoplasm of faucial pillar                        |

| Read Code | Description                                                  |
|-----------|--------------------------------------------------------------|
| B062100   | Malignant neoplasm of glossopalatine fold                    |
| B062200   | Malignant neoplasm of palatoglossal arch                     |
| B062300   | Malignant neoplasm of palatopharyngeal arch                  |
| B062z00   | Malignant neoplasm of tonsillar fossa NOS                    |
| B063.00   | Malignant neoplasm of vallecula                              |
| B064.00   | Malignant neoplasm of anterior epiglottis                    |
| B064000   | Malignant neoplasm of epiglottis, free border                |
| B064100   | Malignant neoplasm of glossoepiglottic fold                  |
| B064z00   | Malignant neoplasm of anterior epiglottis NOS                |
| B065.00   | Malignant neoplasm of junctional region of epiglottis        |
| B066.00   | Malignant neoplasm of lateral wall of oropharynx             |
| B067.00   | Malignant neoplasm of posterior wall of oropharynx           |
| B06y.00   | Malignant neoplasm of oropharynx, other specified sites      |
| B06y000   | Malignant neoplasm of branchial cleft                        |
| B06yz00   | Malignant neoplasm of other specified site of oropharynx NOS |
| B06z.00   | Malignant neoplasm of oropharynx NOS                         |
| B07..00   | Malignant neoplasm of nasopharynx                            |
| B070.00   | Malignant neoplasm of roof of nasopharynx                    |
| B071.00   | Malignant neoplasm of posterior wall of nasopharynx          |
| B071000   | Malignant neoplasm of adenoid                                |
| B071100   | Malignant neoplasm of pharyngeal tonsil                      |
| B071z00   | Malignant neoplasm of posterior wall of nasopharynx NOS      |
| B072.00   | Malignant neoplasm of lateral wall of nasopharynx            |
| B072000   | Malignant neoplasm of pharyngeal recess                      |
| B072100   | Malignant neoplasm of opening of auditory tube               |
| B072z00   | Malignant neoplasm of lateral wall of nasopharynx NOS        |
| B073.00   | Malignant neoplasm of anterior wall of nasopharynx           |
| B073000   | Malignant neoplasm of floor of nasopharynx                   |
| B073100   | Malignant neoplasm of nasopharyngeal soft palate surface     |
| B073200   | Malignant neoplasm posterior margin nasal septum and choanae |
| B073z00   | Malignant neoplasm of anterior wall of nasopharynx NOS       |
| B074.00   | Malignant neoplasm, overlapping lesion of nasopharynx        |
| B07y.00   | Malignant neoplasm of other specified site of nasopharynx    |
| B07z.00   | Malignant neoplasm of nasopharynx NOS                        |
| B08..00   | Malignant neoplasm of hypopharynx                            |
| B080.00   | Malignant neoplasm of postericoid region                     |
| B081.00   | Malignant neoplasm of pyriform sinus                         |
| B082.00   | Malignant neoplasm aryepiglottic fold, hypopharyngeal aspect |
| B083.00   | Malignant neoplasm of posterior pharynx                      |
| B084.00   | Malignant neoplasm, overlapping lesion of hypopharynx        |
| B08y.00   | Malignant neoplasm of other specified hypopharyngeal site    |
| B08z.00   | Malignant neoplasm of hypopharynx NOS                        |
| B0z..00   | Malig neop other/ill-defined sites lip, oral cavity, pharynx |

| <b>Read Code</b> | <b>Description</b>                                           |
|------------------|--------------------------------------------------------------|
| B0z0.00          | Malignant neoplasm of pharynx unspecified                    |
| B0z1.00          | Malignant neoplasm of Waldeyer's ring                        |
| B0z2.00          | Malignant neoplasm of laryngopharynx                         |
| B0zy.00          | Malignant neoplasm of other sites lip, oral cavity, pharynx  |
| B0zz.00          | Malignant neoplasm of lip, oral cavity and pharynx NOS       |
| B1...00          | Malignant neoplasm of digestive organs and peritoneum        |
| B1...11          | Carcinoma of digestive organs and peritoneum                 |
| B10..00          | Malignant neoplasm of oesophagus                             |
| B100.00          | Malignant neoplasm of cervical oesophagus                    |
| B101.00          | Malignant neoplasm of thoracic oesophagus                    |
| B102.00          | Malignant neoplasm of abdominal oesophagus                   |
| B103.00          | Malignant neoplasm of upper third of oesophagus              |
| B104.00          | Malignant neoplasm of middle third of oesophagus             |
| B105.00          | Malignant neoplasm of lower third of oesophagus              |
| B106.00          | Malignant neoplasm, overlapping lesion of oesophagus         |
| B107.00          | Siewert type I adenocarcinoma                                |
| B10y.00          | Malignant neoplasm of other specified part of oesophagus     |
| B10z.00          | Malignant neoplasm of oesophagus NOS                         |
| B10z.11          | Oesophageal cancer                                           |
| B11..00          | Malignant neoplasm of stomach                                |
| B11..11          | Gastric neoplasm                                             |
| B110.00          | Malignant neoplasm of cardia of stomach                      |
| B110000          | Malignant neoplasm of cardiac orifice of stomach             |
| B110100          | Malignant neoplasm of cardio-oesophageal junction of stomach |
| B110111          | Malignant neoplasm of gastro-oesophageal junction            |
| B110z00          | Malignant neoplasm of cardia of stomach NOS                  |
| B111.00          | Malignant neoplasm of pylorus of stomach                     |
| B111000          | Malignant neoplasm of prepylorus of stomach                  |
| B111100          | Malignant neoplasm of pyloric canal of stomach               |
| B111z00          | Malignant neoplasm of pylorus of stomach NOS                 |
| B112.00          | Malignant neoplasm of pyloric antrum of stomach              |
| B113.00          | Malignant neoplasm of fundus of stomach                      |
| B114.00          | Malignant neoplasm of body of stomach                        |
| B115.00          | Malignant neoplasm of lesser curve of stomach unspecified    |
| B116.00          | Malignant neoplasm of greater curve of stomach unspecified   |
| B117.00          | Malignant neoplasm, overlapping lesion of stomach            |
| B118.00          | Siewert type II adenocarcinoma                               |
| B119.00          | Siewert type III adenocarcinoma                              |
| B11y.00          | Malignant neoplasm of other specified site of stomach        |
| B11y000          | Malignant neoplasm of anterior wall of stomach NEC           |
| B11y100          | Malignant neoplasm of posterior wall of stomach NEC          |
| B11yz00          | Malignant neoplasm of other specified site of stomach NOS    |
| B11z.00          | Malignant neoplasm of stomach NOS                            |
| B12..00          | Malignant neoplasm of small intestine and duodenum           |

| <b>Read Code</b> | <b>Description</b>                                           |
|------------------|--------------------------------------------------------------|
| B120.00          | Malignant neoplasm of duodenum                               |
| B121.00          | Malignant neoplasm of jejunum                                |
| B122.00          | Malignant neoplasm of ileum                                  |
| B123.00          | Malignant neoplasm of Meckel's diverticulum                  |
| B124.00          | Malignant neoplasm, overlapping lesion of small intestine    |
| B12y.00          | Malignant neoplasm of other specified site small intestine   |
| B12z.00          | Malignant neoplasm of small intestine NOS                    |
| B13..00          | Malignant neoplasm of colon                                  |
| B130.00          | Malignant neoplasm of hepatic flexure of colon               |
| B131.00          | Malignant neoplasm of transverse colon                       |
| B132.00          | Malignant neoplasm of descending colon                       |
| B133.00          | Malignant neoplasm of sigmoid colon                          |
| B134.00          | Malignant neoplasm of caecum                                 |
| B134.11          | Carcinoma of caecum                                          |
| B135.00          | Malignant neoplasm of appendix                               |
| B136.00          | Malignant neoplasm of ascending colon                        |
| B137.00          | Malignant neoplasm of splenic flexure of colon               |
| B138.00          | Malignant neoplasm, overlapping lesion of colon              |
| B139.00          | Hereditary nonpolyposis colon cancer                         |
| B13y.00          | Malignant neoplasm of other specified sites of colon         |
| B13z.00          | Malignant neoplasm of colon NOS                              |
| B13z.11          | Colonic cancer                                               |
| B14..00          | Malignant neoplasm of rectum, rectosigmoid junction and anus |
| B140.00          | Malignant neoplasm of rectosigmoid junction                  |
| B141.00          | Malignant neoplasm of rectum                                 |
| B141.11          | Carcinoma of rectum                                          |
| B141.12          | Rectal carcinoma                                             |
| B142.00          | Malignant neoplasm of anal canal                             |
| B142.11          | Anal carcinoma                                               |
| B142000          | Malignant neoplasm of cloacogenic zone                       |
| B143.00          | Malignant neoplasm of anus unspecified                       |
| B14y.00          | Malig neop other site rectum, rectosigmoid junction and anus |
| B14z.00          | Malignant neoplasm rectum,rectosigmoid junction and anus NOS |
| B15..00          | Malignant neoplasm of liver and intrahepatic bile ducts      |
| B150.00          | Primary malignant neoplasm of liver                          |
| B150000          | Primary carcinoma of liver                                   |
| B150100          | Hepatoblastoma of liver                                      |
| B150200          | Primary angiosarcoma of liver                                |
| B150300          | Hepatocellular carcinoma                                     |
| B150z00          | Primary malignant neoplasm of liver NOS                      |
| B151.00          | Malignant neoplasm of intrahepatic bile ducts                |
| B151000          | Malignant neoplasm of interlobular bile ducts                |
| B151100          | Malignant neoplasm of interlobular biliary canals            |

| <b>Read Code</b> | <b>Description</b>                                          |
|------------------|-------------------------------------------------------------|
| B151200          | Malignant neoplasm of intrahepatic biliary passages         |
| B151300          | Malignant neoplasm of intrahepatic canaliculi               |
| B151400          | Malignant neoplasm of intrahepatic gall duct                |
| B151z00          | Malignant neoplasm of intrahepatic bile ducts NOS           |
| B152.00          | Malignant neoplasm of liver unspecified                     |
| B153.00          | Secondary malignant neoplasm of liver                       |
| B15z.00          | Malignant neoplasm of liver and intrahepatic bile ducts NOS |
| B16..00          | Malignant neoplasm gallbladder and extrahepatic bile ducts  |
| B160.00          | Malignant neoplasm of gallbladder                           |
| B160.11          | Carcinoma gallbladder                                       |
| B161.00          | Malignant neoplasm of extrahepatic bile ducts               |
| B161000          | Malignant neoplasm of cystic duct                           |
| B161100          | Malignant neoplasm of hepatic duct                          |
| B161200          | Malignant neoplasm of common bile duct                      |
| B161211          | Carcinoma common bile duct                                  |
| B161300          | Malignant neoplasm of sphincter of Oddi                     |
| B161z00          | Malignant neoplasm of extrahepatic bile ducts NOS           |
| B162.00          | Malignant neoplasm of ampulla of Vater                      |
| B163.00          | Malignant neoplasm, overlapping lesion of biliary tract     |
| B16y.00          | Malignant neoplasm other gallbladder/extrahepatic bile duct |
| B16z.00          | Malignant neoplasm gallbladder/extrahepatic bile ducts NOS  |
| B17..00          | Malignant neoplasm of pancreas                              |
| B170.00          | Malignant neoplasm of head of pancreas                      |
| B171.00          | Malignant neoplasm of body of pancreas                      |
| B172.00          | Malignant neoplasm of tail of pancreas                      |
| B173.00          | Malignant neoplasm of pancreatic duct                       |
| B174.00          | Malignant neoplasm of Islets of Langerhans                  |
| B175.00          | Malignant neoplasm, overlapping lesion of pancreas          |
| B176.00          | Somatostatinoma of pancreas                                 |
| B17y.00          | Malignant neoplasm of other specified sites of pancreas     |
| B17y000          | Malignant neoplasm of ectopic pancreatic tissue             |
| B17yz00          | Malignant neoplasm of specified site of pancreas NOS        |
| B17z.00          | Malignant neoplasm of pancreas NOS                          |
| B18..00          | Malignant neoplasm of retroperitoneum and peritoneum        |
| B180.00          | Malignant neoplasm of retroperitoneum                       |
| B180000          | Malignant neoplasm of periadrenal tissue                    |
| B180100          | Malignant neoplasm of perinephric tissue                    |
| B180200          | Malignant neoplasm of retrocaecal tissue                    |
| B180z00          | Malignant neoplasm of retroperitoneum NOS                   |
| B181.00          | Mesothelioma of peritoneum                                  |
| B182.00          | Overlapping malign lesion of retroperitoneum and peritoneum |
| B18y.00          | Malignant neoplasm of specified parts of peritoneum         |
| B18y000          | Malignant neoplasm of mesocolon                             |

| <b>Read Code</b> | <b>Description</b>                                           |
|------------------|--------------------------------------------------------------|
| B18y100          | Malignant neoplasm of mesocaecum                             |
| B18y200          | Malignant neoplasm of mesorectum                             |
| B18y300          | Malignant neoplasm of omentum                                |
| B18y400          | Malignant neoplasm of parietal peritoneum                    |
| B18y500          | Malignant neoplasm of pelvic peritoneum                      |
| B18y600          | Malignant neoplasm of the pouch of Douglas                   |
| B18y700          | Malignant neoplasm of mesentery                              |
| B18yz00          | Malignant neoplasm of specified parts of peritoneum NOS      |
| B18z.00          | Malignant neoplasm of retroperitoneum and peritoneum NOS     |
| B1z..00          | Malig neop oth/ill-defined sites digestive tract/peritoneum  |
| B1z0.00          | Malignant neoplasm of intestinal tract, part unspecified     |
| B1z0.11          | Cancer of bowel                                              |
| B1z1.00          | Malignant neoplasm of spleen NEC                             |
| B1z1000          | Angiosarcoma of spleen                                       |
| B1z1100          | Fibrosarcoma of spleen                                       |
| B1z1z00          | Malignant neoplasm of spleen NOS                             |
| B1z2.00          | Malignant neoplasm, overlapping lesion of digestive system   |
| B1zy.00          | Malignant neoplasm other spec digestive tract and peritoneum |
| B1zz.00          | Malignant neoplasm of digestive tract and peritoneum NOS     |
| B2...00          | Malig neop of respiratory tract and intrathoracic organs     |
| B2...11          | Carcinoma of respiratory tract and intrathoracic organs      |
| B20..00          | Malig neop nasal cavities, middle ear and accessory sinuses  |
| B200.00          | Malignant neoplasm of nasal cavities                         |
| B200000          | Malignant neoplasm of cartilage of nose                      |
| B200100          | Malignant neoplasm of nasal conchae                          |
| B200200          | Malignant neoplasm of septum of nose                         |
| B200300          | Malignant neoplasm of vestibule of nose                      |
| B200z00          | Malignant neoplasm of nasal cavities NOS                     |
| B201.00          | Malig neop auditory tube, middle ear and mastoid air cells   |
| B201000          | Malignant neoplasm of auditory (Eustachian) tube             |
| B201100          | Malignant neoplasm of tympanic cavity                        |
| B201200          | Malignant neoplasm of tympanic antrum                        |
| B201300          | Malignant neoplasm of mastoid air cells                      |
| B201z00          | Malig neop auditory tube, middle ear, mastoid air cells NOS  |
| B202.00          | Malignant neoplasm of maxillary sinus                        |
| B203.00          | Malignant neoplasm of ethmoid sinus                          |
| B204.00          | Malignant neoplasm of frontal sinus                          |
| B205.00          | Malignant neoplasm of sphenoidal sinus                       |
| B206.00          | Malignant neoplasm, overlapping lesion of accessory sinuses  |
| B20y.00          | Malig neop other site nasal cavity, middle ear and sinuses   |
| B20z.00          | Malignant neoplasm of accessory sinus NOS                    |
| B21..00          | Malignant neoplasm of larynx                                 |
| B210.00          | Malignant neoplasm of glottis                                |

| <b>Read Code</b> | <b>Description</b>                                          |
|------------------|-------------------------------------------------------------|
| B211.00          | Malignant neoplasm of supraglottis                          |
| B212.00          | Malignant neoplasm of subglottis                            |
| B213.00          | Malignant neoplasm of laryngeal cartilage                   |
| B213000          | Malignant neoplasm of arytenoid cartilage                   |
| B213100          | Malignant neoplasm of cricoid cartilage                     |
| B213200          | Malignant neoplasm of cuneiform cartilage                   |
| B213300          | Malignant neoplasm of thyroid cartilage                     |
| B213z00          | Malignant neoplasm of laryngeal cartilage NOS               |
| B214.00          | Malignant neoplasm, overlapping lesion of larynx            |
| B215.00          | Malignant neoplasm of epiglottis NOS                        |
| B21y.00          | Malignant neoplasm of larynx, other specified site          |
| B21z.00          | Malignant neoplasm of larynx NOS                            |
| B22..00          | Malignant neoplasm of trachea, bronchus and lung            |
| B220.00          | Malignant neoplasm of trachea                               |
| B220000          | Malignant neoplasm of cartilage of trachea                  |
| B220100          | Malignant neoplasm of mucosa of trachea                     |
| B220z00          | Malignant neoplasm of trachea NOS                           |
| B221.00          | Malignant neoplasm of main bronchus                         |
| B221000          | Malignant neoplasm of carina of bronchus                    |
| B221100          | Malignant neoplasm of hilus of lung                         |
| B221z00          | Malignant neoplasm of main bronchus NOS                     |
| B222.00          | Malignant neoplasm of upper lobe, bronchus or lung          |
| B222.11          | Pancoast's syndrome                                         |
| B222000          | Malignant neoplasm of upper lobe bronchus                   |
| B222100          | Malignant neoplasm of upper lobe of lung                    |
| B222z00          | Malignant neoplasm of upper lobe, bronchus or lung NOS      |
| B223.00          | Malignant neoplasm of middle lobe, bronchus or lung         |
| B223000          | Malignant neoplasm of middle lobe bronchus                  |
| B223100          | Malignant neoplasm of middle lobe of lung                   |
| B223z00          | Malignant neoplasm of middle lobe, bronchus or lung NOS     |
| B224.00          | Malignant neoplasm of lower lobe, bronchus or lung          |
| B224000          | Malignant neoplasm of lower lobe bronchus                   |
| B224100          | Malignant neoplasm of lower lobe of lung                    |
| B224z00          | Malignant neoplasm of lower lobe, bronchus or lung NOS      |
| B225.00          | Malignant neoplasm of overlapping lesion of bronchus & lung |
| B226.00          | Mesothelioma                                                |
| B22y.00          | Malignant neoplasm of other sites of bronchus or lung       |
| B22z.00          | Malignant neoplasm of bronchus or lung NOS                  |
| B22z.11          | Lung cancer                                                 |
| B23..00          | Malignant neoplasm of pleura                                |
| B230.00          | Malignant neoplasm of parietal pleura                       |
| B231.00          | Malignant neoplasm of visceral pleura                       |
| B232.00          | Mesothelioma of pleura                                      |
| B23y.00          | Malignant neoplasm of other specified pleura                |



| Read Code | Description                                                  |
|-----------|--------------------------------------------------------------|
| B23z.00   | Malignant neoplasm of pleura NOS                             |
| B24..00   | Malignant neoplasm of thymus, heart and mediastinum          |
| B240.00   | Malignant neoplasm of thymus                                 |
| B241.00   | Malignant neoplasm of heart                                  |
| B241000   | Malignant neoplasm of endocardium                            |
| B241100   | Malignant neoplasm of epicardium                             |
| B241200   | Malignant neoplasm of myocardium                             |
| B241300   | Malignant neoplasm of pericardium                            |
| B241400   | Mesothelioma of pericardium                                  |
| B241z00   | Malignant neoplasm of heart NOS                              |
| B242.00   | Malignant neoplasm of anterior mediastinum                   |
| B243.00   | Malignant neoplasm of posterior mediastinum                  |
| B24X.00   | Malignant neoplasm of mediastinum, part unspecified          |
| B24y.00   | Malig neop of other site of heart, thymus and mediastinum    |
| B24z.00   | Malignant neoplasm of heart, thymus and mediastinum NOS      |
| B25..00   | Malig neo, overlapping lesion of heart, mediastinum & pleura |
| B26..00   | Malignant neoplasm, overlap lesion of resp & intrathor orgs  |
| B2z..00   | Malig neop other/ill-defined sites resp/intrathoracic organs |
| B2z0.00   | Malig neop of upper respiratory tract, part unspecified      |
| B2zy.00   | Malignant neoplasm of other site of respiratory tract        |
| B2zz.00   | Malignant neoplasm of respiratory tract NOS                  |
| B3...00   | Malig neop of bone, connective tissue, skin and breast       |
| B3...11   | Carcinoma of bone, connective tissue, skin and breast        |
| B3...12   | Sarcoma of bone and connective tissue                        |
| B30..00   | Malignant neoplasm of bone and articular cartilage           |
| B30..11   | Chondroma                                                    |
| B30..12   | Osteoma                                                      |
| B300.00   | Malignant neoplasm of bones of skull and face                |
| B300000   | Malignant neoplasm of ethmoid bone                           |
| B300100   | Malignant neoplasm of frontal bone                           |
| B300200   | Malignant neoplasm of malar bone                             |
| B300300   | Malignant neoplasm of nasal bone                             |
| B300400   | Malignant neoplasm of occipital bone                         |
| B300500   | Malignant neoplasm of orbital bone                           |
| B300600   | Malignant neoplasm of parietal bone                          |
| B300700   | Malignant neoplasm of sphenoid bone                          |
| B300800   | Malignant neoplasm of temporal bone                          |
| B300900   | Malignant neoplasm of zygomatic bone                         |
| B300A00   | Malignant neoplasm of maxilla                                |
| B300B00   | Malignant neoplasm of turbinate                              |
| B300C00   | Malignant neoplasm of vomer                                  |
| B300z00   | Malignant neoplasm of bones of skull and face NOS            |
| B301.00   | Malignant neoplasm of mandible                               |
| B302.00   | Malignant neoplasm of vertebral column                       |

| <b>Read Code</b> | <b>Description</b>                                        |
|------------------|-----------------------------------------------------------|
| B302000          | Malignant neoplasm of cervical vertebra                   |
| B302100          | Malignant neoplasm of thoracic vertebra                   |
| B302200          | Malignant neoplasm of lumbar vertebra                     |
| B302z00          | Malignant neoplasm of vertebral column NOS                |
| B303.00          | Malignant neoplasm of ribs, sternum and clavicle          |
| B303000          | Malignant neoplasm of rib                                 |
| B303100          | Malignant neoplasm of sternum                             |
| B303200          | Malignant neoplasm of clavicle                            |
| B303300          | Malignant neoplasm of costal cartilage                    |
| B303400          | Malignant neoplasm of costo-vertebral joint               |
| B303500          | Malignant neoplasm of xiphoid process                     |
| B303z00          | Malignant neoplasm of rib, sternum and clavicle NOS       |
| B304.00          | Malignant neoplasm of scapula and long bones of upper arm |
| B304000          | Malignant neoplasm of scapula                             |
| B304100          | Malignant neoplasm of acromion                            |
| B304200          | Malignant neoplasm of humerus                             |
| B304300          | Malignant neoplasm of radius                              |
| B304400          | Malignant neoplasm of ulna                                |
| B304z00          | Malig neop of scapula and long bones of upper arm NOS     |
| B305.00          | Malignant neoplasm of hand bones                          |
| B305.11          | Malignant neoplasm of carpal bones                        |
| B305.12          | Malignant neoplasm of metacarpal bones                    |
| B305000          | Malignant neoplasm of carpal bone - scaphoid              |
| B305100          | Malignant neoplasm of carpal bone - lunate                |
| B305200          | Malignant neoplasm of carpal bone - triquetrum            |
| B305300          | Malignant neoplasm of carpal bone - pisiform              |
| B305400          | Malignant neoplasm of carpal bone - trapezium             |
| B305500          | Malignant neoplasm of carpal bone - trapezoid             |
| B305600          | Malignant neoplasm of carpal bone - capitate              |
| B305700          | Malignant neoplasm of carpal bone - hamate                |
| B305800          | Malignant neoplasm of first metacarpal bone               |
| B305900          | Malignant neoplasm of second metacarpal bone              |
| B305A00          | Malignant neoplasm of third metacarpal bone               |
| B305B00          | Malignant neoplasm of fourth metacarpal bone              |
| B305C00          | Malignant neoplasm of fifth metacarpal bone               |
| B305D00          | Malignant neoplasm of phalanges of hand                   |
| B305z00          | Malignant neoplasm of hand bones NOS                      |
| B306.00          | Malignant neoplasm of pelvic bones, sacrum and coccyx     |
| B306000          | Malignant neoplasm of ilium                               |
| B306100          | Malignant neoplasm of ischium                             |
| B306200          | Malignant neoplasm of pubis                               |
| B306300          | Malignant neoplasm of sacral vertebra                     |
| B306400          | Malignant neoplasm of coccygeal vertebra                  |
| B306500          | Malignant sacral teratoma                                 |
| B306z00          | Malignant neoplasm of pelvis, sacrum or coccyx NOS        |

| <b>Read Code</b> | <b>Description</b>                                           |
|------------------|--------------------------------------------------------------|
| B307.00          | Malignant neoplasm of long bones of leg                      |
| B307000          | Malignant neoplasm of femur                                  |
| B307100          | Malignant neoplasm of fibula                                 |
| B307200          | Malignant neoplasm of tibia                                  |
| B307z00          | Malignant neoplasm of long bones of leg NOS                  |
| B308.00          | Malignant neoplasm of short bones of leg                     |
| B308.11          | Malignant neoplasm of metatarsal bones of foot               |
| B308000          | Malignant neoplasm of patella                                |
| B308100          | Malignant neoplasm of talus                                  |
| B308200          | Malignant neoplasm of calcaneum                              |
| B308300          | Malignant neoplasm of medial cuneiform                       |
| B308400          | Malignant neoplasm of intermediate cuneiform                 |
| B308500          | Malignant neoplasm of lateral cuneiform                      |
| B308600          | Malignant neoplasm of cuboid                                 |
| B308700          | Malignant neoplasm of navicular                              |
| B308800          | Malignant neoplasm of first metatarsal bone                  |
| B308900          | Malignant neoplasm of second metatarsal bone                 |
| B308A00          | Malignant neoplasm of third metatarsal bone                  |
| B308B00          | Malignant neoplasm of fourth metatarsal bone                 |
| B308C00          | Malignant neoplasm of fifth metatarsal bone                  |
| B308D00          | Malignant neoplasm of phalanges of foot                      |
| B308z00          | Malignant neoplasm of short bones of leg NOS                 |
| B309.00          | Malignant neoplasm, overlap les bone and artic cart of limbs |
| B30W.00          | Malignant neoplasm/overlap lesion/bone+articulr cartilage    |
| B30X.00          | Malignant neoplasm/bones+articular cartilage/limb,unspfd     |
| B30z.00          | Malignant neoplasm of bone and articular cartilage NOS       |
| B30z000          | Osteosarcoma                                                 |
| B31..00          | Malignant neoplasm of connective and other soft tissue       |
| B310.00          | Malig neop of connective and soft tissue head, face and neck |
| B310000          | Malignant neoplasm of soft tissue of head                    |
| B310100          | Malignant neoplasm of soft tissue of face                    |
| B310200          | Malignant neoplasm of soft tissue of neck                    |
| B310300          | Malignant neoplasm of cartilage of ear                       |
| B310400          | Malignant neoplasm of tarsus of eyelid                       |
| B310500          | Malignant neoplasm soft tissues of cervical spine            |
| B310z00          | Malig neop connective and soft tissue head, face, neck NOS   |
| B311.00          | Malig neop connective and soft tissue upper limb/shoulder    |
| B311000          | Malignant neoplasm of connective and soft tissue of shoulder |
| B311100          | Malignant neoplasm of connective and soft tissue, upper arm  |
| B311200          | Malignant neoplasm of connective and soft tissue of fore-arm |
| B311300          | Malignant neoplasm of connective and soft tissue of hand     |
| B311400          | Malignant neoplasm of connective and soft tissue of finger   |

| <b>Read Code</b> | <b>Description</b>                                           |
|------------------|--------------------------------------------------------------|
| B311500          | Malignant neoplasm of connective and soft tissue of thumb    |
| B311z00          | Malig neop connective soft tissue upper limb/shoulder NOS    |
| B312.00          | Malig neop of connective and soft tissue of hip and leg      |
| B312000          | Malignant neoplasm of connective and soft tissue of hip      |
| B312100          | Malig neop of connective and soft tissue thigh and upper leg |
| B312200          | Malig neop connective and soft tissue of popliteal space     |
| B312300          | Malig neop of connective and soft tissue of lower leg        |
| B312400          | Malignant neoplasm of connective and soft tissue of foot     |
| B312500          | Malignant neoplasm of connective and soft tissue of toe      |
| B312600          | Malig neop of connective and soft tissue of great toe        |
| B312z00          | Malig neop connective and soft tissue hip and leg NOS        |
| B313.00          | Malignant neoplasm of connective and soft tissue of thorax   |
| B313000          | Malignant neoplasm of connective and soft tissue of axilla   |
| B313100          | Malignant neoplasm of diaphragm                              |
| B313200          | Malignant neoplasm of great vessels                          |
| B313300          | Malig neoplasm of connective and soft tissues of thor spine  |
| B313z00          | Malig neop of connective and soft tissue of thorax NOS       |
| B314.00          | Malignant neoplasm of connective and soft tissue of abdomen  |
| B314000          | Malig neop of connective and soft tissue of abdominal wall   |
| B314100          | Malig neoplasm of connective and soft tissues of lumb spine  |
| B314z00          | Malig neop of connective and soft tissue of abdomen NOS      |
| B315.00          | Malignant neoplasm of connective and soft tissue of pelvis   |
| B315000          | Malignant neoplasm of connective and soft tissue of buttock  |
| B315100          | Malig neop of connective and soft tissue of inguinal region  |
| B315200          | Malignant neoplasm of connective and soft tissue of perineum |
| B315300          | Malig neopl of connective and soft tissue - sacrum or coccyx |
| B315z00          | Malig neop of connective and soft tissue of pelvis NOS       |
| B316.00          | Malig neop of connective and soft tissue trunk unspecified   |
| B317.00          | Malignant neoplasm, overlap lesion connective & soft tissue  |
| B31y.00          | Malig neop connective and soft tissue other specified site   |
| B31z.00          | Malignant neoplasm of connective and soft tissue, site NOS   |
| B31z000          | Kaposi's sarcoma of soft tissue                              |
| B32..00          | Malignant melanoma of skin                                   |
| B320.00          | Malignant melanoma of lip                                    |
| B321.00          | Malignant melanoma of eyelid including canthus               |
| B322.00          | Malignant melanoma of ear and external auricular canal       |
| B322000          | Malignant melanoma of auricle (ear)                          |
| B322100          | Malignant melanoma of external auditory meatus               |
| B322z00          | Malignant melanoma of ear and external auricular canal NOS   |
| B323.00          | Malignant melanoma of other and unspecified parts of face    |
| B323000          | Malignant melanoma of external surface of cheek              |
| B323100          | Malignant melanoma of chin                                   |

| <b>Read Code</b> | <b>Description</b>                                  |
|------------------|-----------------------------------------------------|
| B323200          | Malignant melanoma of eyebrow                       |
| B323300          | Malignant melanoma of forehead                      |
| B323400          | Malignant melanoma of external surface of nose      |
| B323500          | Malignant melanoma of temple                        |
| B323z00          | Malignant melanoma of face NOS                      |
| B324.00          | Malignant melanoma of scalp and neck                |
| B324000          | Malignant melanoma of scalp                         |
| B324100          | Malignant melanoma of neck                          |
| B324z00          | Malignant melanoma of scalp and neck NOS            |
| B325.00          | Malignant melanoma of trunk (excluding scrotum)     |
| B325000          | Malignant melanoma of axilla                        |
| B325100          | Malignant melanoma of breast                        |
| B325200          | Malignant melanoma of buttock                       |
| B325300          | Malignant melanoma of groin                         |
| B325400          | Malignant melanoma of perianal skin                 |
| B325500          | Malignant melanoma of perineum                      |
| B325600          | Malignant melanoma of umbilicus                     |
| B325700          | Malignant melanoma of back                          |
| B325800          | Malignant melanoma of chest wall                    |
| B325z00          | Malignant melanoma of trunk, excluding scrotum, NOS |
| B326.00          | Malignant melanoma of upper limb and shoulder       |
| B326000          | Malignant melanoma of shoulder                      |
| B326100          | Malignant melanoma of upper arm                     |
| B326200          | Malignant melanoma of fore-arm                      |
| B326300          | Malignant melanoma of hand                          |
| B326400          | Malignant melanoma of finger                        |
| B326500          | Malignant melanoma of thumb                         |
| B326z00          | Malignant melanoma of upper limb or shoulder NOS    |
| B327.00          | Malignant melanoma of lower limb and hip            |
| B327000          | Malignant melanoma of hip                           |
| B327100          | Malignant melanoma of thigh                         |
| B327200          | Malignant melanoma of knee                          |
| B327300          | Malignant melanoma of popliteal fossa area          |
| B327400          | Malignant melanoma of lower leg                     |
| B327500          | Malignant melanoma of ankle                         |
| B327600          | Malignant melanoma of heel                          |
| B327700          | Malignant melanoma of foot                          |
| B327800          | Malignant melanoma of toe                           |
| B327900          | Malignant melanoma of great toe                     |
| B327z00          | Malignant melanoma of lower limb or hip NOS         |
| B328.00          | Malignant melanoma stage IA                         |
| B329.00          | Malignant melanoma stage IB                         |
| B32A.00          | Malignant melanoma stage IIA                        |
| B32B.00          | Malignant melanoma stage IIB                        |
| B32C.00          | Malignant melanoma stage IIC                        |

| <b>Read Code</b> | <b>Description</b>                                          |
|------------------|-------------------------------------------------------------|
| B32D.00          | Malignant melanoma stage IIIA                               |
| B32E.00          | Malignant melanoma stage IIIB                               |
| B32F.00          | Malignant melanoma stage IIIC                               |
| B32G.00          | Malignant melanoma stage IV M1a                             |
| B32H.00          | Malignant melanoma stage IV M1b                             |
| B32J.00          | Malignant melanoma stage IV M1c                             |
| B32y.00          | Malignant melanoma of other specified skin site             |
| B32y000          | Overlapping malignant melanoma of skin                      |
| B32z.00          | Malignant melanoma of skin NOS                              |
| B33..00          | Other malignant neoplasm of skin                            |
| B33..14          | Malignant neoplasm of sebaceous gland                       |
| B33..15          | Malignant neoplasm of sweat gland                           |
| B330.00          | Malignant neoplasm of skin of lip                           |
| B331.00          | Malignant neoplasm of eyelid including canthus              |
| B331000          | Malignant neoplasm of canthus                               |
| B331100          | Malignant neoplasm of upper eyelid                          |
| B331200          | Malignant neoplasm of lower eyelid                          |
| B332.00          | Malignant neoplasm skin of ear and external auricular canal |
| B332000          | Malignant neoplasm of skin of auricle (ear)                 |
| B332100          | Malignant neoplasm of skin of external auditory meatus      |
| B332200          | Malignant neoplasm of pinna NEC                             |
| B332z00          | Malig neop skin of ear and external auricular canal NOS     |
| B333.00          | Malignant neoplasm skin of other and unspecified parts face |
| B333000          | Malignant neoplasm of skin of cheek, external               |
| B333100          | Malignant neoplasm of skin of chin                          |
| B333200          | Malignant neoplasm of skin of eyebrow                       |
| B333300          | Malignant neoplasm of skin of forehead                      |
| B333400          | Malignant neoplasm of skin of nose (external)               |
| B333500          | Malignant neoplasm of skin of temple                        |
| B333z00          | Malignant neoplasm skin other and unspec part of face NOS   |
| B334.00          | Malignant neoplasm of scalp and skin of neck                |
| B334000          | Malignant neoplasm of scalp                                 |
| B334100          | Malignant neoplasm of skin of neck                          |
| B334z00          | Malignant neoplasm of scalp or skin of neck NOS             |
| B335.00          | Malignant neoplasm of skin of trunk, excluding scrotum      |
| B335000          | Malignant neoplasm of skin of axillary fold                 |
| B335100          | Malignant neoplasm of skin of chest, excluding breast       |
| B335200          | Malignant neoplasm of skin of breast                        |
| B335300          | Malignant neoplasm of skin of abdominal wall                |
| B335400          | Malignant neoplasm of skin of umbilicus                     |
| B335500          | Malignant neoplasm of skin of groin                         |
| B335600          | Malignant neoplasm of skin of perineum                      |
| B335700          | Malignant neoplasm of skin of back                          |
| B335800          | Malignant neoplasm of skin of buttock                       |
| B335900          | Malignant neoplasm of perianal skin                         |

| <b>Read Code</b> | <b>Description</b>                                          |
|------------------|-------------------------------------------------------------|
| B335A00          | Malignant neoplasm of skin of scapular region               |
| B335z00          | Malignant neoplasm of skin of trunk, excluding scrotum, NOS |
| B336.00          | Malignant neoplasm of skin of upper limb and shoulder       |
| B336000          | Malignant neoplasm of skin of shoulder                      |
| B336100          | Malignant neoplasm of skin of upper arm                     |
| B336200          | Malignant neoplasm of skin of fore-arm                      |
| B336300          | Malignant neoplasm of skin of hand                          |
| B336400          | Malignant neoplasm of skin of finger                        |
| B336500          | Malignant neoplasm of skin of thumb                         |
| B336z00          | Malignant neoplasm of skin of upper limb or shoulder NOS    |
| B337.00          | Malignant neoplasm of skin of lower limb and hip            |
| B337000          | Malignant neoplasm of skin of hip                           |
| B337100          | Malignant neoplasm of skin of thigh                         |
| B337200          | Malignant neoplasm of skin of knee                          |
| B337300          | Malignant neoplasm of skin of popliteal fossa area          |
| B337400          | Malignant neoplasm of skin of lower leg                     |
| B337500          | Malignant neoplasm of skin of ankle                         |
| B337600          | Malignant neoplasm of skin of heel                          |
| B337700          | Malignant neoplasm of skin of foot                          |
| B337800          | Malignant neoplasm of skin of toe                           |
| B337900          | Malignant neoplasm of skin of great toe                     |
| B337z00          | Malignant neoplasm of skin of lower limb or hip NOS         |
| B338.00          | Squamous cell carcinoma of skin                             |
| B339.00          | Dermatofibrosarcoma protuberans                             |
| B33A.00          | Stewart-Treves syndrome                                     |
| B33X.00          | Malignant neoplasm overlapping lesion of skin               |
| B33y.00          | Malignant neoplasm of other specified skin sites            |
| B33z.00          | Malignant neoplasm of skin NOS                              |
| B33z.11          | Squamous cell carcinoma of skin NOS                         |
| B33z000          | Kaposi's sarcoma of skin                                    |
| B34..00          | Malignant neoplasm of female breast                         |
| B34..11          | Ca female breast                                            |
| B340.00          | Malignant neoplasm of nipple and areola of female breast    |
| B340000          | Malignant neoplasm of nipple of female breast               |
| B340100          | Malignant neoplasm of areola of female breast               |
| B340z00          | Malignant neoplasm of nipple or areola of female breast NOS |
| B341.00          | Malignant neoplasm of central part of female breast         |
| B342.00          | Malignant neoplasm of upper-inner quadrant of female breast |
| B343.00          | Malignant neoplasm of lower-inner quadrant of female breast |
| B344.00          | Malignant neoplasm of upper-outer quadrant of female breast |
| B345.00          | Malignant neoplasm of lower-outer quadrant of female breast |

| Read Code | Description                                                |
|-----------|------------------------------------------------------------|
| B346.00   | Malignant neoplasm of axillary tail of female breast       |
| B347.00   | Malignant neoplasm, overlapping lesion of breast           |
| B34y.00   | Malignant neoplasm of other site of female breast          |
| B34y000   | Malignant neoplasm of ectopic site of female breast        |
| B34yz00   | Malignant neoplasm of other site of female breast NOS      |
| B34z.00   | Malignant neoplasm of female breast NOS                    |
| B35..00   | Malignant neoplasm of male breast                          |
| B350.00   | Malignant neoplasm of nipple and areola of male breast     |
| B350000   | Malignant neoplasm of nipple of male breast                |
| B350100   | Malignant neoplasm of areola of male breast                |
| B350z00   | Malignant neoplasm of nipple or areola of male breast NOS  |
| B35z.00   | Malignant neoplasm of other site of male breast            |
| B35z000   | Malignant neoplasm of ectopic site of male breast          |
| B35zz00   | Malignant neoplasm of male breast NOS                      |
| B36..00   | Local recurrence of malignant tumour of breast             |
| B3y..00   | Malig neop of bone, connective tissue, skin and breast OS  |
| B3z..00   | Malig neop of bone, connective tissue, skin and breast NOS |
| B4...00   | Malignant neoplasm of genitourinary organ                  |
| B4...11   | Carcinoma of genitourinary organ                           |
| B40..00   | Malignant neoplasm of uterus, part unspecified             |
| B41..00   | Malignant neoplasm of cervix uteri                         |
| B41..11   | Cervical carcinoma (uterus)                                |
| B410.00   | Malignant neoplasm of endocervix                           |
| B410000   | Malignant neoplasm of endocervical canal                   |
| B410100   | Malignant neoplasm of endocervical gland                   |
| B410z00   | Malignant neoplasm of endocervix NOS                       |
| B411.00   | Malignant neoplasm of exocervix                            |
| B412.00   | Malignant neoplasm, overlapping lesion of cervix uteri     |
| B41y.00   | Malignant neoplasm of other site of cervix                 |
| B41y000   | Malignant neoplasm of cervical stump                       |
| B41y100   | Malignant neoplasm of squamocolumnar junction of cervix    |
| B41yz00   | Malignant neoplasm of other site of cervix NOS             |
| B41z.00   | Malignant neoplasm of cervix uteri NOS                     |
| B42..00   | Malignant neoplasm of placenta                             |
| B420.00   | Choriocarcinoma                                            |
| B43..00   | Malignant neoplasm of body of uterus                       |
| B430.00   | Malignant neoplasm of corpus uteri, excluding isthmus      |
| B430000   | Malignant neoplasm of cornu of corpus uteri                |
| B430100   | Malignant neoplasm of fundus of corpus uteri               |
| B430200   | Malignant neoplasm of endometrium of corpus uteri          |
| B430211   | Malignant neoplasm of endometrium                          |
| B430300   | Malignant neoplasm of myometrium of corpus uteri           |
| B430z00   | Malignant neoplasm of corpus uteri NOS                     |
| B431.00   | Malignant neoplasm of isthmus of uterine body              |
| B431000   | Malignant neoplasm of lower uterine segment                |



| Read Code | Description                                                  |
|-----------|--------------------------------------------------------------|
| B431z00   | Malignant neoplasm of isthmus of uterine body NOS            |
| B432.00   | Malignant neoplasm of overlapping lesion of corpus uteri     |
| B43y.00   | Malignant neoplasm of other site of uterine body             |
| B43z.00   | Malignant neoplasm of body of uterus NOS                     |
| B44..00   | Malignant neoplasm of ovary and other uterine adnexa         |
| B440.00   | Malignant neoplasm of ovary                                  |
| B440.11   | Cancer of ovary                                              |
| B441.00   | Malignant neoplasm of fallopian tube                         |
| B442.00   | Malignant neoplasm of broad ligament                         |
| B443.00   | Malignant neoplasm of parametrium                            |
| B444.00   | Malignant neoplasm of round ligament                         |
| B44y.00   | Malignant neoplasm of other site of uterine adnexa           |
| B44z.00   | Malignant neoplasm of uterine adnexa NOS                     |
| B45..00   | Malig neop of other and unspecified female genital organs    |
| B450.00   | Malignant neoplasm of vagina                                 |
| B450000   | Malignant neoplasm of Gartner's duct                         |
| B450100   | Malignant neoplasm of vaginal vault                          |
| B450z00   | Malignant neoplasm of vagina NOS                             |
| B451.00   | Malignant neoplasm of labia majora                           |
| B451000   | Malignant neoplasm of greater vestibular (Bartholin's) gland |
| B451z00   | Malignant neoplasm of labia majora NOS                       |
| B452.00   | Malignant neoplasm of labia minora                           |
| B453.00   | Malignant neoplasm of clitoris                               |
| B454.00   | Malignant neoplasm of vulva unspecified                      |
| B454.11   | Primary vulval cancer                                        |
| B45X.00   | Malignant neoplasm/overlapping lesion/feml genital organs    |
| B45y.00   | Malignant neoplasm of other specified female genital organ   |
| B45y000   | Malignant neoplasm of overlapping lesion of vulva            |
| B45z.00   | Malignant neoplasm of female genital organ NOS               |
| B46..00   | Malignant neoplasm of prostate                               |
| B47..00   | Malignant neoplasm of testis                                 |
| B470.00   | Malignant neoplasm of undescended testis                     |
| B470000   | Malignant neoplasm of ectopic testis                         |
| B470100   | Malignant neoplasm of retained testis                        |
| B470200   | Seminoma of undescended testis                               |
| B470300   | Teratoma of undescended testis                               |
| B470z00   | Malignant neoplasm of undescended testis NOS                 |
| B471.00   | Malignant neoplasm of descended testis                       |
| B471000   | Seminoma of descended testis                                 |
| B471100   | Teratoma of descended testis                                 |
| B471z00   | Malignant neoplasm of descended testis NOS                   |
| B47z.00   | Malignant neoplasm of testis NOS                             |
| B47z.11   | Seminoma of testis                                           |
| B47z.12   | Teratoma of testis                                           |
| B48..00   | Malignant neoplasm of penis and other male genital organs    |

| <b>Read Code</b> | <b>Description</b>                                           |
|------------------|--------------------------------------------------------------|
| B480.00          | Malignant neoplasm of prepuce (foreskin)                     |
| B481.00          | Malignant neoplasm of glans penis                            |
| B482.00          | Malignant neoplasm of body of penis                          |
| B483.00          | Malignant neoplasm of penis, part unspecified                |
| B484.00          | Malignant neoplasm of epididymis                             |
| B485.00          | Malignant neoplasm of spermatic cord                         |
| B486.00          | Malignant neoplasm of scrotum                                |
| B487.00          | Malignant neoplasm, overlapping lesion of penis              |
| B48y.00          | Malignant neoplasm of other male genital organ               |
| B48y000          | Malignant neoplasm of seminal vesicle                        |
| B48y100          | Malignant neoplasm of tunica vaginalis                       |
| B48y200          | Malignant neoplasm, overlapping lesion male genital orgs     |
| B48yz00          | Malignant neoplasm of other male genital organ NOS           |
| B48z.00          | Malignant neoplasm of penis and other male genital organ NOS |
| B49..00          | Malignant neoplasm of urinary bladder                        |
| B490.00          | Malignant neoplasm of trigone of urinary bladder             |
| B491.00          | Malignant neoplasm of dome of urinary bladder                |
| B492.00          | Malignant neoplasm of lateral wall of urinary bladder        |
| B493.00          | Malignant neoplasm of anterior wall of urinary bladder       |
| B494.00          | Malignant neoplasm of posterior wall of urinary bladder      |
| B495.00          | Malignant neoplasm of bladder neck                           |
| B496.00          | Malignant neoplasm of ureteric orifice                       |
| B497.00          | Malignant neoplasm of urachus                                |
| B498.00          | Local recurrence of malignant tumour of urinary bladder      |
| B49y.00          | Malignant neoplasm of other site of urinary bladder          |
| B49y000          | Malignant neoplasm, overlapping lesion of bladder            |
| B49z.00          | Malignant neoplasm of urinary bladder NOS                    |
| B4A..00          | Malig neop of kidney and other unspecified urinary organs    |
| B4A..11          | Renal malignant neoplasm                                     |
| B4A0.00          | Malignant neoplasm of kidney parenchyma                      |
| B4A0000          | Hypernephroma                                                |
| B4A1.00          | Malignant neoplasm of renal pelvis                           |
| B4A1000          | Malignant neoplasm of renal calyces                          |
| B4A1100          | Malignant neoplasm of ureteropelvic junction                 |
| B4A1z00          | Malignant neoplasm of renal pelvis NOS                       |
| B4A2.00          | Malignant neoplasm of ureter                                 |
| B4A3.00          | Malignant neoplasm of urethra                                |
| B4A4.00          | Malignant neoplasm of paraurethral glands                    |
| B4Ay.00          | Malignant neoplasm of other urinary organs                   |
| B4Ay000          | Malignant neoplasm of overlapping lesion of urinary organs   |
| B4Az.00          | Malignant neoplasm of kidney or urinary organs NOS           |
| B4y..00          | Malignant neoplasm of genitourinary organ OS                 |
| B4z..00          | Malignant neoplasm of genitourinary organ NOS                |
| B5...00          | Malignant neoplasm of other and unspecified sites            |

| <b>Read Code</b> | <b>Description</b>                                           |
|------------------|--------------------------------------------------------------|
| B5...11          | Carcinoma of other and unspecified sites                     |
| B50..00          | Malignant neoplasm of eye                                    |
| B500.00          | Malig neop eyeball excl conjunctiva, cornea, retina, choroid |
| B500000          | Malignant neoplasm of ciliary body                           |
| B500100          | Malignant neoplasm of iris                                   |
| B500200          | Malignant neoplasm of crystalline lens                       |
| B500300          | Malignant neoplasm of sclera                                 |
| B500z00          | Malignant neoplasm of eyeball NOS                            |
| B501.00          | Malignant neoplasm of orbit                                  |
| B501000          | Malignant neoplasm of connective tissue of orbit             |
| B501100          | Malignant neoplasm of extraocular muscle of orbit            |
| B501z00          | Malignant neoplasm of orbit NOS                              |
| B502.00          | Malignant neoplasm of lacrimal gland                         |
| B503.00          | Malignant neoplasm of conjunctiva                            |
| B504.00          | Malignant neoplasm of cornea                                 |
| B505.00          | Malignant neoplasm of retina                                 |
| B506.00          | Malignant neoplasm of choroid                                |
| B507.00          | Malignant neoplasm of lacrimal duct                          |
| B507000          | Malignant neoplasm of lacrimal sac                           |
| B507100          | Malignant neoplasm of nasolacrimal duct                      |
| B507z00          | Malignant neoplasm of lacrimal duct NOS                      |
| B508.00          | Malignant neoplasm, overlapping lesion of eye and adnexa     |
| B509.00          | Malignant melanoma of eye                                    |
| B50y.00          | Malignant neoplasm of other specified site of eye            |
| B50z.00          | Malignant neoplasm of eye NOS                                |
| B51..00          | Malignant neoplasm of brain                                  |
| B51..11          | Cerebral tumour - malignant                                  |
| B510.00          | Malignant neoplasm cerebrum (excluding lobes and ventricles) |
| B510000          | Malignant neoplasm of basal ganglia                          |
| B510100          | Malignant neoplasm of cerebral cortex                        |
| B510200          | Malignant neoplasm of corpus striatum                        |
| B510300          | Malignant neoplasm of globus pallidus                        |
| B510400          | Malignant neoplasm of hypothalamus                           |
| B510500          | Malignant neoplasm of thalamus                               |
| B510z00          | Malignant neoplasm of cerebrum NOS                           |
| B511.00          | Malignant neoplasm of frontal lobe                           |
| B512.00          | Malignant neoplasm of temporal lobe                          |
| B512000          | Malignant neoplasm of hippocampus                            |
| B512100          | Malignant neoplasm of uncus                                  |
| B512z00          | Malignant neoplasm of temporal lobe NOS                      |
| B513.00          | Malignant neoplasm of parietal lobe                          |
| B514.00          | Malignant neoplasm of occipital lobe                         |
| B515.00          | Malignant neoplasm of cerebral ventricles                    |
| B515000          | Malignant neoplasm of choroid plexus                         |

| Read Code | Description                                                  |
|-----------|--------------------------------------------------------------|
| B515100   | Malignant neoplasm of floor of cerebral ventricle            |
| B515z00   | Malignant neoplasm of cerebral ventricle NOS                 |
| B516.00   | Malignant neoplasm of cerebellum                             |
| B517.00   | Malignant neoplasm of brain stem                             |
| B517000   | Malignant neoplasm of cerebral peduncle                      |
| B517100   | Malignant neoplasm of medulla oblongata                      |
| B517200   | Malignant neoplasm of midbrain                               |
| B517300   | Malignant neoplasm of pons                                   |
| B517z00   | Malignant neoplasm of brain stem NOS                         |
| B51y.00   | Malignant neoplasm of other parts of brain                   |
| B51y000   | Malignant neoplasm of corpus callosum                        |
| B51y100   | Malignant neoplasm of tapetum                                |
| B51y200   | Malignant neoplasm, overlapping lesion of brain              |
| B51yz00   | Malignant neoplasm of other part of brain NOS                |
| B51z.00   | Malignant neoplasm of brain NOS                              |
| B52..00   | Malig neopl of other and unspecified parts of nervous system |
| B520.00   | Malignant neoplasm of cranial nerves                         |
| B520000   | Malignant neoplasm of olfactory bulb                         |
| B520100   | Malignant neoplasm of optic nerve                            |
| B520200   | Malignant neoplasm of acoustic nerve                         |
| B520z00   | Malignant neoplasm of cranial nerves NOS                     |
| B521.00   | Malignant neoplasm of cerebral meninges                      |
| B521000   | Malignant neoplasm of cerebral dura mater                    |
| B521100   | Malignant neoplasm of cerebral arachnoid mater               |
| B521200   | Malignant neoplasm of cerebral pia mater                     |
| B521z00   | Malignant neoplasm of cerebral meninges NOS                  |
| B522.00   | Malignant neoplasm of spinal cord                            |
| B523.00   | Malignant neoplasm of spinal meninges                        |
| B523000   | Malignant neoplasm of spinal dura mater                      |
| B523100   | Malignant neoplasm of spinal arachnoid mater                 |
| B523200   | Malignant neoplasm of spinal pia mater                       |
| B523z00   | Malignant neoplasm of spinal meninges NOS                    |
| B524.00   | Malig neopl peripheral nerves and autonomic nervous system   |
| B524000   | Malignant neoplasm of peripheral nerves of head, face & neck |
| B524100   | Malignant neoplasm of peripheral nerve,upp limb,incl should  |
| B524200   | Malignant neoplasm of peripheral nerve of low limb, incl hip |
| B524300   | Malignant neoplasm of peripheral nerve of thorax             |
| B524400   | Malignant neoplasm of peripheral nerve of abdomen            |
| B524500   | Malignant neoplasm of peripheral nerve of pelvis             |
| B524600   | Malignant neoplasm,overlap lesion periph nerve & auton ns    |
| B524W00   | Mal neoplasm/periph nerves+autonomic nervous system,unspc    |
| B524X00   | Malignant neoplasm/peripheral nerves of trunk,unspecified    |

| Read Code | Description                                                  |
|-----------|--------------------------------------------------------------|
| B525.00   | Malignant neoplasm of cauda equina                           |
| B52W.00   | Malig neopl, overlap lesion brain & other part of CNS        |
| B52X.00   | Malignant neoplasm of meninges, unspecified                  |
| B52y.00   | Malignant neoplasm of other specified part of nervous system |
| B52z.00   | Malignant neoplasm of nervous system NOS                     |
| B53..00   | Malignant neoplasm of thyroid gland                          |
| B54..00   | Malig neop of other endocrine glands and related structures  |
| B540.00   | Malignant neoplasm of adrenal gland                          |
| B540.11   | Phaeochromocytoma                                            |
| B540000   | Malignant neoplasm of adrenal cortex                         |
| B540100   | Malignant neoplasm of adrenal medulla                        |
| B540z00   | Malignant neoplasm of adrenal gland NOS                      |
| B541.00   | Malignant neoplasm of parathyroid gland                      |
| B542.00   | Malignant neoplasm pituitary gland and craniopharyngeal duct |
| B542000   | Malignant neoplasm of pituitary gland                        |
| B542100   | Malignant neoplasm of craniopharyngeal duct                  |
| B542z00   | Malig neop pituitary gland or craniopharyngeal duct NOS      |
| B543.00   | Malignant neoplasm of pineal gland                           |
| B544.00   | Malignant neoplasm of carotid body                           |
| B545.00   | Malignant neoplasm of aortic body and other paraganglia      |
| B545000   | Malignant neoplasm of glomus jugulare                        |
| B545100   | Malignant neoplasm of aortic body                            |
| B545200   | Malignant neoplasm of coccygeal body                         |
| B545z00   | Malignant neoplasm of aortic body or paraganglia NOS         |
| B546.00   | Neuroblastoma                                                |
| B54X.00   | Malignant neoplasm-pluriglandular involvement,unspecified    |
| B54y.00   | Malignant neoplasm of other specified endocrine gland        |
| B54z.00   | Malig neop of endocrine gland or related structure NOS       |
| B55..00   | Malignant neoplasm of other and ill-defined sites            |
| B550.00   | Malignant neoplasm of head, neck and face                    |
| B550000   | Malignant neoplasm of head NOS                               |
| B550100   | Malignant neoplasm of cheek NOS                              |
| B550200   | Malignant neoplasm of nose NOS                               |
| B550300   | Malignant neoplasm of jaw NOS                                |
| B550400   | Malignant neoplasm of neck NOS                               |
| B550500   | Malignant neoplasm of supraclavicular fossa NOS              |
| B550z00   | Malignant neoplasm of head, neck and face NOS                |
| B551.00   | Malignant neoplasm of thorax                                 |
| B551000   | Malignant neoplasm of axilla NOS                             |
| B551100   | Malignant neoplasm of chest wall NOS                         |
| B551200   | Malignant neoplasm of intrathoracic site NOS                 |
| B551z00   | Malignant neoplasm of thorax NOS                             |
| B552.00   | Malignant neoplasm of abdomen                                |
| B553.00   | Malignant neoplasm of pelvis                                 |

| <b>Read Code</b> | <b>Description</b>                                           |
|------------------|--------------------------------------------------------------|
| B553000          | Malignant neoplasm of inguinal region NOS                    |
| B553100          | Malignant neoplasm of presacral region                       |
| B553200          | Malignant neoplasm of sacrococcygeal region                  |
| B553z00          | Malignant neoplasm of pelvis NOS                             |
| B554.00          | Malignant neoplasm of upper limb NOS                         |
| B555.00          | Malignant neoplasm of lower limb NOS                         |
| B55y.00          | Malignant neoplasm of other specified sites                  |
| B55y000          | Malignant neoplasm of back NOS                               |
| B55y100          | Malignant neoplasm of trunk NOS                              |
| B55y200          | Malignant neoplasm of flank NOS                              |
| B55yz00          | Malignant neoplasm of specified site NOS                     |
| B55z.00          | Malignant neoplasm of other and ill defined site NOS         |
| B56..00          | Secondary and unspecified malignant neoplasm of lymph nodes  |
| B56..11          | Lymph node metastases                                        |
| B560.00          | Secondary and unspec malig neop lymph nodes head/face/neck   |
| B560000          | Secondary and unspec malig neop of superficial parotid LN    |
| B560100          | Secondary and unspec malignant neoplasm mastoid lymph nodes  |
| B560200          | Secondary and unspec malig neop superficial cervical LN      |
| B560300          | Secondary and unspec malignant neoplasm occipital lymph node |
| B560400          | Secondary and unspec malig neop deep parotid lymph nodes     |
| B560500          | Secondary and unspec malig neop submandibular lymph nodes    |
| B560600          | Secondary and unspec malig neop of facial lymph nodes        |
| B560700          | Secondary and unspec malig neop submental lymph nodes        |
| B560800          | Secondary and unspec malig neop anterior cervical LN         |
| B560900          | Secondary and unspec malig neop deep cervical LN             |
| B560z00          | Secondary unspec malig neop lymph nodes head/face/neck NOS   |
| B561.00          | Secondary and unspec malig neop intrathoracic lymph nodes    |
| B561000          | Secondary and unspec malig neop internal mammary lymph nodes |
| B561100          | Secondary and unspec malig neop intercostal lymph nodes      |
| B561200          | Secondary and unspec malig neop diaphragmatic lymph nodes    |
| B561300          | Secondary and unspec malig neop ant mediastinal lymph nodes  |
| B561400          | Secondary and unspec malig neop post mediastinal lymph nodes |
| B561500          | Secondary and unspec malig neop paratracheal lymph nodes     |
| B561600          | Secondary and unspec malig neop superfic tracheobronchial LN |
| B561700          | Secondary and unspec malig neop inferior tracheobronchial LN |

| Read Code | Description                                                  |
|-----------|--------------------------------------------------------------|
| B561800   | Secondary and unspec malig neop bronchopulmonary lymph nodes |
| B561900   | Secondary and unspec malig neop pulmonary lymph nodes        |
| B561z00   | Secondary and unspec malig neop intrathoracic LN NOS         |
| B562.00   | Secondary and unspec malig neop intra-abdominal lymph nodes  |
| B562000   | Secondary and unspec malig neop coeliac lymph nodes          |
| B562100   | Secondary and unspec malig neop superficial mesenteric LN    |
| B562200   | Secondary and unspec malig neop inferior mesenteric LN       |
| B562300   | Secondary and unspec malig neop common iliac lymph nodes     |
| B562400   | Secondary and unspec malig neop external iliac lymph nodes   |
| B562z00   | Secondary and unspec malig neop intra-abdominal LN NOS       |
| B563.00   | Secondary and unspec malig neop axilla and upper limb LN     |
| B563000   | Secondary and unspec malig neop axillary lymph nodes         |
| B563100   | Secondary and unspec malig neop supratrochlear lymph nodes   |
| B563200   | Secondary and unspec malig neop infraclavicular lymph nodes  |
| B563300   | Secondary and unspec malig neop pectoral lymph nodes         |
| B563z00   | Secondary and unspec malig neop axilla and upper limb LN NOS |
| B564.00   | Secondary and unspec malig neop inguinal and lower limb LN   |
| B564000   | Secondary and unspec malig neop superficial inguinal LN      |
| B564100   | Secondary and unspec malig neop deep inguinal lymph nodes    |
| B564200   | Secondary and unspec malig neop popliteal lymph nodes        |
| B564z00   | Secondary and unspec malig neop of inguinal and leg LN NOS   |
| B565.00   | Secondary and unspec malig neop intrapelvic lymph nodes      |
| B565000   | Secondary and unspec malig neop internal iliac lymph nodes   |
| B565100   | Secondary and unspec malig neop inferior epigastric LN       |
| B565200   | Secondary and unspec malig neop circumflex iliac LN          |
| B565300   | Secondary and unspec malig neop sacral lymph nodes           |
| B565400   | Secondary and unspec malig neop obturator lymph nodes        |
| B565z00   | Secondary and unspec malig neop intrapelvic LN NOS           |
| B56y.00   | Secondary and unspec malig neop lymph nodes multiple sites   |
| B56z.00   | Secondary and unspec malig neop lymph nodes NOS              |
| B57..00   | Secondary malig neop of respiratory and digestive systems    |
| B57..11   | Metastases of respiratory and/or digestive systems           |
| B57..12   | Secondary carcinoma of respiratory and/or digestive systems  |
| B570.00   | Secondary malignant neoplasm of lung                         |
| B571.00   | Secondary malignant neoplasm of mediastinum                  |
| B572.00   | Secondary malignant neoplasm of pleura                       |

| Read Code | Description                                                  |
|-----------|--------------------------------------------------------------|
| B573.00   | Secondary malignant neoplasm of other respiratory organs     |
| B574.00   | Secondary malignant neoplasm of small intestine and duodenum |
| B574000   | Secondary malignant neoplasm of duodenum                     |
| B574100   | Secondary malignant neoplasm of jejunum                      |
| B574200   | Secondary malignant neoplasm of ileum                        |
| B574z00   | Secondary malig neop of small intestine or duodenum NOS      |
| B575.00   | Secondary malignant neoplasm of large intestine and rectum   |
| B575000   | Secondary malignant neoplasm of colon                        |
| B575100   | Secondary malignant neoplasm of rectum                       |
| B575z00   | Secondary malig neop of large intestine or rectum NOS        |
| B576.00   | Secondary malig neop of retroperitoneum and peritoneum       |
| B576000   | Secondary malignant neoplasm of retroperitoneum              |
| B576100   | Secondary malignant neoplasm of peritoneum                   |
| B576200   | Malignant ascites                                            |
| B576z00   | Secondary malig neop of retroperitoneum or peritoneum NOS    |
| B577.00   | Secondary malignant neoplasm of liver                        |
| B577.11   | Liver metastases                                             |
| B577000   | Secondary malignant neoplasm of liver intrahepatic bile duct |
| B57y.00   | Secondary malignant neoplasm of other digestive organ        |
| B57z.00   | Secondary malig neop of respiratory or digestive system NOS  |
| B58..00   | Secondary malignant neoplasm of other specified sites        |
| B58..11   | Secondary carcinoma of other specified sites                 |
| B580.00   | Secondary malignant neoplasm of kidney                       |
| B581.00   | Secondary malignant neoplasm of other urinary organs         |
| B581000   | Secondary malignant neoplasm of ureter                       |
| B581100   | Secondary malignant neoplasm of bladder                      |
| B581200   | Secondary malignant neoplasm of urethra                      |
| B581z00   | Secondary malignant neoplasm of other urinary organ NOS      |
| B582.00   | Secondary malignant neoplasm of skin                         |
| B582000   | Secondary malignant neoplasm of skin of head                 |
| B582100   | Secondary malignant neoplasm of skin of face                 |
| B582200   | Secondary malignant neoplasm of skin of neck                 |
| B582300   | Secondary malignant neoplasm of skin of trunk                |
| B582400   | Secondary malignant neoplasm of skin of shoulder and arm     |
| B582500   | Secondary malignant neoplasm of skin of hip and leg          |
| B582600   | Secondary malignant neoplasm of skin of breast               |
| B582z00   | Secondary malignant neoplasm of skin NOS                     |
| B583.00   | Secondary malignant neoplasm of brain and spinal cord        |
| B583000   | Secondary malignant neoplasm of brain                        |
| B583100   | Secondary malignant neoplasm of spinal cord                  |
| B583200   | Cerebral metastasis                                          |
| B583z00   | Secondary malignant neoplasm of brain or spinal cord NOS     |



| Read Code | Description                                                  |
|-----------|--------------------------------------------------------------|
| B584.00   | Secondary malignant neoplasm of other part of nervous system |
| B585.00   | Secondary malignant neoplasm of bone and bone marrow         |
| B585000   | Pathological fracture due to metastatic bone disease         |
| B586.00   | Secondary malignant neoplasm of ovary                        |
| B587.00   | Secondary malignant neoplasm of adrenal gland                |
| B58y.00   | Secondary malignant neoplasm of other specified sites        |
| B58y000   | Secondary malignant neoplasm of breast                       |
| B58y100   | Secondary malignant neoplasm of uterus                       |
| B58y200   | Secondary malignant neoplasm of cervix uteri                 |
| B58y211   | Secondary cancer of the cervix                               |
| B58y300   | Secondary malignant neoplasm of vagina                       |
| B58y400   | Secondary malignant neoplasm of vulva                        |
| B58y411   | Secondary cancer of the vulva                                |
| B58y500   | Secondary malignant neoplasm of prostate                     |
| B58y600   | Secondary malignant neoplasm of testis                       |
| B58y700   | Secondary malignant neoplasm of penis                        |
| B58y800   | Secondary malignant neoplasm of epididymis and vas deferens  |
| B58y900   | Secondary malignant neoplasm of tongue                       |
| B58yz00   | Secondary malignant neoplasm of other specified site NOS     |
| B58z.00   | Secondary malignant neoplasm of other specified site NOS     |
| B59..00   | Malignant neoplasm of unspecified site                       |
| B590.00   | Disseminated malignancy NOS                                  |
| B590.11   | Carcinomatosis                                               |
| B591.00   | Other malignant neoplasm NOS                                 |
| B592.00   | Malignant neoplasms of independent (primary) multiple sites  |
| B592X00   | Kaposi's sarcoma of multiple organs                          |
| B593.00   | Primary malignant neoplasm of unknown site                   |
| B594.00   | Secondary malignant neoplasm of unknown site                 |
| B595.00   | Malignant tumour of unknown origin                           |
| B59z.00   | Malignant neoplasm of unspecified site NOS                   |
| B59zX00   | Kaposi's sarcoma, unspecified                                |
| B5y..00   | Malignant neoplasm of other and unspecified site OS          |
| B5z..00   | Malignant neoplasm of other and unspecified site NOS         |
| B6...00   | Malignant neoplasm of lymphatic and haemopoietic tissue      |
| B6...11   | Malignant neoplasm of histiocytic tissue                     |
| B60..00   | Lymphosarcoma and reticulosarcoma                            |
| B600.00   | Reticulosarcoma                                              |
| B600000   | Reticulosarcoma of unspecified site                          |
| B600100   | Reticulosarcoma of lymph nodes of head, face and neck        |
| B600200   | Reticulosarcoma of intrathoracic lymph nodes                 |
| B600300   | Reticulosarcoma of intra-abdominal lymph nodes               |
| B600400   | Reticulosarcoma of lymph nodes of axilla and upper limb      |
| B600500   | Reticulosarcoma of lymph nodes of inguinal region and leg    |

| <b>Read Code</b> | <b>Description</b>                                           |
|------------------|--------------------------------------------------------------|
| B600600          | Reticulosarcoma of intrapelvic lymph nodes                   |
| B600700          | Reticulosarcoma of spleen                                    |
| B600800          | Reticulosarcoma of lymph nodes of multiple sites             |
| B600z00          | Reticulosarcoma NOS                                          |
| B601.00          | Lymphosarcoma                                                |
| B601000          | Lymphosarcoma of unspecified site                            |
| B601100          | Lymphosarcoma of lymph nodes of head, face and neck          |
| B601200          | Lymphosarcoma of intrathoracic lymph nodes                   |
| B601300          | Lymphosarcoma of intra-abdominal lymph nodes                 |
| B601400          | Lymphosarcoma of lymph nodes of axilla and upper limb        |
| B601500          | Lymphosarcoma of lymph nodes of inguinal region and leg      |
| B601600          | Lymphosarcoma of intrapelvic lymph nodes                     |
| B601700          | Lymphosarcoma of spleen                                      |
| B601800          | Lymphosarcoma of lymph nodes of multiple sites               |
| B601z00          | Lymphosarcoma NOS                                            |
| B602.00          | Burkitt's lymphoma                                           |
| B602000          | Burkitt's lymphoma of unspecified site                       |
| B602100          | Burkitt's lymphoma of lymph nodes of head, face and neck     |
| B602200          | Burkitt's lymphoma of intrathoracic lymph nodes              |
| B602300          | Burkitt's lymphoma of intra-abdominal lymph nodes            |
| B602400          | Burkitt's lymphoma of lymph nodes of axilla and upper limb   |
| B602500          | Burkitt's lymphoma of lymph nodes of inguinal region and leg |
| B602600          | Burkitt's lymphoma of intrapelvic lymph nodes                |
| B602700          | Burkitt's lymphoma of spleen                                 |
| B602800          | Burkitt's lymphoma of lymph nodes of multiple sites          |
| B602z00          | Burkitt's lymphoma NOS                                       |
| B60y.00          | Other specified reticulosarcoma or lymphosarcoma             |
| B60z.00          | Reticulosarcoma or lymphosarcoma NOS                         |
| B61..00          | Hodgkin's disease                                            |
| B61..11          | Hodgkin lymphoma                                             |
| B610.00          | Hodgkin's paragranuloma                                      |
| B610000          | Hodgkin's paragranuloma of unspecified site                  |
| B610100          | Hodgkin's paragranuloma of lymph nodes of head, face, neck   |
| B610200          | Hodgkin's paragranuloma of intrathoracic lymph nodes         |
| B610300          | Hodgkin's paragranuloma of intra-abdominal lymph nodes       |
| B610400          | Hodgkin's paragranuloma of lymph nodes of axilla and arm     |
| B610500          | Hodgkin's paragranuloma lymph nodes inguinal region and leg  |
| B610600          | Hodgkin's paragranuloma of intrapelvic lymph nodes           |
| B610700          | Hodgkin's paragranuloma of spleen                            |
| B610800          | Hodgkin's paragranuloma of lymph nodes of multiple sites     |
| B610z00          | Hodgkin's paragranuloma NOS                                  |
| B611.00          | Hodgkin's granuloma                                          |
| B611000          | Hodgkin's granuloma of unspecified site                      |

| <b>Read Code</b> | <b>Description</b>                                               |
|------------------|------------------------------------------------------------------|
| B611100          | Hodgkin's granuloma of lymph nodes of head, face and neck        |
| B611200          | Hodgkin's granuloma of intrathoracic lymph nodes                 |
| B611300          | Hodgkin's granuloma of intra-abdominal lymph nodes               |
| B611400          | Hodgkin's granuloma of lymph nodes of axilla and upper limb      |
| B611500          | Hodgkin's granuloma lymph nodes of inguinal region and leg       |
| B611600          | Hodgkin's granuloma of intrapelvic lymph nodes                   |
| B611700          | Hodgkin's granuloma of spleen                                    |
| B611800          | Hodgkin's granuloma of lymph nodes of multiple sites             |
| B611z00          | Hodgkin's granuloma NOS                                          |
| B612.00          | Hodgkin's sarcoma                                                |
| B612000          | Hodgkin's sarcoma of unspecified site                            |
| B612100          | Hodgkin's sarcoma of lymph nodes of head, face and neck          |
| B612200          | Hodgkin's sarcoma of intrathoracic lymph nodes                   |
| B612300          | Hodgkin's sarcoma of intra-abdominal lymph nodes                 |
| B612400          | Hodgkin's sarcoma of lymph nodes of axilla and upper limb        |
| B612500          | Hodgkin's sarcoma of lymph nodes of inguinal region and leg      |
| B612600          | Hodgkin's sarcoma of intrapelvic lymph nodes                     |
| B612700          | Hodgkin's sarcoma of spleen                                      |
| B612800          | Hodgkin's sarcoma of lymph nodes of multiple sites               |
| B612z00          | Hodgkin's sarcoma NOS                                            |
| B613.00          | Hodgkin's disease, lymphocytic-histiocytic predominance          |
| B613.11          | Hodgkin lymphoma, lymphocyte-rich                                |
| B613000          | Hodgkin's, lymphocytic-histiocytic predominance unspecified site |
| B613100          | Hodgkin's, lymphocytic-histiocytic pred of head, face, neck      |
| B613200          | Hodgkin's, lymphocytic-histiocytic pred intrathoracic nodes      |
| B613300          | Hodgkin's, lymphocytic-histiocytic pred intra-abdominal node     |
| B613400          | Hodgkin's, lymphocytic-histiocytic pred axilla and arm           |
| B613500          | Hodgkin's, lymphocytic-histiocytic pred inguinal and leg         |
| B613600          | Hodgkin's, lymphocytic-histiocytic pred intrapelvic nodes        |
| B613700          | Hodgkin's, lymphocytic-histiocytic predominance of spleen        |
| B613800          | Hodgkin's, lymphocytic-histiocytic pred of multiple sites        |
| B613z00          | Hodgkin's, lymphocytic-histiocytic predominance NOS              |
| B614.00          | Hodgkin's disease, nodular sclerosis                             |
| B614000          | Hodgkin's disease, nodular sclerosis of unspecified site         |
| B614100          | Hodgkin's nodular sclerosis of head, face and neck               |
| B614200          | Hodgkin's nodular sclerosis of intrathoracic lymph nodes         |
| B614300          | Hodgkin's nodular sclerosis of intra-abdominal lymph nodes       |
| B614400          | Hodgkin's nodular sclerosis of lymph nodes of axilla and arm     |
| B614500          | Hodgkin's nodular sclerosis of inguinal region and leg           |
| B614600          | Hodgkin's nodular sclerosis of intrapelvic lymph nodes           |
| B614700          | Hodgkin's disease, nodular sclerosis of spleen                   |

| <b>Read Code</b> | <b>Description</b>                                           |
|------------------|--------------------------------------------------------------|
| B614800          | Hodgkin's nodular sclerosis of lymph nodes of multiple sites |
| B614z00          | Hodgkin's disease, nodular sclerosis NOS                     |
| B615.00          | Hodgkin's disease, mixed cellularity                         |
| B615000          | Hodgkin's disease, mixed cellularity of unspecified site     |
| B615100          | Hodgkin's mixed cellularity of lymph nodes head, face, neck  |
| B615200          | Hodgkin's mixed cellularity of intrathoracic lymph nodes     |
| B615300          | Hodgkin's mixed cellularity of intra-abdominal lymph nodes   |
| B615400          | Hodgkin's mixed cellularity of lymph nodes of axilla and arm |
| B615500          | Hodgkin's mixed cellularity of lymph nodes inguinal and leg  |
| B615600          | Hodgkin's mixed cellularity of intrapelvic lymph nodes       |
| B615700          | Hodgkin's disease, mixed cellularity of spleen               |
| B615800          | Hodgkin's mixed cellularity of lymph nodes of multiple sites |
| B615z00          | Hodgkin's disease, mixed cellularity NOS                     |
| B616.00          | Hodgkin's disease, lymphocytic depletion                     |
| B616000          | Hodgkin's lymphocytic depletion of unspecified site          |
| B616100          | Hodgkin's lymphocytic depletion of head, face and neck       |
| B616200          | Hodgkin's lymphocytic depletion of intrathoracic lymph nodes |
| B616300          | Hodgkin's lymphocytic depletion intra-abdominal lymph nodes  |
| B616400          | Hodgkin's lymphocytic depletion lymph nodes axilla and arm   |
| B616500          | Hodgkin's lymphocytic depletion lymph nodes inguinal and leg |
| B616600          | Hodgkin's lymphocytic depletion of intrapelvic lymph nodes   |
| B616700          | Hodgkin's disease, lymphocytic depletion of spleen           |
| B616800          | Hodgkin's lymphocytic depletion lymph nodes multiple sites   |
| B616z00          | Hodgkin's disease, lymphocytic depletion NOS                 |
| B617.00          | Nodular lymphocyte predominant Hodgkin lymphoma              |
| B618.00          | Nodular sclerosis classical Hodgkin lymphoma                 |
| B619.00          | Mixed cellularity classical Hodgkin lymphoma                 |
| B61A.00          | Lymphocyte depleted classical Hodgkin lymphoma               |
| B61B.00          | Lymphocyte-rich classical Hodgkin lymphoma                   |
| B61C.00          | Other classical Hodgkin lymphoma                             |
| B61z.00          | Hodgkin's disease NOS                                        |
| B61z.11          | Hodgkin lymphoma NOS                                         |
| B61z000          | Hodgkin's disease NOS, unspecified site                      |
| B61z100          | Hodgkin's disease NOS of lymph nodes of head, face and neck  |
| B61z200          | Hodgkin's disease NOS of intrathoracic lymph nodes           |
| B61z300          | Hodgkin's disease NOS of intra-abdominal lymph nodes         |
| B61z400          | Hodgkin's disease NOS of lymph nodes of axilla and arm       |
| B61z500          | Hodgkin's disease NOS of lymph nodes inguinal region and leg |
| B61z600          | Hodgkin's disease NOS of intrapelvic lymph nodes             |
| B61z700          | Hodgkin's disease NOS of spleen                              |

| <b>Read Code</b> | <b>Description</b>                                          |
|------------------|-------------------------------------------------------------|
| B61z800          | Hodgkin's disease NOS of lymph nodes of multiple sites      |
| B61zz00          | Hodgkin's disease NOS                                       |
| B62..00          | Other malignant neoplasm of lymphoid and histiocytic tissue |
| B620.00          | Nodular lymphoma (Brill - Symmers disease)                  |
| B620.11          | Reticulosarcoma - follicular or nodular                     |
| B620000          | Nodular lymphoma of unspecified site                        |
| B620100          | Nodular lymphoma of lymph nodes of head, face and neck      |
| B620200          | Nodular lymphoma of intrathoracic lymph nodes               |
| B620300          | Nodular lymphoma of intra-abdominal lymph nodes             |
| B620400          | Nodular lymphoma of lymph nodes of axilla and upper limb    |
| B620500          | Nodular lymphoma of lymph nodes of inguinal region and leg  |
| B620600          | Nodular lymphoma of intrapelvic lymph nodes                 |
| B620700          | Nodular lymphoma of spleen                                  |
| B620800          | Nodular lymphoma of lymph nodes of multiple sites           |
| B620z00          | Nodular lymphoma NOS                                        |
| B621.00          | Mycosis fungoides                                           |
| B621000          | Mycosis fungoides of unspecified site                       |
| B621100          | Mycosis fungoides of the lymph nodes of head, face and neck |
| B621200          | Mycosis fungoides of intrathoracic lymph nodes              |
| B621300          | Mycosis fungoides of intra-abdominal lymph nodes            |
| B621400          | Mycosis fungoides of lymph nodes of axilla and upper limb   |
| B621500          | Mycosis fungoides of lymph nodes of inguinal region and leg |
| B621600          | Mycosis fungoides of intrapelvic lymph nodes                |
| B621700          | Mycosis fungoides of spleen                                 |
| B621800          | Mycosis fungoides of lymph nodes of multiple sites          |
| B621z00          | Mycosis fungoides NOS                                       |
| B622.00          | Sezary's disease                                            |
| B622.11          | Sezary disease                                              |
| B622000          | Sezary's disease of unspecified site                        |
| B622100          | Sezary's disease of lymph nodes of head, face and neck      |
| B622200          | Sezary's disease of intrathoracic lymph nodes               |
| B622300          | Sezary's disease of intra-abdominal lymph nodes             |
| B622400          | Sezary's disease of lymph nodes of axilla and upper limb    |
| B622500          | Sezary's disease of lymph nodes of inguinal region and leg  |
| B622600          | Sezary's disease of intrapelvic lymph nodes                 |
| B622700          | Sezary's disease of spleen                                  |
| B622800          | Sezary's disease of lymph nodes of multiple sites           |
| B622z00          | Sezary's disease NOS                                        |
| B623.00          | Malignant histiocytosis                                     |
| B623000          | Malignant histiocytosis of unspecified site                 |
| B623100          | Malignant histiocytosis of lymph nodes head, face and neck  |
| B623200          | Malignant histiocytosis of intrathoracic lymph nodes        |

| Read Code | Description                                                  |
|-----------|--------------------------------------------------------------|
| B623300   | Malignant histiocytosis of intra-abdominal lymph nodes       |
| B623400   | Malignant histiocytosis of lymph nodes of axilla and arm     |
| B623500   | Malignant histiocytosis of lymph nodes inguinal and leg      |
| B623600   | Malignant histiocytosis of intrapelvic lymph nodes           |
| B623700   | Malignant histiocytosis of spleen                            |
| B623800   | Malignant histiocytosis of lymph nodes of multiple sites     |
| B623z00   | Malignant histiocytosis NOS                                  |
| B624.00   | Leukaemic reticuloendotheliosis                              |
| B624.11   | Leukaemic reticuloendotheliosis                              |
| B624.12   | Hairy cell leukaemia                                         |
| B624000   | Leukaemic reticuloendotheliosis of unspecified sites         |
| B624100   | Leukaemic reticuloend of lymph nodes of head, face and neck  |
| B624200   | Leukaemic reticuloendotheliosis of intrathoracic lymph nodes |
| B624300   | Leukaemic reticuloend of intra-abdominal lymph nodes         |
| B624400   | Leukaemic reticuloend of lymph nodes of axilla and arm       |
| B624500   | Leukaemic reticuloend of lymph nodes inguinal region and leg |
| B624600   | Leukaemic reticuloendotheliosis of intrapelvic lymph nodes   |
| B624700   | Leukaemic reticuloendotheliosis of spleen                    |
| B624800   | Leukaemic reticuloend of lymph nodes of multiple sites       |
| B624z00   | Leukaemic reticuloendotheliosis NOS                          |
| B625.00   | Letterer-Siwe disease                                        |
| B625.11   | Histiocytosis X (acute, progressive)                         |
| B625000   | Letterer-Siwe disease of unspecified sites                   |
| B625100   | Letterer-Siwe disease of lymph nodes of head, face and neck  |
| B625200   | Letterer-Siwe disease of intrathoracic lymph nodes           |
| B625300   | Letterer-Siwe disease of intra-abdominal lymph nodes         |
| B625400   | Letterer-Siwe disease of lymph nodes of axilla and arm       |
| B625500   | Letterer-Siwe disease of lymph nodes inguinal region and leg |
| B625600   | Letterer-Siwe disease of intrapelvic lymph nodes             |
| B625700   | Letterer-Siwe disease of spleen                              |
| B625800   | Letterer-Siwe disease of lymph nodes of multiple sites       |
| B625z00   | Letterer-Siwe disease NOS                                    |
| B626.00   | Malignant mast cell tumours                                  |
| B626000   | Mast cell malignancy of unspecified site                     |
| B626100   | Mast cell malignancy of lymph nodes of head, face and neck   |
| B626200   | Mast cell malignancy of intrathoracic lymph nodes            |
| B626300   | Mast cell malignancy of intra-abdominal lymph nodes          |
| B626400   | Mast cell malignancy of lymph nodes of axilla and upper limb |
| B626500   | Mast cell malignancy of lymph nodes inguinal region and leg  |
| B626600   | Mast cell malignancy of intrapelvic lymph nodes              |

| <b>Read Code</b> | <b>Description</b>                                           |
|------------------|--------------------------------------------------------------|
| B626700          | Mast cell malignancy of spleen                               |
| B626800          | Mast cell malignancy of lymph nodes of multiple sites        |
| B626z00          | Malignant mast cell tumour NOS                               |
| B627.00          | Non - Hodgkin's lymphoma                                     |
| B627.11          | Non-Hodgkin lymphoma                                         |
| B627000          | Follicular non-Hodgkin's small cleaved cell lymphoma         |
| B627100          | Follicular non-Hodg mixed sml cleavd & lge cell lymphoma     |
| B627200          | Follicular non-Hodgkin's large cell lymphoma                 |
| B627300          | Diffuse non-Hodgkin's small cell (diffuse) lymphoma          |
| B627400          | Diffuse non-Hodgkin's small cleaved cell (diffuse) lymphoma  |
| B627500          | Diffuse non-Hodgkin mixed sml & lge cell (diffuse) lymphoma  |
| B627600          | Diffuse non-Hodgkin's immunoblastic (diffuse) lymphoma       |
| B627700          | Diffuse non-Hodgkin's lymphoblastic (diffuse) lymphoma       |
| B627800          | Diffuse non-Hodgkin's lymphoma undifferentiated (diffuse)    |
| B627900          | Mucosa-associated lymphoma                                   |
| B627911          | Maltoma                                                      |
| B627A00          | Diffuse non-Hodgkin's large cell lymphoma                    |
| B627B00          | Other types of follicular non-Hodgkin's lymphoma             |
| B627C00          | Follicular non-Hodgkin's lymphoma                            |
| B627C11          | Follicular lymphoma NOS                                      |
| B627D00          | Diffuse non-Hodgkin's centroblastic lymphoma                 |
| B627E00          | Diffuse large B-cell lymphoma                                |
| B627F00          | Extranod marg zone B-cell lymphom mucosa-assoc lymphoid tiss |
| B627G00          | Mediastinal (thymic) large B-cell lymphoma                   |
| B627W00          | Unspecified B-cell non-Hodgkin's lymphoma                    |
| B627X00          | Diffuse non-Hodgkin's lymphoma, unspecified                  |
| B628.00          | Follicular lymphoma                                          |
| B628000          | Follicular lymphoma grade 1                                  |
| B628100          | Follicular lymphoma grade 2                                  |
| B628200          | Follicular lymphoma grade 3                                  |
| B628300          | Follicular lymphoma grade 3a                                 |
| B628400          | Follicular lymphoma grade 3b                                 |
| B628500          | Diffuse follicle centre lymphoma                             |
| B628600          | Cutaneous follicle centre lymphoma                           |
| B628700          | Other types of follicular lymphoma                           |
| B629.00          | Multifocal multisystemic dissem Langerhans-cell histiocytosi |
| B62A.00          | Sarcoma of dendritic cells                                   |
| B62B.00          | Multifocal and unisystemic Langerhans-cell histiocytosis     |
| B62C.00          | Unifocal Langerhans-cell histiocytosis                       |
| B62D.00          | Histiocytic sarcoma                                          |
| B62E.00          | T/NK-cell lymphoma                                           |
| B62E000          | Mature T/NK-cell lymphoma                                    |

| <b>Read Code</b> | <b>Description</b>                                           |
|------------------|--------------------------------------------------------------|
| B62E100          | Anaplastic large cell lymphoma, ALK-positive                 |
| B62E200          | Anaplastic large cell lymphoma, ALK-negative                 |
| B62E300          | Cutaneous T-cell lymphoma                                    |
| B62E400          | Extranodal NK/T-cell lymphoma, nasal type                    |
| B62E500          | Hepatosplenic T-cell lymphoma                                |
| B62E600          | Enteropathy-associated T-cell lymphoma                       |
| B62E611          | Enteropathy-type (intestinal) T-cell lymphoma                |
| B62E700          | Subcutaneous panniculitic T-cell lymphoma                    |
| B62E711          | Subcutaneous panniculitis-like T-cell lymphoma               |
| B62E800          | Blastic NK-cell lymphoma                                     |
| B62E900          | Angioimmunoblastic T-cell lymphoma                           |
| B62EA00          | Primary cutaneous CD30-positive T-cell proliferations        |
| B62Ew00          | Other mature T/NK-cell lymphoma                              |
| B62F.00          | Nonfollicular lymphoma                                       |
| B62F.11          | Non-follicular lymphoma                                      |
| B62F000          | Small cell B-cell lymphoma                                   |
| B62F100          | Mantle cell lymphoma                                         |
| B62F200          | Lymphoblastic (diffuse) lymphoma                             |
| B62Fy00          | Other non-follicular lymphoma                                |
| B62x.00          | Malignant lymphoma otherwise specified                       |
| B62x000          | T-zone lymphoma                                              |
| B62x100          | Lymphoepithelioid lymphoma                                   |
| B62x200          | Peripheral T-cell lymphoma                                   |
| B62x300          | Malignant reticuloendotheliosis                              |
| B62x400          | Malignant reticulosis                                        |
| B62x500          | Malignant immunoproliferative small intestinal disease       |
| B62x600          | True histiocytic lymphoma                                    |
| B62xX00          | Oth and unspecif peripheral & cutaneous T-cell lymphomas     |
| B62y.00          | Malignant lymphoma NOS                                       |
| B62y000          | Malignant lymphoma NOS of unspecified site                   |
| B62y100          | Malignant lymphoma NOS of lymph nodes of head, face and neck |
| B62y200          | Malignant lymphoma NOS of intrathoracic lymph nodes          |
| B62y300          | Malignant lymphoma NOS of intra-abdominal lymph nodes        |
| B62y400          | Malignant lymphoma NOS of lymph nodes of axilla and arm      |
| B62y500          | Malignant lymphoma NOS of lymph node inguinal region and leg |
| B62y600          | Malignant lymphoma NOS of intrapelvic lymph nodes            |
| B62y700          | Malignant lymphoma NOS of spleen                             |
| B62y800          | Malignant lymphoma NOS of lymph nodes of multiple sites      |
| B62yz00          | Malignant lymphoma NOS                                       |
| B62z.00          | Malignant neoplasms of lymphoid and histiocytic tissue NOS   |
| B62z000          | Unspec malig neop lymphoid/histiocytic of unspecified site   |
| B62z100          | Unspec malig neop lymphoid/histiocytic lymph node head/neck  |



| Read Code | Description                                                  |
|-----------|--------------------------------------------------------------|
| B62z200   | Unspec malig neop lymphoid/histiocytic of intrathoracic node |
| B62z300   | Unspec malig neop lymphoid/histiocytic intra-abdominal nodes |
| B62z400   | Unspec malig neop lymphoid/histiocytic lymph node axilla/arm |
| B62z500   | Unspec malig neop lymphoid/histiocytic nodes inguinal/leg    |
| B62z600   | Unspec malig neop lymphoid/histiocytic of intrapelvic nodes  |
| B62z700   | Unspec malig neop lymphoid/histiocytic of spleen             |
| B62z800   | Unspec malig neop lymphoid/histiocytic of multiple sites     |
| B62zz00   | Lymphoid and histiocytic malignancy NOS                      |
| B62zz11   | Immunoproliferative neoplasm                                 |
| B63..00   | Multiple myeloma and immunoproliferative neoplasms           |
| B630.00   | Multiple myeloma                                             |
| B630.11   | Kahler's disease                                             |
| B630.12   | Myelomatosis                                                 |
| B630000   | Malignant plasma cell neoplasm, extramedullary plasmacytoma  |
| B630011   | Extramedullary plasmacytoma                                  |
| B630100   | Solitary myeloma                                             |
| B630200   | Plasmacytoma NOS                                             |
| B630300   | Lambda light chain myeloma                                   |
| B630400   | Solitary plasmacytoma                                        |
| B631.00   | Plasma cell leukaemia                                        |
| B63y.00   | Other immunoproliferative neoplasms                          |
| B63z.00   | Immunoproliferative neoplasm or myeloma NOS                  |
| B64..00   | Lymphoid leukaemia                                           |
| B64..11   | Lymphatic leukaemia                                          |
| B640.00   | Acute lymphoid leukaemia                                     |
| B640000   | B-cell acute lymphoblastic leukaemia                         |
| B640011   | Mature B-cell leukaemia Burkitt-type                         |
| B641.00   | Chronic lymphoid leukaemia                                   |
| B641.11   | Chronic lymphatic leukaemia                                  |
| B641000   | B-cell chronic lymphocytic leukaemia                         |
| B641011   | Chronic lymphocytic leukaemia of B-cell type                 |
| B641100   | Clinical stage A chronic lymphocytic leukaemia               |
| B641200   | Clinical stage B chronic lymphocytic leukaemia               |
| B641300   | Clinical stage C chronic lymphocytic leukaemia               |
| B642.00   | Subacute lymphoid leukaemia                                  |
| B64y.00   | Other lymphoid leukaemia                                     |
| B64y000   | Aleukaemic lymphoid leukaemia                                |
| B64y100   | Prolymphocytic leukaemia                                     |
| B64y200   | Adult T-cell leukaemia                                       |
| B64y300   | B-cell prolymphocytic leukaemia                              |
| B64y311   | Prolymphocytic leukaemia of B-cell type                      |
| B64y400   | T-cell prolymphocytic leukaemia                              |

| Read Code | Description                                          |
|-----------|------------------------------------------------------|
| B64y411   | Prolymphocytic leukaemia of T-cell type              |
| B64y500   | Adult T-cell lymphoma/leukaemia (HTLV-1-associated)  |
| B64yz00   | Other lymphoid leukaemia NOS                         |
| B64z.00   | Lymphoid leukaemia NOS                               |
| B65..00   | Myeloid leukaemia                                    |
| B650.00   | Acute myeloid leukaemia                              |
| B650000   | Acute myeloid leukaemia with 11q23 abnormality       |
| B650100   | Acute myeloid leukaemia with multilineage dysplasia  |
| B651.00   | Chronic myeloid leukaemia                            |
| B651.11   | Chronic granulocytic leukaemia                       |
| B651000   | Chronic eosinophilic leukaemia                       |
| B651100   | Chronic myeloid leukaemia, BCR/ABL positive          |
| B651200   | Chronic neutrophilic leukaemia                       |
| B651300   | Atypical chronic myeloid leukaemia, BCR/ABL negative |
| B651z00   | Chronic myeloid leukaemia NOS                        |
| B652.00   | Subacute myeloid leukaemia                           |
| B653.00   | Myeloid sarcoma                                      |
| B653000   | Chloroma                                             |
| B653100   | Granulocytic sarcoma                                 |
| B653z00   | Myeloid sarcoma NOS                                  |
| B654.00   | Acute myeloblastic leukaemia                         |
| B65y.00   | Other myeloid leukaemia                              |
| B65y000   | Aleukaemic myeloid leukaemia                         |
| B65y100   | Acute promyelocytic leukaemia                        |
| B65yz00   | Other myeloid leukaemia NOS                          |
| B65z.00   | Myeloid leukaemia NOS                                |
| B66..00   | Monocytic leukaemia                                  |
| B66..11   | Histiocytic leukaemia                                |
| B66..12   | Monoblastic leukaemia                                |
| B660.00   | Acute monocytic leukaemia                            |
| B661.00   | Chronic monocytic leukaemia                          |
| B662.00   | Subacute monocytic leukaemia                         |
| B663.00   | Acute monoblastic leukaemia                          |
| B66y.00   | Other monocytic leukaemia                            |
| B66y000   | Aleukaemic monocytic leukaemia                       |
| B66yz00   | Other monocytic leukaemia NOS                        |
| B66z.00   | Monocytic leukaemia NOS                              |
| B67..00   | Other specified leukaemia                            |
| B670.00   | Acute erythraemia and erythroleukaemia               |
| B670.11   | Di Guglielmo's disease                               |
| B671.00   | Chronic erythraemia                                  |
| B671.11   | Heilmeyer - Schoner disease                          |
| B672.00   | Megakaryocytic leukaemia                             |
| B672.11   | Thrombocytic leukaemia                               |
| B673.00   | Mast cell leukaemia                                  |

| Read Code | Description                                               |
|-----------|-----------------------------------------------------------|
| B674.00   | Acute panmyelosis                                         |
| B67y.00   | Other and unspecified leukaemia                           |
| B67y000   | Lymphosarcoma cell leukaemia                              |
| B67yz00   | Other and unspecified leukaemia NOS                       |
| B67z.00   | Other specified leukaemia NOS                             |
| B68..00   | Leukaemia of unspecified cell type                        |
| B680.00   | Acute leukaemia NOS                                       |
| B681.00   | Chronic leukaemia NOS                                     |
| B682.00   | Subacute leukaemia NOS                                    |
| B68y.00   | Other leukaemia of unspecified cell type                  |
| B68z.00   | Leukaemia NOS                                             |
| B69..00   | Myelomonocytic leukaemia                                  |
| B690.00   | Acute myelomonocytic leukaemia                            |
| B691.00   | Chronic myelomonocytic leukaemia                          |
| B692.00   | Subacute myelomonocytic leukaemia                         |
| B693.00   | Juvenile myelomonocytic leukaemia                         |
| B6y..00   | Malignant neoplasm lymphatic or haematopoietic tissue OS  |
| B6y0.00   | Myeloproliferative disorder                               |
| B6y0.11   | Myeloproliferative disease                                |
| B6y1.00   | Myelosclerosis with myeloid metaplasia                    |
| B6y1.11   | Megakaryocytic myelosclerosis                             |
| B6y1.12   | Osteomyelofibrosis                                        |
| B6z..00   | Malignant neoplasm lymphatic or haematopoietic tissue NOS |
| B6z0.00   | Kaposi's sarcoma of lymph nodes                           |
| B7z..00   | Benign neoplasm of other and unspecified site             |
| B7z0.00   | Benign neoplasm of lymph nodes                            |
| B8...00   | Carcinoma in situ                                         |
| B8...12   | Erythroplasia                                             |
| B8...13   | Queyrats's erythroplasia                                  |
| B80..00   | Carcinoma in situ of digestive organs                     |
| B80..11   | Ca-in-situ of G.I. tract                                  |
| B800.00   | Carcinoma in situ of lip, oral cavity and pharynx         |
| B800.11   | Carcinoma in situ of oral cavity                          |
| B800.12   | Carcinoma in situ of pharynx                              |
| B800000   | Carcinoma in situ of lip                                  |
| B800100   | Carcinoma in situ of tongue                               |
| B800200   | Carcinoma in situ of salivary glands                      |
| B800300   | Carcinoma in situ of gums                                 |
| B800400   | Carcinoma in situ of floor of mouth                       |
| B800500   | Carcinoma in situ of cheek                                |
| B800600   | Carcinoma in situ of palate                               |
| B800700   | Carcinoma in situ of nasopharynx                          |
| B800800   | Carcinoma in situ of oropharynx                           |
| B800900   | Carcinoma in situ of hypopharynx                          |

| <b>Read Code</b> | <b>Description</b>                                          |
|------------------|-------------------------------------------------------------|
| B800z00          | Carcinoma in situ of lip, oral cavity and pharynx NOS       |
| B801.00          | Carcinoma in situ of oesophagus                             |
| B801000          | Carcinoma in situ of upper 1/3 oesophagus                   |
| B801100          | Carcinoma in situ of middle 1/3 oesophagus                  |
| B801200          | Carcinoma in situ of lower 1/3 oesophagus                   |
| B801z00          | Carcinoma in situ of oesophagus NOS                         |
| B802.00          | Carcinoma in situ of stomach                                |
| B802000          | Carcinoma in situ of cardia of stomach                      |
| B802100          | Carcinoma in situ of fundus of stomach                      |
| B802200          | Carcinoma in situ of body of stomach                        |
| B802300          | Carcinoma in situ of pyloric antrum                         |
| B802400          | Carcinoma in situ of pyloric canal                          |
| B802z00          | Carcinoma in situ of stomach NOS                            |
| B803.00          | Carcinoma in situ of colon                                  |
| B803000          | Carcinoma in situ of hepatic flexure of colon               |
| B803100          | Carcinoma in situ of transverse colon                       |
| B803200          | Carcinoma in situ of descending colon                       |
| B803300          | Carcinoma in situ of sigmoid colon                          |
| B803400          | Carcinoma in situ of caecum                                 |
| B803500          | Carcinoma in situ of appendix                               |
| B803600          | Carcinoma in situ of ascending colon                        |
| B803700          | Carcinoma in situ of splenic flexure of colon               |
| B803800          | High grade dysplasia of colon                               |
| B803z00          | Carcinoma in situ of colon NOS                              |
| B804.00          | Carcinoma in situ of rectum and rectosigmoid junction       |
| B804000          | Carcinoma in situ of rectosigmoid junction                  |
| B804100          | Carcinoma in situ of rectum                                 |
| B804z00          | Carcinoma in situ of rectum or rectosigmoid junction NOS    |
| B805.00          | Carcinoma in situ of anal canal                             |
| B805000          | Anal intraepithelial neoplasia grade III                    |
| B806.00          | Carcinoma in situ of anus NOS                               |
| B807.00          | Carcinoma in situ of other and unspecified small intestine  |
| B807000          | Carcinoma in situ of duodenum                               |
| B807100          | Carcinoma in situ of jejunum                                |
| B807200          | Carcinoma in situ of ileum                                  |
| B807300          | Carcinoma in situ of Meckel's diverticulum                  |
| B807z00          | Carcinoma in situ other and unspecified small intestine NOS |
| B808.00          | Carcinoma in situ of liver and biliary system               |
| B808.11          | Carcinoma in situ of biliary system                         |
| B808000          | Carcinoma in situ of liver                                  |
| B808100          | Carcinoma in situ of intrahepatic bile ducts                |
| B808200          | Carcinoma in situ of hepatic duct                           |
| B808300          | Carcinoma in situ of gall bladder                           |
| B808400          | Carcinoma in situ of cystic duct                            |
| B808500          | Carcinoma in situ of common bile duct                       |

| <b>Read Code</b> | <b>Description</b>                                           |
|------------------|--------------------------------------------------------------|
| B808600          | Carcinoma in situ of ampulla of Vater                        |
| B808700          | Carcinoma in situ of sphincter of Oddi                       |
| B808z00          | Carcinoma in situ of liver or biliary system NOS             |
| B80z.00          | Carcinoma in situ of other and unspecified digestive organs  |
| B80z000          | Carcinoma in situ of pancreas                                |
| B80z100          | Carcinoma in situ of spleen                                  |
| B80zz00          | Carcinoma in situ of digestive organs NOS                    |
| B81..00          | Carcinoma in situ of respiratory system                      |
| B810.00          | Carcinoma in situ of larynx                                  |
| B810000          | Carcinoma in situ of thyroid cartilage                       |
| B810100          | Carcinoma in situ of cricoid cartilage                       |
| B810200          | Carcinoma in situ of epiglottis                              |
| B810300          | Carcinoma in situ of arytenoid cartilage                     |
| B810400          | Carcinoma in situ of corniculate cartilage                   |
| B810500          | Carcinoma in situ of cuneiform cartilage                     |
| B810600          | Carcinoma in situ of aryepiglottic fold                      |
| B810700          | Carcinoma in situ of vestibular fold                         |
| B810800          | Carcinoma in situ of vocal fold - glottis                    |
| B810811          | Carcinoma in situ of glottis                                 |
| B810z00          | Carcinoma in situ of larynx NOS                              |
| B811.00          | Carcinoma in situ of trachea                                 |
| B812.00          | Carcinoma in situ of bronchus and lung                       |
| B812000          | Carcinoma in situ of carina of bronchus                      |
| B812100          | Carcinoma in situ of main bronchus                           |
| B812200          | Carcinoma in situ of upper lobe bronchus and lung            |
| B812300          | Carcinoma in situ of middle lobe bronchus and lung           |
| B812400          | Carcinoma in situ of lower lobe bronchus and lung            |
| B812z00          | Carcinoma in situ of bronchus or lung NOS                    |
| B81y.00          | Carcinoma in situ of other specified part respiratory system |
| B81y.11          | Carcinoma in situ of nasal sinuses                           |
| B81y000          | Carcinoma in situ of pleura                                  |
| B81y100          | Carcinoma in situ of nasal cavity                            |
| B81y200          | Carcinoma in situ of tympanic cavity                         |
| B81y300          | Carcinoma in situ of tympanic antrum                         |
| B81y400          | Carcinoma in situ of Eustachian tube                         |
| B81y500          | Carcinoma in situ of mastoid air cells                       |
| B81y600          | Carcinoma in situ of maxillary sinus                         |
| B81y700          | Carcinoma in situ of ethmoidal sinus                         |
| B81y800          | Carcinoma in situ of frontal sinus                           |
| B81y900          | Carcinoma in situ of sphenoidal sinus                        |
| B81yz00          | Carcinoma in situ of specified parts respiratory system NOS  |
| B81z.00          | Carcinoma in situ of respiratory organ NOS                   |
| B82..00          | Carcinoma in situ of skin                                    |
| B820.00          | Carcinoma in situ of skin of lip                             |
| B821.00          | Carcinoma in situ of skin of eyelid including canthus        |

| <b>Read Code</b> | <b>Description</b>                                         |
|------------------|------------------------------------------------------------|
| B822.00          | Carcinoma in situ skin of ear and external auricular canal |
| B822.11          | Carcinoma in situ of ear                                   |
| B822000          | Carcinoma in situ of skin of auricle                       |
| B822100          | Carcinoma in situ of skin of external auricular canal      |
| B822z00          | Carcinoma in situ skin of ear/external auricular canal NOS |
| B823.00          | Carcinoma in situ of skin of other parts of face           |
| B823000          | Carcinoma in situ of skin of forehead skin                 |
| B823100          | Carcinoma in situ of skin of eyebrow                       |
| B823300          | Carcinoma in situ of skin of cheek                         |
| B823400          | Carcinoma in situ of skin of nose                          |
| B823500          | Carcinoma in situ of skin of temple                        |
| B823600          | Carcinoma in situ of skin of jaw                           |
| B823z00          | Carcinoma in situ of skin of other parts of face NOS       |
| B824.00          | Carcinoma in situ of scalp and skin of neck                |
| B824000          | Carcinoma in situ of scalp                                 |
| B824100          | Carcinoma in situ of skin of neck                          |
| B824z00          | Carcinoma in situ of scalp or skin of neck NOS             |
| B825.00          | Carcinoma in situ of skin of trunk, excluding scrotum      |
| B825000          | Carcinoma in situ of skin of breast                        |
| B825100          | Carcinoma in situ of skin of chest wall NOS                |
| B825200          | Carcinoma in situ of skin of axilla                        |
| B825300          | Carcinoma in situ of skin of back                          |
| B825400          | Carcinoma in situ of skin of abdominal wall                |
| B825500          | Carcinoma in situ of skin of groin                         |
| B825600          | Carcinoma in situ of skin of perineum                      |
| B825700          | Carcinoma in situ of skin of buttock                       |
| B825800          | Carcinoma in situ of perianal skin                         |
| B825z00          | Carcinoma in situ of skin of trunk NOS                     |
| B826.00          | Carcinoma in situ of skin of upper limb and shoulder       |
| B826000          | Carcinoma in situ of skin of shoulder                      |
| B826100          | Carcinoma in situ of skin of upper arm                     |
| B826200          | Carcinoma in situ of skin of lower arm                     |
| B826300          | Carcinoma in situ of skin of hand                          |
| B826z00          | Carcinoma in situ of skin of upper limb or shoulder NOS    |
| B827.00          | Carcinoma in situ of skin of lower limb and hip            |
| B827.11          | Carcinoma in situ of skin of leg                           |
| B827000          | Carcinoma in situ of skin of hip                           |
| B827100          | Carcinoma in situ of skin of thigh                         |
| B827200          | Carcinoma in situ of skin of knee                          |
| B827300          | Carcinoma in situ of skin of lower leg                     |
| B827400          | Carcinoma in situ of skin of foot                          |
| B827z00          | Carcinoma in situ of skin of lower limb or hip NOS         |
| B828.00          | Melanoma in situ of skin                                   |
| B828000          | Melanoma in situ of lip                                    |
| B828100          | Melanoma in situ of eyelid, including canthus              |

| <b>Read Code</b> | <b>Description</b>                                           |
|------------------|--------------------------------------------------------------|
| B828200          | Melanoma in situ of ear and external auricular canal         |
| B828300          | Melanoma in situ of scalp and neck                           |
| B828400          | Melanoma in situ of trunk                                    |
| B828500          | Melanoma in situ of upper limb, including shoulder           |
| B828600          | Melanoma in situ of lower limb, including hip                |
| B828700          | Melanoma in situ of scalp                                    |
| B828800          | Melanoma in situ of back of hand                             |
| B828900          | Melanoma in situ of back                                     |
| B828W00          | Melanoma in situ, unspecified                                |
| B828X00          | Melanoma in situ of other and unspecified parts of face      |
| B82y.00          | Carcinoma in situ of other specified sites of skin           |
| B82z.00          | Carcinoma in situ of skin NOS                                |
| B83.00           | Carcinoma in situ of breast and genitourinary system         |
| B830.00          | Carcinoma in situ of breast                                  |
| B830000          | Lobular carcinoma in situ of breast                          |
| B830100          | Intraductal carcinoma in situ of breast                      |
| B831.00          | Carcinoma in situ of cervix uteri                            |
| B831.11          | CIN III - carcinoma in situ of cervix                        |
| B831.12          | Cervical intraepithelial neoplasia                           |
| B831.13          | Cervical intraepithelial neoplasia grade III                 |
| B831000          | Carcinoma in situ of endocervix                              |
| B831100          | Carcinoma in situ of exocervix                               |
| B832.00          | Carcinoma in situ of other and unspecified parts of uterus   |
| B832.11          | Carcinoma in situ of body of uterus                          |
| B832000          | Carcinoma in situ of endometrium                             |
| B833.00          | Carcinoma in situ other and unspecified female genital organ |
| B833000          | Carcinoma in situ of ovary                                   |
| B833100          | Carcinoma in situ of fallopian tube                          |
| B833200          | Carcinoma in situ of vagina                                  |
| B833300          | Carcinoma in situ of vulva                                   |
| B833311          | Vulval intraepithelial neoplasia                             |
| B833400          | Vulval intraepithel neop grd 1                               |
| B833500          | Vulval intraepithel neop grd 2                               |
| B833600          | Vulval intraepithel neop grd 3                               |
| B833700          | Vaginal intraepithelial neoplasia grade 1                    |
| B833800          | Vaginal intraepithelial neoplasia grade 2                    |
| B833900          | Vaginal intraepithelial neoplasia grade 3                    |
| B833z00          | Carcinoma in situ of female genital organs NOS               |
| B834.00          | Carcinoma in situ of prostate                                |
| B834000          | High grade prostatic intraepithelial neoplasia               |
| B834100          | Prostatic intraepithelial neoplasia                          |
| B835.00          | Carcinoma in situ of penis                                   |
| B836.00          | Carcinoma in situ other and unspecified male genital organs  |
| B836000          | Carcinoma in situ of testis                                  |

| <b>Read Code</b> | <b>Description</b>                                           |
|------------------|--------------------------------------------------------------|
| B836100          | Carcinoma in situ of epididymis                              |
| B836200          | Carcinoma in situ of spermatic cord                          |
| B836300          | Carcinoma in situ of scrotum                                 |
| B836z00          | Carcinoma in situ of male genital organs NOS                 |
| B837.00          | Carcinoma in situ of bladder                                 |
| B83z.00          | Carcinoma in situ of urinary organs NOS                      |
| B8y..00          | Carcinoma in situ of other and unspecified sites             |
| B8y0.00          | Carcinoma in situ of eye                                     |
| B8yy.00          | Carcinoma in situ of other specified site                    |
| B8yy000          | Carcinoma in situ of thyroid gland                           |
| B8yy100          | Carcinoma in situ of adrenal gland                           |
| B8yy200          | Carcinoma in situ of parathyroid gland                       |
| B8yy300          | Carcinoma in situ of pituitary gland                         |
| B8yyz00          | Carcinoma in situ of other specified site NOS                |
| B8z..00          | Carcinoma in situ NOS                                        |
| B9...00          | Neoplasms of uncertain behaviour                             |
| B90..00          | Neop uncertain behaviour of digestive and respiratory system |
| B900.00          | Neoplasm of uncertain behaviour of major salivary glands     |
| B900000          | Neoplasm of uncertain behaviour of parotid gland             |
| B900011          | Mixed parotid tumour                                         |
| B900100          | Neoplasm of uncertain behaviour of sublingual gland          |
| B900200          | Neoplasm of uncertain behaviour of submandibular gland       |
| B900z00          | Neoplasm of uncertain behaviour of major salivary gland NOS  |
| B901.00          | Neop of uncertain behaviour of lip, oral cavity and pharynx  |
| B901.11          | Neoplasm of uncertain behaviour of oral cavity               |
| B901.12          | Neoplasm of uncertain behaviour of pharynx                   |
| B901000          | Neoplasm of uncertain behaviour of lip                       |
| B901100          | Neoplasm of uncertain behaviour of tongue                    |
| B901200          | Neoplasm of uncertain behaviour of minor salivary gland      |
| B901300          | Neoplasm of uncertain behaviour of gums                      |
| B901400          | Neoplasm of uncertain behaviour of floor of mouth            |
| B901500          | Neoplasm of uncertain behaviour of cheek                     |
| B901600          | Neoplasm of uncertain behaviour of palate                    |
| B901700          | Neoplasm of uncertain behaviour of nasopharynx               |
| B901800          | Neoplasm of uncertain behaviour of oropharynx                |
| B901900          | Neoplasm of uncertain behaviour of hypopharynx               |
| B901z00          | Neop of uncertain behaviour lip, oral cavity and pharynx NOS |
| B902.00          | Neop of uncertain behaviour stomach, intestines and rectum   |
| B902000          | Neoplasm of uncertain behaviour of stomach                   |
| B902100          | Neoplasm of uncertain behaviour of duodenum                  |
| B902200          | Neoplasm of uncertain behaviour of jejunum                   |
| B902300          | Neoplasm of uncertain behaviour of ileum                     |
| B902400          | Neoplasm of uncertain behaviour of colon                     |



| <b>Read Code</b> | <b>Description</b>                                           |
|------------------|--------------------------------------------------------------|
| B902500          | Neoplasm of uncertain behaviour of rectum                    |
| B902600          | Neoplasm of uncertain or unknown behaviour of appendix       |
| B902z00          | Neop of uncertain behaviour stomach, intestine or rectum NOS |
| B903.00          | Neoplasm of uncertain behaviour of liver and biliary passage |
| B903.11          | Neoplasm of uncertain behaviour of biliary system            |
| B903000          | Neoplasm of uncertain behaviour of liver                     |
| B903100          | Neoplasm of uncertain behaviour of intra-hepatic bile ducts  |
| B903200          | Neoplasm of uncertain behaviour of hepatic duct              |
| B903300          | Neoplasm of uncertain behaviour of gall bladder              |
| B903400          | Neoplasm of uncertain behaviour of cystic duct               |
| B903500          | Neoplasm of uncertain behaviour of common bile duct          |
| B903600          | Neoplasm of uncertain behaviour of ampulla of Vater          |
| B903700          | Neoplasm of uncertain behaviour of sphincter of Oddi         |
| B903z00          | Neop of uncertain behaviour of liver or biliary passages NOS |
| B904.00          | Neop of uncertain behaviour retroperitoneum and peritoneum   |
| B904000          | Neoplasm of uncertain behaviour of retroperitoneum           |
| B904100          | Neoplasm of uncertain behaviour of peritoneum                |
| B904z00          | Neop uncertain behaviour retroperitoneum or peritoneum NOS   |
| B905.00          | Neop of uncertain behaviour other and unspec digestive organ |
| B905000          | Neoplasm of uncertain behaviour of oesophagus                |
| B905100          | Neoplasm of uncertain behaviour of pancreas                  |
| B905200          | Neoplasm of uncertain behaviour of anal canal and sphincter  |
| B905300          | Neoplasm of uncertain behaviour of spleen                    |
| B905400          | Gastrointestinal stromal tumour                              |
| B905z00          | Neop uncertain behaviour other unspec digestive organ NOS    |
| B906.00          | Neoplasm of uncertain behaviour of larynx                    |
| B906000          | Neoplasm of uncertain behaviour of thyroid cartilage         |
| B906100          | Neoplasm of uncertain behaviour of cricoid cartilage         |
| B906200          | Neoplasm of uncertain behaviour of epiglottis                |
| B906300          | Neoplasm of uncertain behaviour of arytenoid cartilage       |
| B906400          | Neoplasm of uncertain behaviour of corniculate cartilage     |
| B906500          | Neoplasm of uncertain behaviour of cuneiform cartilage       |
| B906600          | Neoplasm of uncertain behaviour of aryepiglottic fold        |
| B906700          | Neoplasm of uncertain behaviour of vestibular fold           |
| B906800          | Neoplasm of uncertain behaviour of vocal cord                |
| B906z00          | Neoplasm of uncertain behaviour of larynx NOS                |
| B907.00          | Neoplasm of uncertain behaviour trachea, bronchus and lung   |
| B907000          | Neoplasm of uncertain behaviour of trachea                   |
| B907100          | Neoplasm of uncertain behaviour of bronchus                  |

| <b>Read Code</b> | <b>Description</b>                                           |
|------------------|--------------------------------------------------------------|
| B907200          | Neoplasm of uncertain behaviour of lung                      |
| B907z00          | Neop of uncertain behaviour of trachea, bronchus or lung NOS |
| B908.00          | Neop of uncertain behaviour pleura, thymus and mediastinum   |
| B908000          | Neoplasm of uncertain behaviour of pleura                    |
| B908100          | Neoplasm of uncertain behaviour of thymus                    |
| B908200          | Neoplasm of uncertain behaviour of mediastinum               |
| B90z.00          | Neoplasm of uncertain behaviour of respiratory organs OS/NOS |
| B90z000          | Neoplasm of uncertain behaviour of nasal cavity              |
| B90z100          | Neoplasm of uncertain behaviour of tympanic cavity           |
| B90z200          | Neoplasm of uncertain behaviour of tympanic antrum           |
| B90z300          | Neoplasm of uncertain behaviour of eustachian tube           |
| B90z400          | Neoplasm of uncertain behaviour of mastoid air cells         |
| B90z500          | Neoplasm of uncertain behaviour of maxillary sinus           |
| B90z600          | Neoplasm of uncertain behaviour of ethmoidal sinus           |
| B90z700          | Neoplasm of uncertain behaviour of frontal sinus             |
| B90z800          | Neoplasm of uncertain behaviour of sphenoidal sinus          |
| B90zz00          | Neop uncertain behaviour digestive or respiratory system NOS |
| B91..00          | Neoplasm of uncertain behaviour of genitourinary organs      |
| B910.00          | Neoplasm of uncertain behaviour of uterus                    |
| B911.00          | Neoplasm of uncertain behaviour of placenta                  |
| B911000          | Malignant hydatidiform mole                                  |
| B911011          | Choriadenoma (destruens)                                     |
| B911012          | Invasive mole - placenta                                     |
| B911013          | Choriocarcinoma                                              |
| B911100          | Epithelioid trophoblastic tumour                             |
| B911z00          | Uncertain neoplasm of placenta NOS                           |
| B912.00          | Neoplasm of uncertain behaviour of ovary                     |
| B913.00          | Neoplasm of uncertain behaviour other female genital organs  |
| B913000          | Neoplasm of uncertain behaviour of vagina                    |
| B913100          | Neoplasm of uncertain behaviour of vulva                     |
| B913z00          | Neoplasm of uncertain behaviour of female genital organs NOS |
| B914.00          | Neoplasm of uncertain behaviour of testis                    |
| B915.00          | Neoplasm of uncertain behaviour of prostate                  |
| B916.00          | Neoplasm of uncertain behaviour of other male genital organs |
| B916000          | Neoplasm of uncertain behaviour of penis                     |
| B916100          | Neoplasm of uncertain behaviour of epididymis                |
| B916200          | Neoplasm of uncertain behaviour of scrotum                   |
| B916z00          | Neoplasm of uncertain behaviour of male genital organs NOS   |
| B917.00          | Neoplasm of uncertain behaviour of bladder                   |

| <b>Read Code</b> | <b>Description</b>                                           |
|------------------|--------------------------------------------------------------|
| B917.12          | Transitional cell papilloma of bladder                       |
| B917000          | Bladder polyp                                                |
| B91z.00          | Neoplasm of uncertain behaviour of urinary organs OS/NOS     |
| B91z.11          | Neoplasm of uncertain behaviour of urinary organ NOS         |
| B91z000          | Uncertain neoplasm urethra                                   |
| B91z100          | Neoplasm of uncertain behaviour of kidney                    |
| B91z111          | Renal neoplasm of uncertain behaviour                        |
| B91z200          | Uncertain neoplasm ureter                                    |
| B91z300          | Neoplasm of uncertain or unknown behaviour of renal pelvis   |
| B91zz00          | Uncertain neoplasm of urinary organ NOS                      |
| B92..00          | Neop of uncertain behaviour of endocrine and nervous system  |
| B92..11          | Neoplasm of uncertain behaviour of nervous system            |
| B920.00          | Neop uncertain behaviour pituitary and craniopharyngeal duct |
| B920000          | Neoplasm of uncertain behaviour of pituitary gland           |
| B920100          | Neoplasm of uncertain behaviour of craniopharyngeal duct     |
| B920z00          | Neop uncertain behaviour pituitary and craniopharyngeal NOS  |
| B921.00          | Neoplasm of uncertain behaviour of pineal gland              |
| B922.00          | Neoplasm of uncertain behaviour of adrenal gland             |
| B923.00          | Neoplasm of uncertain behaviour of paraganglia               |
| B923000          | Neoplasm of uncertain behaviour of carotid body              |
| B923100          | Neoplasm of uncertain behaviour of glomus jugulare           |
| B923200          | Neoplasm of uncertain behaviour of aortic body               |
| B923300          | Neoplasm of uncertain behaviour of coccygeal body            |
| B923z00          | Neoplasm of uncertain behaviour of paraganglia NOS           |
| B924.00          | Neoplasm of uncertain behaviour other/unsp. endocrine glands |
| B924000          | Neoplasm of uncertain behaviour of thyroid gland             |
| B924100          | Neoplasm of uncertain behaviour of parathyroid gland         |
| B924z00          | Neoplasm of uncertain behaviour of endocrine gland NOS       |
| B925.00          | Neoplasm of uncertain behaviour of brain and spinal cord     |
| B925000          | Neoplasm of uncertain behaviour of brain                     |
| B925100          | Neoplasm of uncertain behaviour of spinal cord               |
| B925200          | Neoplasm of uncertain or unknown behav brain, supratentorial |
| B925300          | Neoplasm uncert / unkn behav brain, infratentorial           |
| B925z00          | Neoplasm of uncertain behaviour of brain or spinal cord NOS  |
| B926.00          | Neoplasm of uncertain behaviour of meninges                  |
| B926000          | Neoplasm of uncertain behaviour of cerebral meninges         |
| B926100          | Neoplasm of uncertain behaviour of spinal meninges           |
| B926z00          | Neoplasm of uncertain behaviour of meninges NOS              |
| B927.00          | Neurofibromatosis - Von Recklinghausen's disease             |
| B927.11          | Von Recklinghausen's disease                                 |

| Read Code | Description                                                  |
|-----------|--------------------------------------------------------------|
| B927.12   | Neurofibromatosis type 1                                     |
| B928.00   | Neopl uncert/unkn behav of periph nerves & autonom nerv sys  |
| B929.00   | Neurofibromatosis type 2                                     |
| B92z.00   | Neoplasm of uncertain behaviour of nervous system OS/NOS     |
| B92z000   | Neoplasm of uncertain behaviour of cranial nerves            |
| B92zz00   | Neoplasm of uncertain behaviour of nervous system NOS        |
| B93..00   | Neop uncertain behaviour other and unspec sites and tissues  |
| B930.00   | Neop of uncertain behaviour of bone and articular cartilage  |
| B930000   | Neoplasm of uncertain behaviour of bone                      |
| B930100   | Neoplasm of uncertain behaviour of articular cartilage       |
| B930z00   | Neop uncertain behaviour of bone or articular cartilage NOS  |
| B931.00   | Neop of uncertain behaviour connective and other soft tissue |
| B932.00   | Neoplasm of uncertain behaviour of skin                      |
| B933.00   | Neoplasm of uncertain behaviour of breast                    |
| B933.11   | Cystosarcoma phyllodes                                       |
| B934.00   | Polycythaemia vera                                           |
| B934.11   | Polycythaemia rubra vera                                     |
| B934.12   | Primary polycythaemia                                        |
| B935.00   | Neoplasm of uncertain behaviour of histiocytic and mast cell |
| B935.11   | Histiocytic tumour NOS                                       |
| B935.12   | Mastocytoma NOS                                              |
| B936.00   | Neoplasm of uncertain behaviour of plasma cells              |
| B936.11   | Myeloma - solitary                                           |
| B936.12   | Plasmacytoma NOS                                             |
| B937.00   | Neop uncertain behaviour other lymphatic/haematopoietic tiss |
| B937.11   | Neoplasm of uncertain behaviour of blood                     |
| B937.12   | Idiopathic thrombocythaemia                                  |
| B937.13   | Megakaryocytic myelosclerosis                                |
| B937.14   | Myelodysplasia                                               |
| B937000   | Refractory anaemia without sideroblasts, so stated           |
| B937100   | Refractory anaemia with sideroblasts                         |
| B937200   | Refractory anaemia with excess of blasts                     |
| B937300   | Refractory anaemia with excess of blasts with transformation |
| B937W00   | Myelodysplastic syndrome, unspecified                        |
| B937W11   | Myelodysplasia                                               |
| B93X.00   | Neo/uncertn+unknwn behav/lymph,h'matopetc+rel tiss,unspcf    |
| BA...00   | Unspecified nature neoplasm                                  |
| BA0..00   | Neoplasm of unspecified nature                               |
| BA00.00   | Neoplasm of unspecified nature of digestive system           |
| BA01.00   | Neoplasm of unspecified nature of respiratory system         |

| <b>Read Code</b> | <b>Description</b>                                           |
|------------------|--------------------------------------------------------------|
| BA02.00          | Neoplasm of unspecified nature of bone, skin and soft tissue |
| BA02000          | Neoplasm of unspecified nature of bone                       |
| BA02100          | Neoplasm of unspecified nature of soft tissue                |
| BA02200          | Neoplasm of unspecified nature of skin                       |
| BA02z00          | Neoplasm of unspec nature of bone, skin or soft tissue NOS   |
| BA03.00          | Neoplasm of unspecified nature of breast                     |
| BA04.00          | Neoplasm of unspecified nature of bladder                    |
| BA05.00          | Neoplasm of unspecified nature of other genitourinary organs |
| BA06.00          | Neoplasm of unspecified nature of brain                      |
| BA07.00          | Neop unspec nature of endocrine glands, other nervous system |
| BA0y.00          | Neoplasm of unspecified nature of other specified sites      |
| BA0z.00          | Neoplasm of unspecified nature NOS                           |
| BB01.00          | [M]Neoplasm, uncertain whether benign or malignant           |
| BB02.00          | [M]Neoplasm, malignant                                       |
| BB03.00          | [M]Neoplasm, metastatic                                      |
| BB03.11          | [M]Secondary neoplasm                                        |
| BB03.12          | [M]Tumour embolus                                            |
| BB03.13          | [M]Tumour embolism                                           |
| BB04.00          | [M]Neoplasm, malig, uncertain whether primary or metastatic  |
| BB06.00          | [M]Tumour cells, uncertain whether benign or malignant       |
| BB07.00          | [M]Tumour cells, malignant                                   |
| BB08.00          | [M]Malignant tumour, small cell type                         |
| BB09.00          | [M]Malignant tumour, giant cell type                         |
| BB0A.00          | [M]Malignant tumour, fusiform cell type                      |
| BB11.11          | [M]Intraepithelial carcinoma NOS                             |
| BB12.00          | [M]Carcinoma NOS                                             |
| BB13.00          | [M]Carcinoma, metastatic, NOS                                |
| BB13.11          | [M]Secondary carcinoma                                       |
| BB14.00          | [M]Carcinomatosis                                            |
| BB16.00          | [M]Epithelioma, malignant                                    |
| BB17.00          | [M]Large cell carcinoma NOS                                  |
| BB18.00          | [M]Carcinoma, undifferentiated type, NOS                     |
| BB19.00          | [M]Carcinoma, anaplastic type, NOS                           |
| BB1A.00          | [M]Pleomorphic carcinoma                                     |
| BB1B.00          | [M]Giant cell and spindle cell carcinoma                     |
| BB1C.00          | [M]Giant cell carcinoma                                      |
| BB1D.00          | [M]Spindle cell carcinoma                                    |
| BB1E.00          | [M]Pseudosarcomatous carcinoma                               |
| BB1F.00          | [M]Polygonal cell carcinoma                                  |
| BB1G.00          | [M]Spheroidal cell carcinoma                                 |
| BB1H.00          | [M]Tumourlet                                                 |
| BB1J.00          | [M]Small cell carcinoma NOS                                  |
| BB1J.11          | [M]Reserve cell carcinoma                                    |

| Read Code | Description                                                 |
|-----------|-------------------------------------------------------------|
| BB1J.12   | [M]Round cell carcinoma                                     |
| BB1K.00   | [M]Oat cell carcinoma                                       |
| BB1L.00   | [M]Small cell carcinoma, fusiform cell type                 |
| BB1M.00   | [M]Small cell carcinoma, intermediate cell                  |
| BB1N.00   | [M]Small cell-large cell carcinoma                          |
| BB1P.00   | [M]Non-small cell carcinoma                                 |
| BB1z.00   | [M]Unspecified epithelial neoplasm                          |
| BB2..12   | [M]Squamous cell neoplasms                                  |
| BB2A.00   | [M]Squamous cell carcinoma NOS                              |
| BB2B.00   | [M]Squamous cell carcinoma, metastatic NOS                  |
| BB2C.00   | [M]Squamous cell carcinoma, keratinising type NOS           |
| BB2D.00   | [M]Squamous cell carcinoma, large cell, non-keratinising    |
| BB2E.00   | [M]Squamous cell carcinoma, small cell, non-keratinising    |
| BB2F.00   | [M]Squamous cell carcinoma, spindle cell type               |
| BB2J.00   | [M]Squamous cell carcinoma, microinvasive                   |
| BB2N.00   | [M]Intraepit neop,grade III,of cervix, vulva and vagina     |
| BB37.00   | [M]Intraepidermal epithelioma of Jadassohn                  |
| BB4..00   | [M]Transitional cell papillomas and carcinomas              |
| BB40.00   | [M]Transitional cell papilloma NOS                          |
| BB41.00   | [M]Urothelial papilloma                                     |
| BB41.11   | [M]Urinary bladder papilloma                                |
| BB42.00   | [M]Transitional cell carcinoma in situ                      |
| BB43.00   | [M]Transitional cell carcinoma NOS                          |
| BB43.11   | [M]Urothelial carcinoma                                     |
| BB44.00   | [M]Schneiderian papilloma                                   |
| BB45.00   | [M]Transitional cell papilloma, inverted type               |
| BB46.00   | [M]Schneiderian carcinoma                                   |
| BB47.00   | [M]Transitional cell carcinoma, spindle cell type           |
| BB48.00   | [M]Basaloid carcinoma                                       |
| BB49.00   | [M]Cloacogenic carcinoma                                    |
| BB4A.00   | [M]Papillary transitional cell carcinoma                    |
| BB4B.00   | [M]Grade 1 (Stage pTa) papillary urothelial/transit cell ca |
| BB4C.00   | [M]Grade 2 (Stage pTa) papillary urothelial/transit cell ca |
| BB4D.00   | [M]Grade 3 (Stage pTa) papillary urothelial/transit cell ca |
| BB4z.00   | [M]Transitional cell papilloma or carcinoma NOS             |
| BB5..00   | [M]Adenomas and adenocarcinomas                             |
| BB5..11   | [M]Adenocarcinomas                                          |
| BB51.00   | [M]Adenocarcinoma in situ                                   |
| BB51000   | [M]Adenocarcinoma in situ in villous adenoma                |
| BB51100   | [M]Adenocarcinoma in situ in tubulovillous adenoma          |
| BB52.00   | [M]Adenocarcinoma NOS                                       |
| BB52000   | [M]Adenocarcinoma in tubulovillous adenoma                  |
| BB53.00   | [M]Adenocarcinoma, metastatic, NOS                          |
| BB54.00   | [M]Scirrhou adenocarcinoma                                  |
| BB55.00   | [M]Linitis plastica                                         |

| Read Code | Description                                                 |
|-----------|-------------------------------------------------------------|
| BB56.00   | [M]Superficial spreading adenocarcinoma                     |
| BB57.00   | [M]Adenocarcinoma, intestinal type                          |
| BB58.00   | [M]Carcinoma, diffuse type                                  |
| BB5B.00   | [M]Pancreatic adenomas and carcinomas                       |
| BB5B300   | [M]Insulinoma, malignant                                    |
| BB5B311   | [M]Beta-cell tumour, malignant                              |
| BB5B500   | [M]Glucagonoma, malignant                                   |
| BB5B511   | [M]Alpha-cell tumour, malignant                             |
| BB5B600   | [M]Mixed islet cell and exocrine adenocarcinoma             |
| BB5Bz00   | [M]Pancreatic adenoma or carcinoma NOS                      |
| BB5C.00   | [M]Gastrinoma and carcinomas                                |
| BB5C000   | [M]Gastrinoma NOS                                           |
| BB5C011   | [M]G cell tumour NOS                                        |
| BB5C100   | [M]Gastrinoma, malignant                                    |
| BB5C111   | [M]G cell tumour, malignant                                 |
| BB5Cz00   | [M]Gastrinoma or carcinoma NOS                              |
| BB5D.00   | [M]Hepatobiliary tract adenomas and carcinomas              |
| BB5D.11   | [M]Biliary tract adenomas and adenocarcinomas               |
| BB5D000   | [M]Bile duct adenoma                                        |
| BB5D011   | [M]Cholangioma                                              |
| BB5D100   | [M]Cholangiocarcinoma                                       |
| BB5D111   | [M]Bile duct carcinoma                                      |
| BB5D200   | [M]Bile duct cystadenoma                                    |
| BB5D300   | [M]Bile duct cystadenocarcinoma                             |
| BB5D400   | [M]Liver cell adenoma                                       |
| BB5D411   | [M]Hepatocellular adenoma                                   |
| BB5D412   | [M]Hepatoma, benign                                         |
| BB5D500   | [M]Hepatocellular carcinoma NOS                             |
| BB5D511   | [M]Hepatoma NOS                                             |
| BB5D512   | [M]Hepatoma, malignant                                      |
| BB5D513   | [M]Liver cell carcinoma                                     |
| BB5D600   | [M]Hepatocholangioma, benign                                |
| BB5D700   | [M]Combined hepatocellular carcinoma and cholangiocarcinoma |
| BB5D711   | [M]Hepatocholangiocarcinoma                                 |
| BB5D800   | [M]Hepatocellular carcinoma, fibrolamellar                  |
| BB5Dz00   | [M]Hepatobiliary adenoma or carcinoma NOS                   |
| BB5F.00   | [M]Trabecular adenocarcinoma                                |
| BB5J.00   | [M]Adenoid cystic carcinoma                                 |
| BB5J.11   | [M]Cylindroid adenocarcinoma                                |
| BB5K.00   | [M]Cribriform carcinoma                                     |
| BB5L.00   | [M]Adenomatous and adenocarcinomatous polyps                |
| BB5L100   | [M]Adenocarcinoma in adenomatous polyp                      |
| BB5L200   | [M]Adenocarcinoma in situ in adenomatous polyp              |
| BB5L300   | [M]Adenocarcinoma in multiple adenomatous polyps            |

| Read Code | Description                                                  |
|-----------|--------------------------------------------------------------|
| BB5Lz00   | [M]Adenomatous or adenocarcinomatous polyp NOS               |
| BB5M.00   | [M]Tubular adenomas and adenocarcinomas                      |
| BB5Mz00   | [M]Tubular adenoma or adenocarcinoma NOS                     |
| BB5N.00   | [M]Adenomatous and adenocarcinomatous polyps of colon        |
| BB5N.11   | [M]Adenoma or or adenocarcinoma in polyposis coli            |
| BB5N100   | [M]Adenocarcinoma in adenomatous polposis coli               |
| BB5Nz00   | [M]Adenomatous or adenocarcinomatous polyps of the colon NOS |
| BB5P.00   | [M]Solid carcinoma NOS                                       |
| BB5Q.00   | [M]Carcinoma simplex                                         |
| BB5S.00   | [M]Respiratory tract adenomas and adenocarcinomas            |
| BB5S200   | [M]Bronchiolo-alveolar adenocarcinoma                        |
| BB5S211   | [M]Alveolar cell carcinoma                                   |
| BB5S212   | [M]Bronchiolar carcinoma                                     |
| BB5S400   | [M]Alveolar adenocarcinoma                                   |
| BB5Sz00   | [M]Respiratory tract adenoma or adenocarcinoma NOS           |
| BB5T.00   | [M]Papillary adenomas and adenocarcinomas                    |
| BB5T100   | [M]Papillary adenocarcinoma NOS                              |
| BB5Tz00   | [M]Papillary adenoma or adenocarcinoma NOS                   |
| BB5U.00   | [M]Villous adenomas and adenocarcinomas                      |
| BB5U100   | [M]Adenocarcinoma in villous adenoma                         |
| BB5U200   | [M]Villous adenocarcinoma                                    |
| BB5Uz00   | [M]Villous adenoma or adenocarcinoma NOS                     |
| BB5V.00   | [M]Pituitary adenomas and carcinomas                         |
| BB5V100   | [M]Chromophobe carcinoma                                     |
| BB5V300   | [M]Acidophil carcinoma                                       |
| BB5V311   | [M]Eosinophil carcinoma                                      |
| BB5V500   | [M]Mixed acidophil-basophil carcinoma                        |
| BB5V700   | [M]Basophil carcinoma                                        |
| BB5V711   | [M]Mucoid cell carcinoma                                     |
| BB5Vz00   | [M]Pituitary adenoma or carcinoma NOS                        |
| BB5W.00   | [M]Oxyphilic adenomas and adenocarcinomas                    |
| BB5W100   | [M]Oxyphilic adenocarcinoma                                  |
| BB5W111   | [M]Hurthle cell adenocarcinoma                               |
| BB5W112   | [M]Oncytic adenocarcinoma                                    |
| BB5Wz00   | [M]Oxyphilic adenoma or adenocarcinoma NOS                   |
| BB5X.00   | [M]Clear cell adenomas and adenocarcinomas                   |
| BB5X100   | [M]Clear cell adenocarcinoma NOS                             |
| BB5Xz00   | [M]Clear cell adenoma or adenocarcinoma NOS                  |
| BB5Y.00   | [M]Hypernephroid tumour                                      |
| BB5Z.00   | [M]Clear cell adenofibroma                                   |
| BB5a.00   | [M]Renal adenoma and carcinoma                               |
| BB5a000   | [M]Renal cell carcinoma                                      |
| BB5a011   | [M]Grawitz tumour                                            |
| BB5a012   | [M]Hypernephroma                                             |



| Read Code | Description                                            |
|-----------|--------------------------------------------------------|
| BB5a100   | [M]Juxtaglomerular tumour                              |
| BB5a111   | [M]Reninoma                                            |
| BB5az00   | [M]Renal adenoma or carcinoma NOS                      |
| BB5b.00   | [M]Granular cell carcinoma                             |
| BB5c.00   | [M]Parathyroid adenomas and adenocarcinomas            |
| BB5c200   | [M]Water-clear cell adenocarcinoma                     |
| BB5cz00   | [M]Parathyroid adenoma or adenocarcinoma NOS           |
| BB5d.00   | [M]Mixed cell adenoma and adenocarcinoma               |
| BB5d100   | [M]Mixed cell adenocarcinoma                           |
| BB5dz00   | [M]Mixed cell adenoma or adenocarcinoma NOS            |
| BB5f.00   | [M]Thyroid adenoma and adenocarcinoma                  |
| BB5f100   | [M]Follicular adenocarcinoma NOS                       |
| BB5f111   | [M]Follicular carcinoma                                |
| BB5f200   | [M]Follicular adenocarcinoma, well differentiated type |
| BB5f300   | [M]Follicular adenocarcinoma, trabecular type          |
| BB5f600   | [M]Papillary and follicular adenocarcinoma             |
| BB5f700   | [M]Nonencapsulated sclerosing carcinoma                |
| BB5fz00   | [M]Thyroid adenoma or adenocarcinoma NOS               |
| BB5h100   | [M]Adrenal cortical carcinoma                          |
| BB5hz00   | [M]Adrenal cortical tumours NOS                        |
| BB5j.00   | [M]Endometrioid adenomas and carcinomas                |
| BB5j100   | [M]Endometrioid adenoma, borderline malignancy         |
| BB5j200   | [M]Endometrioid carcinoma                              |
| BB5j400   | [M]Endometrioid adenofibroma, borderline malignancy    |
| BB5j500   | [M]Endometrioid adenofibroma, malignant                |
| BB5jz00   | [M]Endometrioid adenoma or carcinoma NOS               |
| BB5y.00   | [M]Adenoma and adenocarcinomas OS                      |
| BB60.00   | [M]Skin appendage adenoma and carcinoma                |
| BB60100   | [M]Skin appendage carcinoma                            |
| BB60z00   | [M]Skin appendage adenoma or carcinoma NOS             |
| BB62.00   | [M]Apocrine adenoma and adenocarcinomas                |
| BB62100   | [M]Apocrine adenocarcinoma                             |
| BB69.00   | [M]Sebaceous adenoma and adenocarcinoma                |
| BB69100   | [M]Sebaceous adenocarcinoma                            |
| BB69z00   | [M]Sebaceous adenoma or adenocarcinoma NOS             |
| BB6A.00   | [M]Ceruminous adenoma and adenocarcinoma               |
| BB6A100   | [M]Ceruminous adenocarcinoma                           |
| BB6Az00   | [M]Ceruminous adenoma or adenocarcinoma NOS            |
| BB71.00   | [M]Mucoepidermoid carcinoma                            |
| BB80.00   | [M]Cystadenoma and carcinoma                           |
| BB80100   | [M]Cystadenocarcinoma NOS                              |
| BB80200   | [M]Borderline mucinous cystadenoma of the ovary        |
| BB80z00   | [M]Cystadenoma or carcinoma NOS                        |
| BB81.00   | [M]Ovarian cystic, mucinous and serous neoplasms       |
| BB81.11   | [M]Ovarian cystadenoma or carcinoma                    |

| <b>Read Code</b> | <b>Description</b>                                         |
|------------------|------------------------------------------------------------|
| BB81.12          | [M]Ovarian mucinous tumour                                 |
| BB81.13          | [M]Ovarian papillary tumour                                |
| BB81.14          | [M]Ovarian serous tumour                                   |
| BB81100          | [M]Serous cystadenoma, borderline malignancy               |
| BB81200          | [M]Serous cystadenocarcinoma, NOS                          |
| BB81400          | [M]Papillary cystadenoma, borderline malignancy            |
| BB81500          | [M]Papillary cystadenocarcinoma, NOS                       |
| BB81E00          | [M]Mucinous cystadenocarcinoma NOS                         |
| BB81E11          | [M]Pseudomucinous adenocarcinoma                           |
| BB85100          | [M]Metastatic signet ring cell carcinoma                   |
| BB9..00          | [M]Ductal, lobular and medullary neoplasms                 |
| BB90.00          | [M]Intraductal carcinoma, noninfiltrating NOS              |
| BB91.00          | [M]Infiltrating duct carcinoma                             |
| BB91.11          | [M]Duct carcinoma NOS                                      |
| BB91000          | [M]Intraductal papillary adenocarcinoma with invasion      |
| BB91100          | [M]Infiltrating duct and lobular carcinoma                 |
| BB92.00          | [M]Comedocarcinoma, noninfiltrating                        |
| BB93.00          | [M]Comedocarcinoma NOS                                     |
| BB94.00          | [M]Juvenile breast carcinoma                               |
| BB94.11          | [M]Secretory breast carcinoma                              |
| BB95.00          | [M]Intraductal papilloma                                   |
| BB95.11          | [M]Duct adenoma NOS                                        |
| BB95.12          | [M]Ductal papilloma                                        |
| BB96.00          | [M]Noninfiltrating intraductal papillary adenocarcinoma    |
| BB97.00          | [M]Intracystic papillary adenoma                           |
| BB98.00          | [M]Noninfiltrating intracystic carcinoma                   |
| BB99.00          | [M]Intraductal papillomatosis NOS                          |
| BB9A.00          | [M]Subareolar duct papillomatosis                          |
| BB9B.00          | [M]Medullary carcinoma NOS                                 |
| BB9B.11          | [M]C cell carcinoma                                        |
| BB9B.12          | [M]Parafollicular cell carcinoma                           |
| BB9C.00          | [M]Medullary carcinoma with amyloid stroma                 |
| BB9C.11          | [M]Solid carcinoma with amyloid stroma                     |
| BB9D.00          | [M]Medullary carcinoma with lymphoid stroma                |
| BB9E.00          | [M]Lobular carcinoma in situ                               |
| BB9E000          | [M]Intraductal carcinoma and lobular carcinoma in situ     |
| BB9F.00          | [M]Lobular carcinoma NOS                                   |
| BB9G.00          | [M]Infiltrating ductular carcinoma                         |
| BB9H.00          | [M]Inflammatory carcinoma                                  |
| BB9J.11          | [M]Paget's disease, breast                                 |
| BB9K.00          | [M]Paget's disease and infiltrating breast duct carcinoma  |
| BB9K000          | [M]Paget's disease and intraductal carcinoma of breast     |
| BB9L.00          | [M]Paget's disease, extramammary, exc Paget's disease bone |
| BB9M.00          | [M]Intracystic carcinoma NOS                               |
| BB9z.00          | [M]Ductal, lobular or medullary neoplasm NOS               |

| Read Code | Description                                                 |
|-----------|-------------------------------------------------------------|
| BBA..00   | [M]Acinar cell neoplasms                                    |
| BBA1.00   | [M]Acinar cell tumour                                       |
| BBA2.00   | [M]Acinar cell carcinoma                                    |
| BAz.00    | [M]Acinar cell neoplasm NOS                                 |
| BBB..00   | [M]Complex epithelial neoplasms                             |
| BBB0.00   | [M]Adenosquamous carcinoma                                  |
| BBB2.00   | [M]Adenocarcinoma with squamous metaplasia                  |
| BBB2.11   | [M]Adenoacanthoma                                           |
| BBB3.00   | [M]Adenocarcinoma with cartilaginous and osseous metaplasia |
| BBB4.00   | [M]Adenocarcinoma with spindle cell metaplasia              |
| BBB5.00   | [M]Adenocarcinoma with apocrine metaplasia                  |
| BBB6.00   | [M]Thymoma                                                  |
| BBB6100   | [M]Thymoma, malignant                                       |
| BBB6z00   | [M]Thymoma NOS                                              |
| BBB7.00   | [M]Epithelial-myoepithelial carcinoma                       |
| BBBz.00   | [M]Complex epithelial neoplasm NOS                          |
| BBC..00   | [M]Specialised gonadal neoplasms                            |
| BBC0.00   | [M]Sex cord-stromal tumour                                  |
| BBC0.11   | [M]Gonadal stromal tumour                                   |
| BBC0.12   | [M]Ovarian stromal tumour                                   |
| BBC0.13   | [M]Testicular stromal tumour                                |
| BBC0000   | [M]Sex cord tumour with annular tubules                     |
| BBC1.00   | [M]Thecal cell neoplasms                                    |
| BBC1000   | [M]Thecoma NOS                                              |
| BBC1100   | [M]Theca cell carcinoma                                     |
| BBC1200   | [M]Thecoma, luteinized                                      |
| BBC1z00   | [M]Thecal cell neoplasm NOS                                 |
| BBC2.00   | [M]Luteoma NOS                                              |
| BBC2.11   | [M]Luteinoma                                                |
| BBC3.00   | [M]Granulosa cell tumour NOS                                |
| BBC3000   | [M]Juvenile granulosa cell tumour                           |
| BBC4.00   | [M]Granulosa cell tumour, malignant                         |
| BBC5.00   | [M]Granulosa cell-theca cell tumour                         |
| BBC6.00   | [M]Androblastoma                                            |
| BBC6000   | [M]Androblastoma, benign                                    |
| BBC6100   | [M]Androblastoma, malignant                                 |
| BBC6111   | [M]Arrhenoblastoma, malignant                               |
| BBC6z00   | [M]Androblastoma NOS                                        |
| BBC6z11   | [M]Arrhenoblastoma NOS                                      |
| BBC7.00   | [M]Sertoli-Leydig cell tumour                               |
| BBC8.00   | [M]Gynandroblastoma                                         |
| BBC9.00   | [M]Tubular androblastoma NOS                                |
| BBC9.13   | [M]Sertoli cell tumour                                      |
| BBCA.00   | [M]Sertoli cell carcinoma                                   |

| Read Code | Description                                 |
|-----------|---------------------------------------------|
| BBCB.00   | [M]Tubular androblastoma with lipid storage |
| BBCB.11   | [M]Sertoli cell tumour with lipid storage   |
| BBCC.00   | [M]Leydig cell tumour                       |
| BBCC100   | [M]Leydig cell tumour, malignant            |
| BBCC111   | [M]Interstitial cell tumour, malignant      |
| BBCCz00   | [M]Leydig cell tumour NOS                   |
| BBCCz11   | [M]Interstitial cell tumour NOS             |
| BBCD.00   | [M]Hilar cell tumour                        |
| BBCE.00   | [M]Lipid cell tumour of ovary               |
| BBCE.11   | [M]Masculinovblastoma                       |
| BBCF.00   | [M]Adrenal rest tumour                      |
| BBCG.00   | [M]Sclerosing stromal tumour                |
| BBCz.00   | [M]Specialised gonadal neoplasm NOS         |
| BBD.00    | [M]Paragangliomas and glomus tumours        |
| BBD0.00   | [M]Paraganglioma NOS                        |
| BBD1.00   | [M]Paraganglioma, malignant                 |
| BBD2.00   | [M]Sympathetic paraganglioma                |
| BBD3.00   | [M]Parasympathetic paraganglioma            |
| BBD4.00   | [M]Glomus jugulare tumour                   |
| BBD4.11   | [M]Jugular paraganglioma                    |
| BBD5.00   | [M]Aortic body tumour                       |
| BBD6.00   | [M]Carotid body tumour                      |
| BBD7.00   | [M]Extra-adrenal paraganglioma, NOS         |
| BBD7.11   | [M]Chemodectoma                             |
| BBD8.00   | [M]Extra-adrenal paraganglioma, malignant   |
| BBD9.00   | [M]Pheochromocytoma NOS                     |
| BBD9.11   | [M]Chromaffin paraganglioma                 |
| BBD9.12   | [M]Chromaffin tumour                        |
| BBD9.13   | [M]Chromaffinoma                            |
| BBDA.00   | [M]Pheochromocytoma, malignant              |
| BBDA.11   | [M]Pheochromoblastoma                       |
| BBDB.00   | [M]Glomangiosarcoma                         |
| BBDB.11   | [M]Glomoid sarcoma                          |
| BBDC.00   | [M]Glomus tumour                            |
| BBDD.00   | [M]Glomangioma                              |
| BBDE.00   | [M]Gangliocytic paraganglioma               |
| BBDF.00   | [M]Glomangiomyoma                           |
| BB Dz.00  | [M]Paraganglioma or glomus tumour NOS       |
| BBE.00    | [M]Naevi and melanomas                      |
| BBE1.00   | [M]Malignant melanoma NOS                   |
| BBE1.11   | [M]Melanocarcinoma                          |
| BBE1.12   | [M]Melanoma NOS                             |
| BBE1.13   | [M]Melanosarcoma NOS                        |
| BBE1.14   | [M]Naevocarcinoma                           |
| BBE1000   | [M]Malignant melanoma, regressing           |

| Read Code | Description                                             |
|-----------|---------------------------------------------------------|
| BBE100    | [M]Desmoplastic melanoma, malignant                     |
| BBE2.00   | [M]Nodular melanoma                                     |
| BBE3.00   | [M]Balloon cell naevus                                  |
| BBE4.00   | [M]Balloon cell melanoma                                |
| BBE5.00   | [M]Halo naevus                                          |
| BBE8.11   | [M]Melanocytoma of eyeball                              |
| BBEA.00   | [M]Amelanotic melanoma                                  |
| BBEC.00   | [M]Malignant melanoma in junctional naevus              |
| BBED.00   | [M]Precancerous melanosis NOS                           |
| BBEE.00   | [M]Malignant melanoma in precancerous melanosis         |
| BBEF.00   | [M]Hutchinson's melanotic freckle                       |
| BBEF.11   | [M]Lentigo maligna                                      |
| BBEG.00   | [M]Malignant melanoma in Hutchinson's melanotic freckle |
| BBEG.11   | [M]Lentigo maligna melanoma                             |
| BBEG000   | [M]Acral lentiginous melanoma, malignant                |
| BBEH.00   | [M]Superficial spreading melanoma                       |
| BBEM.00   | [M]Malignant melanoma in giant pigmented naevus         |
| BBEN.11   | [M]Juvenila melanoma                                    |
| BBEP.00   | [M]Epithelioid cell melanoma                            |
| BBEQ.00   | [M]Spindle cell melanoma NOS                            |
| BBER.00   | [M]Spindle cell melanoma, type A                        |
| BBES.00   | [M]Spindle cell melanoma, type B                        |
| BBET.00   | [M]Mixed epithelioid and spindle melanoma               |
| BBEX.00   | [M]Melanoma in situ                                     |
| BBEz.00   | [M]Naevi or melanoma NOS                                |
| BBF.00    | [M]Soft tissue tumours and sarcomas NOS                 |
| BBF1.00   | [M]Sarcoma NOS                                          |
| BBF2.00   | [M]Sarcomatosis NOS                                     |
| BBF3.00   | [M]Spindle cell sarcoma                                 |
| BBF4.00   | [M]Giant cell sarcoma (except of bone)                  |
| BBF4.11   | [M]Pleomorphic cell sarcoma                             |
| BBF5.00   | [M]Small cell sarcoma                                   |
| BBF5.11   | [M]Round cell sarcoma                                   |
| BBF6.00   | [M]Epithelioid cell sarcoma                             |
| BBFz.00   | [M]Soft tissue tumour or sarcoma NOS                    |
| BBG1.00   | [M]Fibrosarcoma NOS                                     |
| BBG3.00   | [M]Fibromyxosarcoma                                     |
| BBG5.00   | [M]Periosteal fibrosarcoma                              |
| BBG7.00   | [M]Fascial fibrosarcoma                                 |
| BBG8.00   | [M]Infantile fibrosarcoma                               |
| BBG8.11   | [M]Congenital fibrosarcoma                              |
| BBGJ.00   | [M]Fibroanthoma, malignant                              |
| BBGJ.11   | [M]Fibroanthosarcoma                                    |
| BBGM.00   | [M]Dermatofibrosarcoma NOS                              |
| BBH1.00   | [M]Myxosarcoma                                          |

| Read Code | Description                              |
|-----------|------------------------------------------|
| BBJ1.00   | [M]Liposarcoma NOS                       |
| BBJ1.11   | [M]Fibroliposarcoma                      |
| BBJ3.00   | [M]Liposarcoma, well differentiated type |
| BBJ5.11   | [M]Embryonal liposarcoma                 |
| BBJ5.12   | [M]Myxoliposarcoma                       |
| BBJ6.00   | [M]Round cell liposarcoma                |
| BBJ7.00   | [M]Pleomorphic liposarcoma               |
| BBJ8.00   | [M]Mixed type liposarcoma                |
| BBJB100   | [M]Angiomyoliposarcoma                   |
| BBJH.00   | [M]Dedifferentiated liposarcoma          |
| BBJz.00   | [M]Lipomatous neoplasms NOS              |
| BBK0200   | [M]Leiomyosarcoma NOS                    |
| BBK0400   | [M]Epithelioid leiomyosarcoma            |
| BBK1100   | [M]Angiomyosarcoma                       |
| BBK2100   | [M]Myosarcoma                            |
| BBK2z00   | [M]Myoma or myosarcoma NOS               |
| BBK3.00   | [M]Rhabdomyomatous neoplasms             |
| BBK3100   | [M]Rhabdomyosarcoma NOS                  |
| BBK3200   | [M]Pleomorphic rhabdomyosarcoma          |
| BBK3300   | [M]Mixed cell rhabdomyosarcoma           |
| BBK3600   | [M]Embryonal rhabdomyosarcoma            |
| BBK3611   | [M]Sarcoma botryoides                    |
| BBK3700   | [M]Alveolar rhabdomyosarcoma             |
| BBL0.00   | [M]Endometrial stromal sarcoma           |
| BBL4.00   | [M]Mixed tumour, malignant, NOS          |
| BBL7.00   | [M]Mixed and stromal renal neoplasms     |
| BBL7000   | [M]Mesoblastic nephroma                  |
| BBL8.00   | [M]Hepatoblastoma                        |
| BBLC.00   | [M]Mesenchymomas                         |
| BBLC100   | [M]Mesenchymoma, malignant               |
| BBLCz00   | [M]Mesenchymoma NOS                      |
| BBLD.00   | [M]Embryonal sarcoma                     |
| BBLE.00   | [M]Adenosarcoma                          |
| BBLF.00   | [M]Endometrial stromal nodule            |
| BBLG.00   | [M]Carcinoma in pleomorphic adenoma      |
| BBLH.00   | [M]Rhabdoid sarcoma                      |
| BBLJ.00   | [M]Clear cell sarcoma of kidney          |
| BBLK.00   | [M]Pancreatoblastoma                     |
| BBLM.00   | [M]Pulmonary blastoma                    |
| BBLz.00   | [M]Complex mixed or stromal neoplasm NOS |
| BBM..00   | [M]Fibroepithelial neoplasms             |
| BBM0.00   | [M]Brenner tumours                       |
| BBM0000   | [M]Brenner tumour, borderline malignancy |
| BBM0100   | [M]Brenner tumour, malignant             |
| BBM0z00   | [M]Brenner tumour NOS                    |

| Read Code | Description                                      |
|-----------|--------------------------------------------------|
| BBM8.00   | [M]Cystosarcoma phyllodes NOS                    |
| BBM9.00   | [M]Cystosarcoma phyllodes, malignant             |
| BBN1.00   | [M]Synovial sarcoma NOS                          |
| BBN2.00   | [M]Synovial sarcoma, spindle cell type           |
| BBN3.00   | [M]Synovial sarcoma, epithelioid cell type       |
| BBN4.00   | [M]Synovial sarcoma, biphasic type               |
| BBN5.00   | [M]Clear cell sarcoma of tendons and aponeuroses |
| BBNz.00   | [M]Synovial neoplasm NOS                         |
| BBP.00    | [M]Mesothelial neoplasms                         |
| BBP1.00   | [M]Mesothelioma, malignant                       |
| BBP3.00   | [M]Fibrous mesothelioma, malignant               |
| BBP5.00   | [M]Epithelioid mesothelioma, malignant           |
| BBP7.00   | [M]Mesothelioma, biphasic type, malignant        |
| BBP8.00   | [M]Adenomatoid tumour NOS                        |
| BBP9.00   | [M]Cystic mesothelioma                           |
| BBPX.00   | [M]Mesothelioma, unspecified                     |
| BBPz.00   | [M]Mesothelial neoplasm NOS                      |
| BBQ.00    | [M]Germ cell neoplasms                           |
| BBQ0.00   | [M]Dysgerminoma                                  |
| BBQ1.00   | [M]Seminomas                                     |
| BBQ1000   | [M]Seminoma, anaplastic type                     |
| BBQ1100   | [M]Spermatocytic seminoma                        |
| BBQ1z00   | [M]Seminoma NOS                                  |
| BBQ2.00   | [M]Germinoma                                     |
| BBQ3.00   | [M]Embryonal carcinoma NOS                       |
| BBQ4.00   | [M]Endodermal sinus tumour                       |
| BBQ4.11   | [M]Infantile embryonal carcinoma                 |
| BBQ4.12   | [M]Orchioblastoma                                |
| BBQ4.13   | [M]Polyvesicular vitelline tumour                |
| BBQ4.14   | [M]Yolk sac tumour                               |
| BBQ5.00   | [M]Polyembryoma                                  |
| BBQ5.11   | [M]Polyembryonal embryonal carcinoma             |
| BBQ6.00   | [M]Gonadoblastoma                                |
| BBQ7200   | [M]Teratoma, malignant, NOS                      |
| BBQ7211   | [M]Embryonal teratoma                            |
| BBQ7212   | [M]Immature teratoma                             |
| BBQ7213   | [M]Teratoblastoma, malignant                     |
| BBQ7300   | [M]Teratocarcinoma                               |
| BBQ7400   | [M]Malignant teratoma, undifferentiated type     |
| BBQ7500   | [M]Malignant teratoma, intermediate type         |
| BBQ7z00   | [M]Teratoma NOS                                  |
| BBQ9.00   | [M]Dermoid cyst with malignant transformation    |
| BBQA.00   | [M]Strumal neoplasms                             |
| BBQA000   | [M]Struma ovarii NOS                             |
| BBQA100   | [M]Struma ovarii, malignant                      |

| Read Code | Description                                     |
|-----------|-------------------------------------------------|
| BBQA200   | [M]Strumal carcinoid                            |
| BBQAz00   | [M]Strumal neoplasm NOS                         |
| BBQB.00   | [M]Mixed germ cell tumour                       |
| BBQz.00   | [M]Germ cell neoplasm NOS                       |
| BBR1.00   | [M]Invasive hydatidiform mole                   |
| BBR1.11   | [M]Chorioadenoma                                |
| BBR1.12   | [M]Chorioadenoma destruens                      |
| BBR1.13   | [M]Invasive mole NOS                            |
| BBR2.00   | [M]Choriocarcinoma                              |
| BBR2.11   | [M]Chorioepithelioma                            |
| BBR3.00   | [M]Choriocarcinoma combined with teratoma       |
| BBR4.00   | [M]Malignant teratoma, trophoblastic            |
| BBR6.00   | [M]Placental site trophoblastic tumour          |
| BBR7.00   | [M]Classical hydatidiform mole                  |
| BBR8.00   | [M]Complete hydatidiform mole                   |
| BBRz.00   | [M]Trophoblastic neoplasm NOS                   |
| BBS..00   | [M]Mesonephromas                                |
| BBS1.00   | [M]Mesonephric tumour                           |
| BBS2.00   | [M]Mesonephroma, malignant                      |
| BBS2.11   | [M]Wolffian duct carcinoma                      |
| BBS3.00   | [M]Endosalpingioma                              |
| BBSz.00   | [M]Mesonephroma NOS                             |
| BBT0.12   | [M]Chorioangioma                                |
| BBT1.00   | [M]Haemangiosarcoma                             |
| BBT1.11   | [M]Angiosarcoma                                 |
| BBT2.00   | [M]Cavernous haemangioma                        |
| BBT5.00   | [M]Kupffer cell sarcoma                         |
| BBT7.00   | [M]Haemangioendothelioma                        |
| BBT7100   | [M]Haemangioendothelioma, malignant             |
| BBT7z00   | [M]Haemangioendothelioma NOS                    |
| BBT7z11   | [M]Angioendothelioma                            |
| BBTA.00   | [M]Kaposi's sarcoma                             |
| BBTA.11   | [M]Multiple haemorrhagic sarcoma                |
| BBTD100   | [M]Haemangiopericytoma NOS                      |
| BBTD200   | [M]Haemangiopericytoma, malignant               |
| BBTDz00   | [M]Haemangiopericytic neoplasm NOS              |
| BBTF.00   | [M]Haemangioblastoma                            |
| BBTF.11   | [M]Angioblastoma                                |
| BBTG.00   | [M]Epithelioid haemangioma                      |
| BBTH.00   | [M]Histiocytoid haemangioma                     |
| BBTJ.00   | [M]Epithelioid haemangioendothelioma NOS        |
| BBTK.00   | [M]Epithelioid haemangioendothelioma, malignant |
| BBTL.00   | [M]Intravascular bronchial alveolar tumour      |
| BBTz.00   | [M]Blood vessel tumour NOS                      |
| BBU..00   | [M]Lymphatic vessel tumours                     |



| Read Code | Description                                |
|-----------|--------------------------------------------|
| BBU..11   | [M]Lymphangiomas tumours                   |
| BBU0.00   | [M]Lymphangioma NOS                        |
| BBU1.00   | [M]Lymphangiosarcoma                       |
| BBU2.00   | [M]Capillary lymphangioma                  |
| BBU3.00   | [M]Cavernous lymphangioma                  |
| BBU4.00   | [M]Cystic lymphangioma                     |
| BBU5.00   | [M]Lymphangiomyoma                         |
| BBU6.00   | [M]Lymphangiomyomatosis                    |
| BBU7.00   | [M]Haemolympangioma                        |
| BBUz.00   | [M]Lymphatic vessel tumour NOS             |
| BBV..00   | [M]Osteomas and osteosarcomas              |
| BBV..11   | [M]Juxtacortical osteogenic sarcoma        |
| BBV..12   | [M]Parosteal osteosarcoma                  |
| BBV..13   | [M]Periosteal osteogenic sarcoma           |
| BBV0.00   | [M]Osteoma NOS                             |
| BBV1.00   | [M]Osteosarcoma NOS                        |
| BBV1.11   | [M]Osteoblastic sarcoma                    |
| BBV1.12   | [M]Osteochondrosarcoma                     |
| BBV1.13   | [M]Osteogenic sarcoma NOS                  |
| BBV2.00   | [M]Chondroblastic osteosarcoma             |
| BBV3.00   | [M]Fibroblastic osteosarcoma               |
| BBV3.11   | [M]Osteofibrosarcoma                       |
| BBV4.00   | [M]Telangiectatic osteosarcoma             |
| BBV5.00   | [M]Osteosarcoma in Paget's disease of bone |
| BBV6.00   | [M]Juxtacortical osteosarcoma              |
| BBV7.00   | [M]Osteoid osteoma NOS                     |
| BBV8.00   | [M]Osteoblastoma                           |
| BBV8.11   | [M]Giant osteoid osteoma                   |
| BBV9.00   | [M]Myxoid chondrosarcoma                   |
| BBVA.00   | [M] Small cell osteosarcoma                |
| BBVz.00   | [M]Osteoma or osteosarcoma NOS             |
| BBW4.00   | [M]Chondrosarcoma NOS                      |
| BBW4.11   | [M]Fibrochondrosarcoma                     |
| BBW6.00   | [M]Juxtacortical chondrosarcoma            |
| BBW7.00   | [M]Chondroblastoma NOS                     |
| BBW7.11   | [M]Chondromatous giant cell tumour         |
| BBW7.12   | [M]Codman's tumour                         |
| BBW8.00   | [M]Chondroblastoma, malignant              |
| BBW9.00   | [M]Mesenchymal chondrosarcoma              |
| BBWA.00   | [M]Chondromyxoid fibroma                   |
| BBWz.00   | [M]Chondromatous neoplasm NOS              |
| BBX..00   | [M]Giant cell tumours                      |
| BBX0.00   | [M]Giant cell tumour of bone NOS           |
| BBX0.11   | [M]Osteoclastoma                           |
| BBX1.00   | [M]Giant cell tumour of bone, malignant    |

| Read Code | Description                                  |
|-----------|----------------------------------------------|
| BBX1.11   | [M]Giant cell bone sarcoma                   |
| BBX1.12   | [M]Osteoclastoma, malignant                  |
| BBX2.00   | [M]Giant cell tumour of soft parts NOS       |
| BBX3.00   | [M]Malignant giant cell tumour of soft parts |
| BBXz.00   | [M]Giant cell tumour NOS                     |
| BBY..00   | [M]Miscellaneous bone tumours                |
| BBY0.00   | [M]Ewing's sarcoma                           |
| BBY0.11   | [M]Endothelial bone sarcoma                  |
| BBY1.00   | [M]Adamantinoma of long bones                |
| BBY1.11   | [M]Tibial adamantinoma                       |
| BBZ2.00   | [M]Odontogenic tumour, malignant             |
| BBZ2.11   | [M]Intraosseous carcinoma                    |
| BBZC.00   | [M]Ameloblastic odontosarcoma                |
| BBZD.11   | [M]Adenoameloblastoma                        |
| BBZG.00   | [M]Ameloblastoma, malignant                  |
| BBZG.11   | [M]Adamantinoma, malignant                   |
| BBZN.00   | [M]Ameloblastic fibrosarcoma                 |
| BBZN.11   | [M]Odontogenic fibrosarcoma                  |
| BBa0.00   | [M]Craniopharyngioma                         |
| BBa0.11   | [M]Rathke's pouch tumour                     |
| BBa1.00   | [M]Pinealoma                                 |
| BBa2.00   | [M]Pineocytoma                               |
| BBa3.00   | [M]Pineoblastoma                             |
| BBa4.00   | [M]Melanotic neuroectodermal tumour          |
| BBa4.11   | [M]Melanoameloblastoma                       |
| BBa4.12   | [M]Melanotic progonoma                       |
| BBa4.13   | [M]Retinal angle tumour                      |
| BBa5.00   | [M]Chordoma                                  |
| BBaz.00   | [M]Miscellaneous tumour NOS                  |
| BBb..00   | [M]Gliomas                                   |
| BBb0.00   | [M]Glioma, malignant                         |
| BBb0.11   | [M]Glioma NOS                                |
| BBb0.12   | [M]Gliosarcoma                               |
| BBb1.00   | [M]Gliomatosis cerebri                       |
| BBb2.00   | [M]Mixed glioma                              |
| BBb2.11   | [M]Mixed glioma                              |
| BBb3.00   | [M]Subependymal glioma                       |
| BBb3.11   | [M]Subependymal astrocytoma NOS              |
| BBb3.12   | [M]Subependymal astrocytoma NOS              |
| BBb3.13   | [M]Subependymoma                             |
| BBb4.00   | [M]Subependymal giant cell astrocytoma       |
| BBb5.00   | [M]Choroid plexus papilloma NOS              |
| BBb6.00   | [M]Choroid plexus papilloma, malignant       |
| BBb7.00   | [M]Ependymoma NOS                            |
| BBb8.00   | [M]Ependymoma, anaplastic type               |

| <b>Read Code</b> | <b>Description</b>                         |
|------------------|--------------------------------------------|
| BBb8.11          | [M]Ependymoblastoma                        |
| BBb9.00          | [M]Papillary ependymoma                    |
| BBbA.00          | [M]Myxopapillary ependymoma                |
| BBbB.00          | [M]Astrocytoma NOS                         |
| BBbB.11          | [M]Astrocytic glioma                       |
| BBbB.12          | [M]Astroganglioma                          |
| BBbC.00          | [M]Astrocytoma, anaplastic type            |
| BBbD.00          | [M]Protoplasmic astrocytoma                |
| BBbE.00          | [M]Gemistocytic astrocytoma                |
| BBbE.11          | [M]Gemistocytoma                           |
| BBbF.00          | [M]Fibrillary astrocytoma                  |
| BBbG.00          | [M]Pilocytic astrocytoma                   |
| BBbG.11          | [M]Juvenile astrocytoma                    |
| BBbG.12          | [M]Piloid astrocytoma                      |
| BBbH.00          | [M]Spongioblastoma NOS                     |
| BBbJ.00          | [M]Spongioblastoma polare                  |
| BBbK.00          | [M]Astroblastoma                           |
| BBbL.00          | [M]Glioblastoma NOS                        |
| BBbL.11          | [M]Glioblastoma multiforme                 |
| BBbL.12          | [M]Spongioblastoma multiforme              |
| BBbM.00          | [M]Giant cell glioblastoma                 |
| BBbN.00          | [M]Glioblastoma with sarcomatous component |
| BBbP.00          | [M]Primitive polar spongioblastoma         |
| BBbQ.00          | [M]Oligodendroglioma NOS                   |
| BBbR.00          | [M]Oligodendroglioma, anaplastic type      |
| BBbS.00          | [M]Oligodendroblastoma                     |
| BBbT.00          | [M]Medulloblastoma NOS                     |
| BBbU.00          | [M]Desmoplastic medulloblastoma            |
| BBbV.00          | [M]Medullomyoblastoma                      |
| BBbW.00          | [M]Cerebellar sarcoma NOS                  |
| BBbX.00          | [M]Monstrocellular sarcoma                 |
| BBbZ.00          | [M]Pleomorphic xanthoastrocytoma           |
| BBba.00          | [M]Primitive neuroectodermal tumour        |
| BBba000          | [M]Peripheral neuroectodermal tumour       |
| BBbz.00          | [M]Glioma NOS                              |
| BBc..00          | [M]Neuroepitheliomatous neoplasms          |
| BBc0.00          | [M]Ganglioneuromatous neoplasms            |
| BBc0000          | [M]Ganglioneuroma                          |
| BBc0011          | [M]Gangliocytoma                           |
| BBc0100          | [M]Ganglioneuroblastoma                    |
| BBc0200          | [M]Ganglioneuromatosis                     |
| BBc0z00          | [M]Ganglioneuromatous neoplasm NOS         |
| BBc1.00          | [M]Neuroblastoma NOS                       |
| BBc1.11          | [M]Sympathicoblastoma                      |
| BBc1.12          | [M]Sympathicogonioma                       |

| Read Code | Description                              |
|-----------|------------------------------------------|
| BBc1.13   | [M]Sympathogonioma                       |
| BBc2.00   | [M]Medulloepithelioma NOS                |
| BBc2.11   | [M]Diktyoma                              |
| BBc3.00   | [M]Teratoid medulloepithelioma           |
| BBc4.00   | [M]Neuroepithelioma NOS                  |
| BBc5.00   | [M]Spongioneuroblastoma                  |
| BBc6.00   | [M]Ganglioglioma                         |
| BBc6.11   | [M]Glioneuroma                           |
| BBc7.00   | [M]Neurocytoma                           |
| BBc7.11   | [M]Neuroastrocytoma                      |
| BBc8.00   | [M]Pacinian tumour                       |
| BBc9.00   | [M]Retinoblastomas                       |
| BBc9000   | [M]Retinoblastoma, differentiated type   |
| BBc9100   | [M]Retinoblastoma, undifferentiated type |
| BBc9z00   | [M]Retinoblastoma NOS                    |
| BBcA.00   | [M]Olfactory neurogenic tumour           |
| BBcB.00   | [M]Aesthesioneurocytoma                  |
| BBcC.00   | [M]Aesthesioneuroblastoma                |
| BBcC.11   | [M]Olfactory neuroblastoma               |
| BBcD.00   | [M]Aesthesioneuroepithelioma             |
| BBcD.11   | [M]Olfactory neuroepithelioma            |
| BBcz.00   | [M]Neuroepitheliomatous neoplasm NOS     |
| BBd..00   | [M]Meningiomas                           |
| BBd0.00   | [M]Meningioma NOS                        |
| BBd1.00   | [M]Meningiomatosis NOS                   |
| BBd1.11   | [M]Diffuse meningiomatosis               |
| BBd1.12   | [M]Multiple meningiomatosis              |
| BBd2.00   | [M]Meningioma, malignant                 |
| BBd2.11   | [M]Leptomeningeal sarcoma                |
| BBd2.12   | [M]Meningothelial sarcoma                |
| BBd3.00   | [M]Meningotheliomatous meningioma        |
| BBd3.11   | [M]Endotheliomatous meningioma           |
| BBd3.12   | [M]Syncytial meningioma                  |
| BBd4.00   | [M]Fibrous meningioma                    |
| BBd5.00   | [M]Psammomatous meningioma               |
| BBd6.00   | [M]Angiomatous meningioma                |
| BBd7.00   | [M]Haemangioblastic meningioma           |
| BBd7.11   | [M]Angioblastic meningioma               |
| BBd8.00   | [M]Haemangiopericytic meningioma         |
| BBd9.00   | [M]Transitional meningioma               |
| BBd9.11   | [M]Mixed meningioma                      |
| BBdA.00   | [M]Papillary meningioma                  |
| BBdB.00   | [M]Meningeal sarcomatosis                |
| BBdz.00   | [M]Meningioma NOS                        |
| BBe..00   | [M]Nerve sheath tumour                   |

| Read Code | Description                                                 |
|-----------|-------------------------------------------------------------|
| BBe..11   | [M]Neurofibromas                                            |
| BBe0.00   | [M]Neurofibroma NOS                                         |
| BBe1.00   | [M]Neurofibromatosis NOS                                    |
| BBe1.11   | [M]Multiple neurofibromatosis                               |
| BBe1.12   | [M]Von Recklinghausen's disease                             |
| BBe2.00   | [M]Neurofibrosarcoma                                        |
| BBe3.00   | [M]Melanotic neurofibroma                                   |
| BBe4.00   | [M]Plexiform neurofibroma                                   |
| BBe5.00   | [M]Neurilemmoma NOS                                         |
| BBe5.11   | [M]Acoustic neuroma                                         |
| BBe5.12   | [M]Neurinoma                                                |
| BBe5.13   | [M]Schwannoma NOS                                           |
| BBe6.00   | [M]Neurinomatosis                                           |
| BBe7.00   | [M]Neurilemmoma, malignant                                  |
| BBe7.11   | [M]Schwannoma, malignant                                    |
| BBe8.00   | [M]Neuroma NOS                                              |
| BBe9.00   | [M]Triton tumour, malignant                                 |
| BBeA.00   | [M]Neurothekeoma                                            |
| BBez.00   | [M]Nerve sheath tumour NOS                                  |
| BBf..00   | [M]Granular cell tumours and alveolar soft part sarcoma     |
| BBf0.00   | [M]Granular cell tumour NOS                                 |
| BBf1.00   | [M]Granular cell tumour, malignant                          |
| BBf2.00   | [M]Alveolar soft part sarcoma                               |
| BBfz.00   | [M]Granular cell tumour or alveolar soft part sarcoma NOS   |
| BBg..00   | [M]Lymphomas, NOS or diffuse                                |
| BBg0.00   | [M]Lymphomatous tumour, benign                              |
| BBg1.00   | [M]Malignant lymphoma NOS                                   |
| BBg1.11   | [M]Lymphoma NOS                                             |
| BBg1000   | [M]Malignant lymphoma, diffuse NOS                          |
| BBg2.00   | [M]Malignant lymphoma, non Hodgkin's type                   |
| BBg2.11   | [M]Non Hodgkins lymphoma                                    |
| BBg3.00   | [M]Malignant lymphoma, undifferentiated cell type NOS       |
| BBg4.00   | [M]Malignant lymphoma, stem cell type                       |
| BBg5.00   | [M]Malignant lymphoma, convoluted cell type NOS             |
| BBg6.00   | [M]Lymphosarcoma NOS                                        |
| BBg7.00   | [M]Malignant lymphoma, lymphoplasmacytoid type              |
| BBg8.00   | [M]Malignant lymphoma, immunoblastic type                   |
| BBg9.00   | [M]Malignant lymphoma, mixed lymphocytic-histiocytic NOS    |
| BBg9.11   | [M]Reticulolymphosarcoma NOS                                |
| BBg9.12   | [M]Reticulolymphosarcoma, diffuse                           |
| BBgA.00   | [M]Malignant lymphoma, centroblastic-centrocytic, diffuse   |
| BBgA.11   | [M]Germinoblastoma, diffuse                                 |
| BBgB.00   | [M]Malignant lymphoma, follicular centre cell NOS           |
| BBgC.00   | [M]Malignant lymphoma, lymphocytic, well differentiated NOS |

| Read Code | Description                                                  |
|-----------|--------------------------------------------------------------|
| BBgC.11   | [M]Lymphocytic lymphoma NOS                                  |
| BBgC.12   | [M]Lymphocytic lymphosarcoma NOS                             |
| BBgD.00   | [M]Malig lymphoma, lymphocytic, intermediate different NOS   |
| BBgE.00   | [M]Malignant lymphoma, centrocytic                           |
| BBgF.00   | [M]Malignant lymphoma, follicular centre cell, cleaved NOS   |
| BBgG.00   | [M]Malignant lymphoma, lymphocytic, poorly different NOS     |
| BBgG.11   | [M]Lymphoblastic lymphosarcoma NOS                           |
| BBgG.12   | [M]Lymphoblastic lymphoma NOS                                |
| BBgG.13   | [M]Lymphoblastoma NOS                                        |
| BBgH.00   | [M]Prolymphocytic lymphosarcoma                              |
| BBgJ.00   | [M]Malignant lymphoma, centroblastic type NOS                |
| BBgJ.11   | [M]Germinoblastic sarcoma NOS                                |
| BBgK.00   | [M]Malig lymphoma, follicular centre cell, non-cleaved NOS   |
| BBgL.00   | [M]Malignant lymphoma, small lymphocytic NOS                 |
| BBgM.00   | [M]Malignant lymphoma, small cleaved cell, diffuse           |
| BBgN.00   | [M]Malig lymphoma,lymphocytic,intermediate differrn, diffuse |
| BBgP.00   | [M]Malignant lymphoma, mixed small and large cell, diffuse   |
| BBgQ.00   | [M]Malignant lymphomatous polyposis                          |
| BBgR.00   | [M]Malignant lymphoma, large cell, diffuse NOS               |
| BBgS.00   | [M]Malignant lymphoma, large cell, cleaved, diffuse          |
| BBgT.00   | [M]Malignant lymphoma, large cell, noncleaved, diffuse       |
| BBgV.00   | [M]Malignant lymphoma, small cell, noncleaved, diffuse       |
| BBgz.00   | [M]Lymphoma, diffuse or NOS                                  |
| BBh..00   | [M]Reticulosarcomas                                          |
| BBh0.00   | [M]Reticulosarcoma NOS                                       |
| BBh0.11   | [M]Reticulum cell sarcoma NOS                                |
| BBh1.00   | [M]Reticulosarcoma, pleomorphic cell type                    |
| BBh2.00   | [M]Reticulosarcoma, nodular                                  |
| BBhz.00   | [M]Reticulosarcoma NOS                                       |
| BBj..00   | [M]Hodgkin's disease                                         |
| BBj0.00   | [M]Hodgkin's disease NOS                                     |
| BBj0.11   | [M]Lymphogranuloma, malignant                                |
| BBj1.00   | [M]Hodgkin's disease, lymphocytic predominance               |
| BBj1000   | [M]Hodgkin,s disease, lymphocytic predominance, diffuse      |
| BBj1100   | [M]Hodgkin,s disease, lymphocytic predominance, nodular      |
| BBj2.00   | [M]Hodgkin's disease, mixed cellularity                      |
| BBj3.00   | [M]Hodgkin's disease, lymphocytic depletion NOS              |
| BBj4.00   | [M]Hodgkin's disease,lymphocytic depletion,diffuse fibrosis  |
| BBj5.00   | [M]Hodgkin's disease, lymphocytic depletion, reticular type  |
| BBj6.00   | [M]Hodgkin's disease, nodular sclerosis NOS                  |

| Read Code | Description                                                  |
|-----------|--------------------------------------------------------------|
| BBj6000   | [M]Hodgkin,s disease, nodular sclerosis, lymphocytic predom  |
| BBj6100   | [M]Hodgkin,s disease, nodular sclerosis, mixed cellularity   |
| BBj6200   | [M]Hodgkin,s disease, nodular sclerosis, lymphocytic deplet  |
| BBj7.00   | [M]Hodgkin's disease, nodular sclerosis, cellular phase      |
| BBj8.00   | [M]Hodgkin's paraganuloma                                    |
| BBj9.00   | [M]Hodgkin's granuloma                                       |
| BBjA.00   | [M]Hodgkin's sarcoma                                         |
| BBjz.00   | [M]Hodgkin's disease NOS                                     |
| BBk..00   | [M]Lymphomas, nodular or follicular                          |
| BBk0.00   | [M]Malignant lymphoma, nodular NOS                           |
| BBk0.11   | [M]Brill - Symmers' disease                                  |
| BBk0.12   | [M]Follicular lymphosarcoma NOS                              |
| BBk0.13   | [M]Giant follicular lymphoma                                 |
| BBk0.14   | [M]Nodular lymphosarcoma NOS                                 |
| BBk1.00   | [M]Malig lymphoma, mixed lymphocytic-histiocytic, nodular    |
| BBk1.11   | [M]Reticulolymphosarcoma, follicular                         |
| BBk1.12   | [M]Reticulolymphosarcoma, nodular                            |
| BBk2.00   | [M]Malignant lymphoma, centroblastic-centrocytic, follicular |
| BBk2.11   | [M]Germinoblastoma, follicular                               |
| BBk3.00   | [M]Malig lymphoma, lymphocytic, well differentiated,nodular  |
| BBk4.00   | [M]Malig lymph, lymphocytic, intermediate different, nodular |
| BBk5.00   | [M]Malig lymph, follicular centre cell, cleaved, follicular  |
| BBk6.00   | [M]Malig lymph, lymphocytic, poorly differentiated, nodular  |
| BBk7.00   | [M]Malignant lymphoma, centroblastic type, follicular        |
| BBk7.11   | [M]Germinoblastic sarcoma, follicular                        |
| BBk8.00   | [M]Malig lymph,follicular centre cell,noncleaved,follicular  |
| BBkz.00   | [M]Lymphoma, nodular or follicular NOS                       |
| BBl..00   | [M]Mycosis fungoides                                         |
| BBl0.00   | [M]Mycosis fungoides                                         |
| BBl1.00   | [M]Sezary's disease                                          |
| BBlz.00   | [M]Mycosis fungoides NOS                                     |
| BBm..00   | [M]Miscellaneous reticuloendothelial neoplasms               |
| BBm0.00   | [M]Microglioma                                               |
| BBm1.00   | [M]Malignant histiocytosis                                   |
| BBm1.11   | [M]Malignant reticulosis                                     |
| BBm2.00   | [M]Histiocytic medullary reticulosis                         |
| BBm3.00   | [M]Letterer - Siwe disease                                   |
| BBm3.11   | [M]Acute infancy reticulosis                                 |
| BBm3.12   | [M]Acute progressive histiocytosis X                         |
| BBm4.00   | [M]True histiocytic lymphoma                                 |
| BBm5.00   | [M] Peripheral T-cell lymphoma NOS                           |
| BBm6.00   | [M] Alpha heavy chain disease                                |

| Read Code | Description                                                |
|-----------|------------------------------------------------------------|
| BBm7.00   | [M] Monoclonal gammopathy                                  |
| BBm8.00   | [M] Angioimmunoblastic lymphadenopathy                     |
| BBm9.00   | [M] Monocytoid B-cell lymphoma                             |
| BBmA.00   | [M] Refractory anaemia with sideroblasts                   |
| BBmB.00   | [M]Refractory anaemia+excess of blasts with transformation |
| BBmC.00   | [M] T-gamma lymphoproliferative disease                    |
| BBmD.00   | [M] Cutaneous lymphoma                                     |
| BBmE.00   | [M] Gamma heavy chain disease                              |
| BBmF.00   | [M] Angiocentric immunoproliferative lesion                |
| BBmG.00   | [M] Immunoproliferative small intestinal disease           |
| BBmH.00   | [M] Large cell lymphoma                                    |
| BBmJ.00   | [M] Angioendotheliomatosis                                 |
| BBmK.00   | [M]Waldenstrom's macroglobulinaemia                        |
| BBmL.00   | [M] Refractory anaemia with excess of blasts               |
| BBmz.00   | [M]Miscellaneous reticuloendothelial neoplasm NOS          |
| BBn..00   | [M]Plasma cell tumours                                     |
| BBn0.00   | [M]Plasma cell myeloma                                     |
| BBn0.11   | [M]Multiple myeloma                                        |
| BBn0.12   | [M]Myeloma NOS                                             |
| BBn0.13   | [M]Myelomatosis                                            |
| BBn0.14   | [M]Plasmacytic myeloma                                     |
| BBn1.00   | [M]Plasma cell tumour, benign                              |
| BBn1.11   | [M]Plasmacytoma, benign                                    |
| BBn2.00   | [M]Plasmacytoma NOS                                        |
| BBn2.11   | [M]Monostotic myeloma                                      |
| BBn2.12   | [M]Solitary myeloma                                        |
| BBn3.00   | [M]Plasma cell tumour, malignant                           |
| BBnz.00   | [M]Plasma cell tumour NOS                                  |
| BBp..00   | [M]Mast cell tumours                                       |
| BBp0.00   | [M]Mastocytoma NOS                                         |
| BBp1.00   | [M]Mast cell sarcoma                                       |
| BBp2.00   | [M]Malignant mastocytosis                                  |
| BBpz.00   | [M]Mast cell tumour NOS                                    |
| BBq..00   | [M]Burkitt's tumours                                       |
| BBq0.00   | [M]Burkitt's tumour                                        |
| BBqz.00   | [M]Burkitt's tumour NOS                                    |
| BBr..00   | [M]Leukaemias                                              |
| BBr0.00   | [M]Leukaemias unspecified                                  |
| BBr0000   | [M]Leukaemia NOS                                           |
| BBr0100   | [M]Acute leukaemia NOS                                     |
| BBr0111   | [M]Blast cell leukaemia                                    |
| BBr0112   | [M]Blastic leukaemia                                       |
| BBr0113   | [M]Stem cell leukaemia                                     |
| BBr0200   | [M]Subacute leukaemia NOS                                  |



| Read Code | Description                          |
|-----------|--------------------------------------|
| BBr0300   | [M]Chronic leukaemia NOS             |
| BBr0400   | [M]Aleukaemic leukaemia NOS          |
| BBr0z00   | [M]Leukaemia unspecified, NOS        |
| BBr1.00   | [M]Compound leukaemias               |
| BBr1000   | [M]Compound leukaemia                |
| BBr1011   | [M]Mixed leukaemia                   |
| BBr1z00   | [M]Compound leukaemia NOS            |
| BBr2.00   | [M]Lymphoid leukaemias               |
| BBr2000   | [M]Lymphoid leukaemia NOS            |
| BBr2011   | [M]Lymphatic leukaemia               |
| BBr2100   | [M]Acute lymphoid leukaemia          |
| BBr2200   | [M]Subacute lymphoid leukaemia       |
| BBr2300   | [M]Chronic lymphoid leukaemia        |
| BBr2400   | [M]Aleukaemic lymphoid leukaemia     |
| BBr2500   | [M]Prolymphocytic leukaemia          |
| BBr2600   | [M]Burkitt's cell leukaemia          |
| BBr2700   | [M]Adult T-cell leukaemia/lymphoma   |
| BBr2z00   | [M]Other lymphoid leukaemia NOS      |
| BBr3.00   | [M]Plasma cell leukaemias            |
| BBr3000   | [M]Plasma cell leukaemia             |
| BBr3z00   | [M]Plasma cell leukaemia NOS         |
| BBr4.00   | [M]Erythroleukaemias                 |
| BBr4000   | [M]Erythroleukaemia                  |
| BBr4011   | [M]Erythraemic myelosis              |
| BBr4100   | [M]Acute erythraemia                 |
| BBr4111   | [M]Di Guglielmo's disease            |
| BBr4200   | [M]Chronic erythraemia               |
| BBr4z00   | [M]Erythroleukaemia NOS              |
| BBr5.00   | [M]Lymphosarcoma cell leukaemias     |
| BBr5000   | [M]Lymphosarcoma cell leukaemia      |
| BBr5z00   | [M]Lymphosarcoma cell leukaemia NOS  |
| BBr6.00   | [M]Myeloid leukaemias                |
| BBr6000   | [M]Myeloid leukaemia NOS             |
| BBr6011   | [M]Granulocytic leukaemia NOS        |
| BBr6012   | [M]Myelosis NOS                      |
| BBr6100   | [M]Acute myeloid leukaemia           |
| BBr6200   | [M]Subacute myeloid leukaemia        |
| BBr6300   | [M]Chronic myeloid leukaemia         |
| BBr6311   | [M]Naegeli-type monocytic leukaemia  |
| BBr6400   | [M]Aleukaemic myeloid leukaemia      |
| BBr6500   | [M]Neutrophilic leukaemia            |
| BBr6600   | [M]Acute promyelocytic leukaemia     |
| BBr6700   | [M]Acute myelomonocytic leukaemia    |
| BBr6800   | [M]Chronic myelomonocytic leukaemia  |
| BBr6900   | [M]Juvenile myelomonocytic leukaemia |

| Read Code | Description                                                  |
|-----------|--------------------------------------------------------------|
| BBr6z00   | [M]Other myeloid leukaemia NOS                               |
| BBr7.00   | [M]Basophilic leukaemias                                     |
| BBr7000   | [M]Basophilic leukaemia                                      |
| BBr7z00   | [M]Basophilic leukaemia NOS                                  |
| BBr8.00   | [M]Eosinophilic leukaemias                                   |
| BBr8000   | [M]Eosinophilic leukaemia                                    |
| BBr8z00   | [M]Eosinophilic leukaemia NOS                                |
| BBr9.00   | [M]Monocytic leukaemias                                      |
| BBr9000   | [M]Monocytic leukaemia NOS                                   |
| BBr9011   | [M]Histiocytic leukaemia                                     |
| BBr9012   | [M]Schilling-type monocytic leukaemia                        |
| BBr9100   | [M]Acute monocytic leukaemia                                 |
| BBr9200   | [M]Subacute monocytic leukaemia                              |
| BBr9300   | [M]Chronic monocytic leukaemia                               |
| BBr9400   | [M]Aleukaemic monocytic leukaemia                            |
| BBr9z00   | [M]Other monocytic leukaemia NOS                             |
| BBrA.00   | [M]Miscellaneous leukaemias                                  |
| BBrA000   | [M]Mast cell leukaemia                                       |
| BBrA100   | [M]Megakaryocytic leukaemia                                  |
| BBrA111   | [M]Thrombocytic leukaemia                                    |
| BBrA200   | [M]Megakaryocytic myelosis                                   |
| BBrA300   | [M]Myeloid sarcoma                                           |
| BBrA311   | [M]Chloroma                                                  |
| BBrA312   | [M]Granulocytic sarcoma                                      |
| BBrA400   | [M]Hairy cell leukaemia                                      |
| BBrA411   | [M]Leukaemic reticuloendotheliosis                           |
| BBrA500   | [M]Acute megakaryoblastic leukaemia                          |
| BBrA600   | [M]Acute panmyelosis                                         |
| BBrA700   | [M]Acute myelofibrosis                                       |
| BBrA800   | [M]Leukaemic reticuloendotheliosis                           |
| BBrAz00   | [M]Miscellaneous leukaemia NOS                               |
| BBrz.00   | [M]Leukaemia NOS                                             |
| BBs..00   | [M]Misc myeloproliferative and lymphoproliferative disorders |
| BBs0.00   | [M]Polycythaemia vera                                        |
| BBs0.11   | [M]Polycythaemia rubra vera                                  |
| BBs1.00   | [M]Acute panmyelosis                                         |
| BBs2.00   | [M]Chronic myeloproliferative disease                        |
| BBs3.00   | [M]Myelosclerosis with myeloid metaplasia                    |
| BBs3.11   | [M]Megakaryocytic myelosclerosis                             |
| BBs5.00   | [M]Chronic lymphoproliferative disease                       |
| BBsz.00   | [M]Misc myeloproliferative or lymphoproliferative dis NOS    |
| BBv..00   | [M]Myelodysplastic syndrome                                  |
| BBv0.00   | [M]Monocytoid B-cell lymphoma                                |
| BBv1.00   | [M]Angioendotheliomatosis                                    |

| Read Code | Description                                                   |
|-----------|---------------------------------------------------------------|
| BBv2.00   | [M]AngiocentricT-cell lymphoma                                |
| BBy1.00   | [M]No microscopic confirmation of tumour, clinically malig    |
| BBy2.00   | [M]No microscopic confirmation tumour, clinically metastatic  |
| Byu0.00   | [X]Malignant neoplasm of lip, oral cavity and pharynx         |
| Byu1.00   | [X]Malignant neoplasm of digestive organs                     |
| Byu1000   | [X]Other sarcomas of the liver                                |
| Byu1100   | [X]Other specified carcinomas of liver                        |
| Byu1200   | [X]Malignant neoplasm of intestinal tract, part unspecified   |
| Byu1300   | [X]Malignant neoplasm/ill-defin sites within digestive system |
| Byu2.00   | [X]Malignant neoplasm of respiratory and intrathoracic orga   |
| Byu2000   | [X]Malignant neoplasm of bronchus or lung, unspecified        |
| Byu2100   | [X]Malignant neoplasm/overlap lesion/heart,mediastinm+pleura  |
| Byu2200   | [X]Malignant neoplasm/upper resp tract, part unspecified      |
| Byu2300   | [X]Malignant neopl/overlapping les/resp+intrathoracic organs  |
| Byu2400   | [X]Malignant neoplasm/ill-defined sites within resp system    |
| Byu2500   | [X]Malignant neoplasm of mediastinum, part unspecified        |
| Byu3.00   | [X]Malignant neoplasm of bone and articular cartilage         |
| Byu3000   | [X]Mal neoplasm/overlap lesion/bone+articular cartilage/limb  |
| Byu3100   | [X]Malignant neoplasm/bones+articular cartilage/limb,unspfd   |
| Byu3200   | [X]Malignant neoplasm/overlap lesion/bone+articulr cartilage  |
| Byu3300   | [X]Malignant neoplasm/bone+articular cartilage, unspecified   |
| Byu4.00   | [X]Melanoma and other malignant neoplasms of skin             |
| Byu4000   | [X]Malignant melanoma of other+unspecified parts of face      |
| Byu4100   | [X]Malignant melanoma of skin, unspecified                    |
| Byu4200   | [X]Oth malignant neoplasm/skin of oth+unspecfd parts of face  |
| Byu4300   | [X]Malignant neoplasm of skin, unspecified                    |
| Byu5.00   | [X]Malignant neoplasm of mesothelial and soft tissue          |
| Byu5000   | [X]Mesothelioma of other sites                                |
| Byu5011   | [X]Mesothelioma of lung                                       |
| Byu5100   | [X]Mesothelioma, unspecified                                  |
| Byu5200   | [X]Kaposi's sarcoma of multiple organs                        |
| Byu5300   | [X]Kaposi's sarcoma, unspecified                              |
| Byu5400   | [X]Malignant neoplasm/peripheral nerves of trunk,unspecified  |
| Byu5500   | [X]Mal neoplasm/overlap les/periph nerv+autonomic nerv systm  |
| Byu5600   | [X]Mal neoplasm/periph nerves+autonomic nervous system,unspc  |
| Byu5700   | [X]Malignant neoplasm of peritoneum, unspecified              |

| Read Code | Description                                                  |
|-----------|--------------------------------------------------------------|
| Byu5800   | [X]Mal neoplasm/connective+soft tissue of trunk,unspecified  |
| Byu5900   | [X]Malignant neoplasm/connective + soft tissue,unspecified   |
| Byu5A00   | [X]Malignant neoplasm overlapping lesion of skin             |
| Byu5B00   | [X]Kaposi's sarcoma of other sites                           |
| Byu6.00   | [X]Malignant neoplasm of breast                              |
| Byu7.00   | [X]Malignant neoplasm of female genital organs               |
| Byu7000   | [X]Malignant neoplasm of uterine adnexa, unspecified         |
| Byu7100   | [X]Malignant neoplasm/other specified female genital organs  |
| Byu7200   | [X]Malignant neoplasm/overlapping lesion/feml genital organs |
| Byu7300   | [X]Malignant neoplasm of female genital organ, unspecified   |
| Byu8.00   | [X]Malignant neoplasm of male genital organs                 |
| Byu8000   | [X]Malignant neoplasm/other specified male genital organs    |
| Byu8100   | [X]Malignant neoplasm/overlapping lesion/male genital organs |
| Byu8200   | [X]Malignant neoplasm of male genital organ, unspecified     |
| Byu9.00   | [X]Malignant neoplasm of urinary tract                       |
| Byu9000   | [X]Malignant neoplasm of urinary organ, unspecified          |
| ByuA.00   | [X]Malignant neoplasm of eye, brain and other parts of cent  |
| ByuA000   | [X]Malignant neoplasm/other and unspecified cranial nerves   |
| ByuA100   | [X]Malignant neoplasm/central nervous system, unspecified    |
| ByuA200   | [X]Malignant neoplasm of meninges, unspecified               |
| ByuA300   | [X]Malig neopl, overlap lesion brain & other part of CNS     |
| ByuB.00   | [X]Malignant neoplasm of thyroid and other endocrine glands  |
| ByuB000   | [X]Malignant neoplasm-pluriglandular involvement,unspecified |
| ByuB100   | [X]Malignant neoplasm of endocrine gland, unspecified        |
| ByuC.00   | [X]Malignant neoplasm of ill-defined, secondary and unspeci  |
| ByuC000   | [X]Malignant neoplasm of other specified sites               |
| ByuC100   | [X]Malignant neoplasm/overlap lesion/other+ill-defined sites |
| ByuC200   | [X]2ndry+unspcf malignant neoplasm lymph nodes/multi regions |
| ByuC300   | [X]Secondary malignant neoplasm/oth+unspc respiratory organs |
| ByuC400   | [X]Secondary malignant neoplasm/oth+unspcfd digestive organs |
| ByuC500   | [X]2ndry malignant neoplasm/bladder+oth+unsp urinary organs  |
| ByuC600   | [X]2ndry malignant neoplasm/oth+unspec parts/nervous system  |
| ByuC700   | [X]Secondary malignant neoplasm of other specified sites     |
| ByuC800   | [X]Malignant neoplasm without specification of site          |
| ByuD.00   | [X]Malignant neoplasms of lymphoid, haematopoietic and rela  |

| Read Code | Description                                                  |
|-----------|--------------------------------------------------------------|
| ByuD000   | [X]Other Hodgkin's disease                                   |
| ByuD100   | [X]Other types of follicular non-Hodgkin's lymphoma          |
| ByuD200   | [X]Other types of diffuse non-Hodgkin's lymphoma             |
| ByuD300   | [X]Other specified types of non-Hodgkin's lymphoma           |
| ByuD400   | [X]Other malignant immunoproliferative diseases              |
| ByuD500   | [X]Other lymphoid leukaemia                                  |
| ByuD600   | [X]Other myeloid leukaemia                                   |
| ByuD700   | [X]Other monocytic leukaemia                                 |
| ByuD800   | [X]Other specified leukaemias                                |
| ByuD900   | [X]Other leukaemia of unspecified cell type                  |
| ByuDA00   | [X]Oth spcf mal neoplsm/lymphoid,haematopoietic+rldt tissue  |
| ByuDB00   | [X]Mal neoplasm/lymphoid,haematopoietic+related tissu,unspcf |
| ByuDC00   | [X]Diffuse non-Hodgkin's lymphoma, unspecified               |
| ByuDD00   | [X]Oth and unspecif peripheral & cutaneous T-cell lymphomas  |
| ByuDE00   | [X]Unspecified B-cell non-Hodgkin's lymphoma                 |
| ByuDF00   | [X]Non-Hodgkin's lymphoma, unspecified type                  |
| ByuDF11   | [X]Non-Hodgkin's lymphoma NOS                                |
| ByuE.00   | [X]Malignant neoplasms/independent (primary) multiple sites  |
| ByuE000   | [X]Malignant neoplasms/independent(primary)multiple sites    |
| ByuF.00   | [X]In situ neoplasms                                         |
| ByuF000   | [X]Carcinoma in situ/other+unspecified parts of intestine    |
| ByuF100   | [X]Carcinoma in situ of other specified digestive organs     |
| ByuF200   | [X]Carcinoma in situ of digestive organ, unspecified         |
| ByuF300   | [X]Carcinoma in situ of other parts of respiratory system    |
| ByuF400   | [X]Carcinoma in situ of respiratory system, unspecified      |
| ByuF500   | [X]Melanoma in situ of other and unspecified parts of face   |
| ByuF600   | [X]Melanoma in situ of other sites                           |
| ByuF700   | [X]Carcinoma in situ of skin of other+unspecified parts/face |
| ByuF800   | [X]Carcinoma in situ of skin of other sites                  |
| ByuF900   | [X]Carcinoma in situ of skin, unspecified                    |
| ByuFA00   | [X]Carcinoma in situ of other parts of cervix                |
| ByuFB00   | [X]Carcinoma in situ of other+unspcfd female genital organs  |
| ByuFC00   | [X]Carcinoma in situ of oth+unspecified male genital organs  |
| ByuFD00   | [X]Carcinoma in situ of other+unspecified urinary organs     |
| ByuFE00   | [X]Carcinoma in situ of other specified sites                |
| ByuFF00   | [X]Melanoma in situ, unspecified                             |
| ByuFG00   | [X]Other carcinoma in situ of breast                         |
| ByuH.00   | [X]Neoplasms of uncertain and unknown behaviour              |
| ByuH000   | [X]Neoplasm/uncertain+unknown behaviour/oth digestive organs |

| Read Code | Description                                                       |
|-----------|-------------------------------------------------------------------|
| ByuH100   | [X]Neoplasm/uncertain+unknown behavior/oth respirtory organs      |
| ByuH200   | [X]Neoplasm/uncertain+unknown behavior/oth fem genital organ      |
| ByuH300   | [X]Neoplasm/uncertain+unknown behavior/oth male genital organ     |
| ByuH400   | [X]Neoplasm/uncertain+unknown behavior/other urinary organs       |
| ByuH500   | [X]Neoplasm/uncertain+unknown behaviour/other parts/CNS           |
| ByuH600   | [X]Neoplasm/uncertain+unknown behavior/oth myelodysplastic synd   |
| ByuH700   | [X]Oth specf neo/uncrt+unkwn behav/lymph,h'matopetic+rel tis      |
| ByuH800   | [X]Neo/uncertain+unknown behav/lymph,h'matopetic+rel tiss,unspecf |
| ByuH900   | [X]Neoplasm/uncertain+unknown behavior/other specified sites      |
| ByuHA00   | [X]Neoplasm of uncertain and unknown behaviour, unspecified       |
| ByuHB00   | [X]Neoplasm of uncert/unkn behav female genit organs, unspec      |
| C377.00   | Disorders of glycoprotein metabolism                              |
| C377000   | Defects in post-translational modif'n of lysosomal enzymes        |
| C37y.00   | Other specified disorder of metabolism                            |
| C37y000   | Hand - Schuller - Christian disease                               |
| C37y100   | Eosinophilic granuloma                                            |
| C37y200   | Enterokinase deficiency                                           |
| C37y300   | Trypsinogen deficiency                                            |
| C37y400   | Acatlasia                                                         |
| C37y500   | Histiocytosis X , chronic                                         |
| C37y600   | Histiocytosis X , unspecified                                     |
| C37y700   | Histiocytosis, unspecified                                        |
| C37y800   | Haemophagocytic lymphohistiocytosis                               |
| C37y900   | Haemophagocytic syndrome, infection-associated                    |
| C37yz00   | Other specified disorder of metabolism NOS                        |
| C37yz11   | Histiocytosis X (chronic)                                         |
| D416.00   | Familial polycythaemia                                            |
| Z9J1112   | Preparing chemotherapy                                            |
| ZL22F00   | Under care of oncology nurse                                      |
| ZL62F00   | Referral to oncology nurse                                        |
| ZLA2F00   | Seen by oncology nurse                                            |
| ZLD7D00   | Discharge by oncology nurse                                       |
| ZLE3.00   | Discharge from clinical oncology service                          |
| ZLE7300   | Discharge from paediatric oncology service                        |
| ZV10000   | [V]Personal history of malig neop of gastrointestinal tract       |
| ZV10011   | [V]Personal history of malignant neoplasm of anus                 |
| ZV10012   | [V]Personal history of malig neop of gastrointestinal tract       |

| Read Code | Description                                                  |
|-----------|--------------------------------------------------------------|
| ZV10013   | [V]Personal history of malignant neoplasm of intestine       |
| ZV10014   | [V]Personal history of malignant neoplasm of large intestine |
| ZV10015   | [V]Personal history of malignant neoplasm of liver           |
| ZV10016   | [V]Personal history of malignant neoplasm of oesophagus      |
| ZV10017   | [V]Personal history of malignant neoplasm of rectum          |
| ZV10018   | [V]Personal history of malignant neoplasm of stomach         |
| ZV10019   | [V]Personal history of malignant neoplasm of tongue          |
| ZV10111   | [V]Personal history of malignant neoplasm of bronchus        |
| ZV10112   | [V]Personal history of malignant neoplasm of lung            |
| ZV10113   | [V]Personal history of malignant neoplasm of trachea         |
| ZV10212   | [V]Personal history of malignant neoplasm of larynx          |
| ZV10300   | [V]Personal history of malignant neoplasm of breast          |
| ZV10411   | [V]Personal history of malignant neoplasm of cervix uteri    |
| ZV10413   | [V]Personal history malignant neoplasm - male genital organ  |
| ZV10414   | [V]Personal history of malignant neoplasm of ovary           |
| ZV10415   | [V]Personal history of malignant neoplasm of prostate        |
| ZV10416   | [V]Personal history of malignant neoplasm of testis          |
| ZV10511   | [V]Personal history of malignant neoplasm of bladder         |
| ZV10512   | [V]Personal history of malignant neoplasm of kidney          |
| ZV10513   | [V]Personal history of malignant neoplasm of kidney          |
| ZV10600   | [V]Personal history of leukaemia                             |
| ZV10611   | [V]Personal history of lymphoid leukaemia                    |
| ZV10612   | [V]Personal history of monocytic leukaemia                   |
| ZV10613   | [V]Personal history of myeloid leukaemia                     |
| ZV10711   | [V]Personal history of Hodgkin's disease                     |
| ZV10y11   | [V]Personal history of malignant neoplasm of bone            |
| ZV10y13   | [V]Personal history of malignant neoplasm of eye             |
| ZV10y14   | [V]Personal history of malignant neoplasm of skin            |
| ZV10y15   | [V]Personal history of malignant neoplasm of thyroid         |
| ZV10y16   | [V]Personal history of malignant neoplasm of tongue          |
| ZV58100   | [V]Maintenance chemotherapy                                  |
| ZV58800   | [V]Chemotherapy session for neoplasm                         |
| ZV66200   | [V]Convalescence after chemotherapy                          |
| ZV67200   | [V]Chemotherapy follow-up                                    |
| ZV67800   | [V]Follow-up examin after chemotherapy for malign neoplasm   |
| ZV67811   | [V]Follow-up examination after chemotherapy for leukaemia    |
| ZV6B100   | [V]Follow-up exam after chemotherapy for other conditions    |
| ZVu3L00   | [X]Other chemotherapy                                        |

**Supplementary Table 10.** Read codes used to identify chronic obstructive pulmonary disease.

| <b>Read Code</b> | <b>Description</b>                                           |
|------------------|--------------------------------------------------------------|
| 14B3.00          | H/O: chr.obstr. airway disease                               |
| 3375.00          | Lung function mildly obstruct.                               |
| 337C.00          | Obstructive ventilatory defect                               |
| 661M300          | COPD self-management plan agreed                             |
| 661N300          | COPD self-management plan review                             |
| 663..12          | Chronic resp. dis. monitoring                                |
| 66YB.00          | Chronic obstructive pulmonary disease monitoring             |
| 66YB000          | Chronic obstructive pulmonary disease 3 monthly review       |
| 66YB100          | Chronic obstructive pulmonary disease 6 monthly review       |
| 66YD.00          | Chronic obstructive pulmonary disease monitoring due         |
| 66YI.00          | COPD self-management plan given                              |
| 66YL.00          | Chronic obstructive pulmonary disease follow-up              |
| 66YL.11          | COPD follow-up                                               |
| 66YL.12          | COAD follow-up                                               |
| 66YM.00          | Chronic obstructive pulmonary disease annual review          |
| 66YS.00          | Chronic obstructive pulmonary disease monitoring by nurse    |
| 66YT.00          | Chronic obstructive pulmonary disease monitoring by doctor   |
| 66Yd.00          | COPD accident and emergency attendance since last visit      |
| 66Ye.00          | Emergency COPD admission since last appointment              |
| 66Yf.00          | Number of COPD exacerbations in past year                    |
| 66Yg.00          | Chronic obstructive pulmonary disease disturbs sleep         |
| 66Yh.00          | Chronic obstructive pulmonary disease does not disturb sleep |
| 66Yi.00          | Multiple COPD emergency hospital admissions                  |
| 68C2.00          | Chr.obst. pulm. dis. screen                                  |
| 8BMW.00          | Issue of chronic obstructive pulmonary disease rescue pack   |
| 8CE6.00          | Chronic obstructive pulmonary disease leaflet given          |
| 8CR1.00          | Chronic obstructive pulmonary disease clini management plan  |
| 8CeD.00          | Preferred place of care for next exacerbation of COPD        |
| 8H2R.00          | Admit COPD emergency                                         |
| 8Hkw.00          | Referral to COPD community nursing team                      |
| 9N4W.00          | DNA - Did not attend COPD clinic                             |
| 9NgP.11          | On COPD (chr obstruc pulmonary disease) supportv cre pathway |
| 9Oi..00          | Chronic obstructive pulmonary disease monitoring admin       |
| 9Oi0.00          | Chronic obstructive pulmonary disease monitoring 1st letter  |
| 9Oi1.00          | Chronic obstructive pulmonary disease monitoring 2nd letter  |
| 9Oi2.00          | Chronic obstructive pulmonary disease monitoring 3rd letter  |
| 9Oi3.00          | Chronic obstructive pulmonary disease monitoring verb invite |
| 9Oi4.00          | Chronic obstructive pulmonary disease monitor phone invite   |
| 9e03.00          | GP OOH service notified of COPD care plan                    |
| 9kf..00          | COPD - enhanced services administration                      |
| 9kf0.00          | COPD patient unsuitable for pulmonary rehab - enh serv admin |
| 9kf0.11          | COPD patient unsuitable for pulmonary rehabilitation         |
| 9kf1.00          | Refer COPD structured smoking assessment - enhanc serv admin |



| <b>Read Code</b> | <b>Description</b>                                           |
|------------------|--------------------------------------------------------------|
| 9kf1.11          | Referred for COPD structured smoking assessment              |
| 9kf2.00          | COPD structured smoking assessment declined - enh serv admin |
| 9kf2.11          | COPD structured smoking assessment declined                  |
| H3...00          | Chronic obstructive pulmonary disease                        |
| H3...11          | Chronic obstructive airways disease                          |
| H31..00          | Chronic bronchitis                                           |
| H310.00          | Simple chronic bronchitis                                    |
| H310z00          | Simple chronic bronchitis NOS                                |
| H311.00          | Mucopurulent chronic bronchitis                              |
| H311000          | Purulent chronic bronchitis                                  |
| H311100          | Fetid chronic bronchitis                                     |
| H311z00          | Mucopurulent chronic bronchitis NOS                          |
| H312.00          | Obstructive chronic bronchitis                               |
| H312000          | Chronic asthmatic bronchitis                                 |
| H312011          | Chronic wheezy bronchitis                                    |
| H312100          | Emphysematous bronchitis                                     |
| H312200          | Acute exacerbation of chronic obstructive airways disease    |
| H312z00          | Obstructive chronic bronchitis NOS                           |
| H313.00          | Mixed simple and mucopurulent chronic bronchitis             |
| H31y.00          | Other chronic bronchitis                                     |
| H31y000          | Chronic tracheitis                                           |
| H31y100          | Chronic tracheobronchitis                                    |
| H31yz00          | Other chronic bronchitis NOS                                 |
| H31z.00          | Chronic bronchitis NOS                                       |
| H32..00          | Emphysema                                                    |
| H320.00          | Chronic bullous emphysema                                    |
| H320000          | Segmental bullous emphysema                                  |
| H320100          | Zonal bullous emphysema                                      |
| H320200          | Giant bullous emphysema                                      |
| H320300          | Bullous emphysema with collapse                              |
| H320z00          | Chronic bullous emphysema NOS                                |
| H321.00          | Panlobular emphysema                                         |
| H322.00          | Centrilobular emphysema                                      |
| H32y.00          | Other emphysema                                              |
| H32y000          | Acute vesicular emphysema                                    |
| H32y100          | Atrophic (senile) emphysema                                  |
| H32y111          | Acute interstitial emphysema                                 |
| H32y200          | MacLeod's unilateral emphysema                               |
| H32yz00          | Other emphysema NOS                                          |
| H32z.00          | Emphysema NOS                                                |
| H36..00          | Mild chronic obstructive pulmonary disease                   |
| H37..00          | Moderate chronic obstructive pulmonary disease               |
| H38..00          | Severe chronic obstructive pulmonary disease                 |
| H39..00          | Very severe chronic obstructive pulmonary disease            |
| H3y..00          | Other specified chronic obstructive airways disease          |

| <b>Read Code</b> | <b>Description</b>                                           |
|------------------|--------------------------------------------------------------|
| H3y..11          | Other specified chronic obstructive pulmonary disease        |
| H3y0.00          | Chronic obstruct pulmonary dis with acute lower resp infectn |
| H3y1.00          | Chron obstruct pulmonary dis wth acute exacerbation, unspec  |
| H3z..00          | Chronic obstructive airways disease NOS                      |
| H3z..11          | Chronic obstructive pulmonary disease NOS                    |
| H464.00          | Chronic respiratory conditions due to chemical fumes         |
| H464z00          | Chronic respiratory conditions due to chemical fumes NOS     |
| H581.00          | Interstitial emphysema                                       |
| H582.00          | Compensatory emphysema                                       |
| H591.00          | Chronic respiratory failure                                  |
| Hyu3.00          | [X]Chronic lower respiratory diseases                        |
| Hyu3000          | [X]Other emphysema                                           |
| Hyu3100          | [X]Other specified chronic obstructive pulmonary disease     |

**Supplementary Table 11.** Read codes used to identify peptic ulcer disease.

| <b>Read Code</b> | <b>Description</b>                                           |
|------------------|--------------------------------------------------------------|
| J102.00          | Ulcer of oesophagus                                          |
| J102000          | Peptic ulcer of oesophagus                                   |
| J102z00          | Ulcer of oesophagus NOS                                      |
| 1956.00          | Peptic ulcer symptoms                                        |
| 761J.11          | Stomach ulcer operations                                     |
| 761J000          | Closure of perforated gastric ulcer                          |
| 761J111          | Suture of ulcer of stomach NEC                               |
| 7627000          | Closure of perforated duodenal ulcer                         |
| J11..00          | Gastric ulcer - (GU)                                         |
| J11..11          | Prepyloric ulcer                                             |
| J11..12          | Pyloric ulcer                                                |
| J110.00          | Acute gastric ulcer                                          |
| J110000          | Acute gastric ulcer without mention of complication          |
| J110100          | Acute gastric ulcer with haemorrhage                         |
| J110111          | Bleeding acute gastric ulcer                                 |
| J110200          | Acute gastric ulcer with perforation                         |
| J110300          | Acute gastric ulcer with haemorrhage and perforation         |
| J110400          | Acute gastric ulcer with obstruction                         |
| J110y00          | Acute gastric ulcer unspecified                              |
| J110z00          | Acute gastric ulcer NOS                                      |
| J111.00          | Chronic gastric ulcer                                        |
| J111000          | Chronic gastric ulcer without mention of complication        |
| J111100          | Chronic gastric ulcer with haemorrhage                       |
| J111111          | Bleeding chronic gastric ulcer                               |
| J111200          | Chronic gastric ulcer with perforation                       |
| J111211          | Perforated chronic gastric ulcer                             |
| J111300          | Chronic gastric ulcer with haemorrhage and perforation       |
| J111400          | Chronic gastric ulcer with obstruction                       |
| J111y00          | Chronic gastric ulcer unspecified                            |
| J111z00          | Chronic gastric ulcer NOS                                    |
| J112.00          | Anti-platelet induced gastric ulcer                          |
| J112z00          | Anti-platelet induced gastric ulcer NOS                      |
| J113.00          | Non steroidal anti inflammatory drug induced gastric ulcer   |
| J113z00          | Non steroidal anti inflammatory drug induced gastric ulc NOS |
| J11y.00          | Unspecified gastric ulcer                                    |
| J11y000          | Unspecified gastric ulcer without mention of complication    |
| J11y100          | Unspecified gastric ulcer with haemorrhage                   |
| J11y200          | Unspecified gastric ulcer with perforation                   |
| J11y300          | Unspecified gastric ulcer with haemorrhage and perforation   |
| J11y400          | Unspecified gastric ulcer with obstruction                   |
| J11yy00          | Unspec gastric ulcer; unspec haemorrhage and/or perforation  |
| J11yz00          | Unspecified gastric ulcer NOS                                |

| <b>Read Code</b> | <b>Description</b>                                           |
|------------------|--------------------------------------------------------------|
| J11z.00          | Gastric ulcer NOS                                            |
| J11z.11          | Gastric erosions                                             |
| J11z.12          | Multiple gastric ulcers                                      |
| J12..00          | Duodenal ulcer - (DU)                                        |
| J120.00          | Acute duodenal ulcer                                         |
| J120000          | Acute duodenal ulcer without mention of complication         |
| J120100          | Acute duodenal ulcer with haemorrhage                        |
| J120200          | Acute duodenal ulcer with perforation                        |
| J120300          | Acute duodenal ulcer with haemorrhage and perforation        |
| J120400          | Acute duodenal ulcer with obstruction                        |
| J120y00          | Acute duodenal ulcer unspecified                             |
| J120z00          | Acute duodenal ulcer NOS                                     |
| J121.00          | Chronic duodenal ulcer                                       |
| J121000          | Chronic duodenal ulcer without mention of complication       |
| J121100          | Chronic duodenal ulcer with haemorrhage                      |
| J121111          | Bleeding chronic duodenal ulcer                              |
| J121200          | Chronic duodenal ulcer with perforation                      |
| J121211          | Perforated chronic duodenal ulcer                            |
| J121300          | Chronic duodenal ulcer with haemorrhage and perforation      |
| J121400          | Chronic duodenal ulcer with obstruction                      |
| J121y00          | Chronic duodenal ulcer unspecified                           |
| J121z00          | Chronic duodenal ulcer NOS                                   |
| J122.00          | Duodenal ulcer disease                                       |
| J123.00          | Duodenal erosion                                             |
| J124.00          | Recurrent duodenal ulcer                                     |
| J125.00          | Anti-platelet induced duodenal ulcer                         |
| J125z00          | Anti-platelet induced duodenal ulcer NOS                     |
| J126.00          | Non steroidal anti inflammatory drug induced duodenal ulcer  |
| J126z00          | Non steroidal anti inflammatory drug induced duoden ulc NOS  |
| J12y.00          | Unspecified duodenal ulcer                                   |
| J12y000          | Unspecified duodenal ulcer without mention of complication   |
| J12y100          | Unspecified duodenal ulcer with haemorrhage                  |
| J12y200          | Unspecified duodenal ulcer with perforation                  |
| J12y300          | Unspecified duodenal ulcer with haemorrhage and perforation  |
| J12y400          | Unspecified duodenal ulcer with obstruction                  |
| J12yy00          | Unspec duodenal ulcer; unspec haemorrhage and/or perforation |
| J12yz00          | Unspecified duodenal ulcer NOS                               |
| J12z.00          | Duodenal ulcer NOS                                           |
| J13..00          | Peptic ulcer - (PU) site unspecified                         |
| J13..11          | Stress ulcer NOS                                             |
| J130.00          | Acute peptic ulcer                                           |
| J130000          | Acute peptic ulcer without mention of complication           |
| J130100          | Acute peptic ulcer with haemorrhage                          |
| J130200          | Acute peptic ulcer with perforation                          |

| Read Code | Description                                                  |
|-----------|--------------------------------------------------------------|
| J130300   | Acute peptic ulcer with haemorrhage and perforation          |
| J130400   | Acute peptic ulcer with obstruction                          |
| J130y00   | Acute peptic ulcer unspecified                               |
| J130z00   | Acute peptic ulcer NOS                                       |
| J131.00   | Chronic peptic ulcer                                         |
| J131000   | Chronic peptic ulcer without mention of complication         |
| J131100   | Chronic peptic ulcer with haemorrhage                        |
| J131200   | Chronic peptic ulcer with perforation                        |
| J131300   | Chronic peptic ulcer with haemorrhage and perforation        |
| J131400   | Chronic peptic ulcer with obstruction                        |
| J131y00   | Chronic peptic ulcer unspecified                             |
| J131z00   | Chronic peptic ulcer NOS                                     |
| J13y.00   | Unspecified peptic ulcer                                     |
| J13y000   | Unspecified peptic ulcer without mention of complication     |
| J13y100   | Unspecified peptic ulcer with haemorrhage                    |
| J13y200   | Unspecified peptic ulcer with perforation                    |
| J13y300   | Unspecified peptic ulcer with haemorrhage and perforation    |
| J13y400   | Unspecified peptic ulcer with obstruction                    |
| J13yy00   | Unspec peptic ulcer; unspec haemorrhage and/or perforation   |
| J13yz00   | Unspecified peptic ulcer NOS                                 |
| J13z.00   | Peptic ulcer NOS                                             |
| J14..00   | Gastrojejunal ulcer (GJU)                                    |
| J14..11   | Anastomotic ulcer                                            |
| J14..12   | Gastrocolic ulcer                                            |
| J14..13   | Jejunal ulcer                                                |
| J14..14   | Marginal ulcer                                               |
| J14..15   | Stomal ulcer                                                 |
| J140.00   | Acute gastrojejunal ulcer                                    |
| J140000   | Acute gastrojejunal ulcer without mention of complication    |
| J140100   | Acute gastrojejunal ulcer with haemorrhage                   |
| J140200   | Acute gastrojejunal ulcer with perforation                   |
| J140300   | Acute gastrojejunal ulcer with haemorrhage and perforation   |
| J140400   | Acute gastrojejunal ulcer with obstruction                   |
| J140y00   | Acute gastrojejunal ulcer unspecified                        |
| J140z00   | Acute gastrojejunal ulcer NOS                                |
| J141.00   | Chronic gastrojejunal ulcer                                  |
| J141000   | Chronic gastrojejunal ulcer without mention of complication  |
| J141100   | Chronic gastrojejunal ulcer with haemorrhage                 |
| J141200   | Chronic gastrojejunal ulcer with perforation                 |
| J141300   | Chronic gastrojejunal ulcer with haemorrhage and perforation |
| J141400   | Chronic gastrojejunal ulcer with obstruction                 |
| J141y00   | Chronic gastrojejunal ulcer unspecified                      |
| J141z00   | Chronic gastrojejunal ulcer NOS                              |
| J14y.00   | Unspecified gastrojejunal ulcer                              |

| <b>Read Code</b> | <b>Description</b>                                           |
|------------------|--------------------------------------------------------------|
| J14y000          | Unspecified gastrojejunal ulcer without mention complication |
| J14y100          | Unspecified gastrojejunal ulcer with haemorrhage             |
| J14y200          | Unspecified gastrojejunal ulcer with perforation             |
| J14y300          | Unspec gastrojejunal ulcer with haemorrhage and perforation  |
| J14y400          | Unspecified gastrojejunal ulcer with obstruction             |
| J14yy00          | Unspec gastrojejunal ulcer; unspec haemorrhage/perforation   |
| J14yz00          | Unspecified gastrojejunal ulcer NOS                          |
| J14z.00          | Gastrojejunal ulcer NOS                                      |

**Supplementary Table 12.** Characteristics of the DKD and comparison cohort.

|                                  | DKD cohort<br>(N=8416) |      | Comparison cohort<br>(N=8416) |      |
|----------------------------------|------------------------|------|-------------------------------|------|
|                                  | n                      | %    | n                             | %    |
| <b>Age (years)</b>               |                        |      |                               |      |
| <40                              | 141                    | 1.7  | 141                           | 1.7  |
| 40–49                            | 620                    | 7.4  | 620                           | 7.4  |
| 50–64                            | 2506                   | 29.8 | 2506                          | 29.8 |
| 65–74                            | 2812                   | 33.4 | 2812                          | 33.4 |
| 75–89                            | 2337                   | 27.8 | 2337                          | 27.8 |
| Mean (SD)                        | 66.7                   | 11.8 | 66.7                          | 11.8 |
| <b>Sex</b>                       |                        |      |                               |      |
| Male                             | 5251                   | 62.4 | 5251                          | 62.4 |
| Female                           | 3165                   | 37.6 | 3165                          | 37.6 |
| <b>Smoking</b>                   |                        |      |                               |      |
| Non-smoker                       | 2624                   | 31.2 | 2810                          | 33.4 |
| Smoker                           | 1240                   | 14.7 | 964                           | 11.5 |
| Ex-smoker                        | 3793                   | 45.1 | 3657                          | 43.5 |
| Missing                          | 759                    | 9.0  | 985                           | 11.7 |
| <b>Alcohol (units/week)</b>      |                        |      |                               |      |
| Non-drinker                      | 1963                   | 23.3 | 1723                          | 20.5 |
| 1–2                              | 2741                   | 32.6 | 2787                          | 33.1 |
| 3–15                             | 2045                   | 24.3 | 2153                          | 25.6 |
| 16–24                            | 413                    | 4.9  | 487                           | 5.8  |
| ≥25                              | 522                    | 6.2  | 555                           | 6.6  |
| Missing                          | 732                    | 8.7  | 711                           | 8.4  |
| <b>BMI (kg/m<sup>2</sup>)</b>    |                        |      |                               |      |
| <20                              | 137                    | 1.6  | 134                           | 1.6  |
| 20–24                            | 1069                   | 12.7 | 1197                          | 14.2 |
| 25–29                            | 2660                   | 31.6 | 2962                          | 35.2 |
| ≥30                              | 4499                   | 53.5 | 4061                          | 48.3 |
| Missing                          | 51                     | 0.6  | 62                            | 0.7  |
| Mean (SD)                        | 31.5                   | 6.8  | 30.7                          | 6.3  |
| <b>Townsend index (quintile)</b> |                        |      |                               |      |
| 1st (least deprivation)          | 1541                   | 18.3 | 1855                          | 22.0 |
| 2nd                              | 1657                   | 19.7 | 1789                          | 21.3 |
| 3rd                              | 1733                   | 20.6 | 1816                          | 21.6 |
| 4th                              | 1801                   | 21.4 | 1614                          | 19.2 |
| 5th (most deprivation)           | 1437                   | 17.1 | 1135                          | 13.5 |
| Missing                          | 247                    | 2.9  | 207                           | 2.5  |
| <b>Glycemic control quality*</b> |                        |      |                               |      |
| Always ≤8%                       | 5139                   | 61.1 | 5480                          | 65.1 |
| At some point >8%                | 2704                   | 32.1 | 1655                          | 19.7 |
| Missing                          | 573                    | 6.8  | 1281                          | 15.2 |
| Mean (SD)                        | 7.4                    | 1.6  | 7.1                           | 1.4  |
| <b>Comorbidities</b>             |                        |      |                               |      |
| Hypertension                     | 6052                   | 71.9 | 5511                          | 65.5 |

|                                                | DKD cohort<br>(N=8416) |      | Comparison cohort<br>(N=8416) |      |
|------------------------------------------------|------------------------|------|-------------------------------|------|
|                                                | n                      | %    | n                             | %    |
| <b>Age (years)</b>                             |                        |      |                               |      |
| Hyperlipaemia                                  | 2862                   | 34.0 | 2736                          | 32.5 |
| Heart failure                                  | 615                    | 7.3  | 329                           | 3.9  |
| IHD                                            | 1862                   | 22.1 | 1593                          | 18.9 |
| Atrial fibrillation                            | 1013                   | 12.0 | 594                           | 7.1  |
| Cerebrovascular disease                        | 923                    | 11.0 | 675                           | 8.0  |
| COPD                                           | 820                    | 9.7  | 646                           | 7.7  |
| Peptic ulcer disease                           | 688                    | 8.2  | 598                           | 7.1  |
| Pancreatic disease                             | 149                    | 1.8  | 134                           | 1.6  |
| Liver disorders                                | 402                    | 4.8  | 332                           | 3.9  |
| Cancer                                         | 1386                   | 16.5 | 1198                          | 14.2 |
| <b>GP visits*</b>                              |                        |      |                               |      |
| <12                                            | 1476                   | 17.5 | 2143                          | 25.5 |
| 12–23                                          | 3749                   | 44.5 | 4181                          | 49.7 |
| 24–35                                          | 1884                   | 22.4 | 1453                          | 17.3 |
| ≥36                                            | 1307                   | 15.5 | 639                           | 7.6  |
| <b>Referrals to secondary care*</b>            |                        |      |                               |      |
| None                                           | 1039                   | 12.3 | 1243                          | 14.8 |
| 1–6                                            | 4814                   | 57.2 | 5265                          | 62.6 |
| ≥7                                             | 2563                   | 30.5 | 1908                          | 22.7 |
| <b>≥1 hospitalisation*</b>                     | 1784                   | 21.2 | 1392                          | 16.5 |
| <b>Lowest eGFR (mL/min/1.73m<sup>2</sup>)*</b> |                        |      |                               |      |
| ≥90                                            | 1515                   | 18.0 | 1839                          | 21.9 |
| 60–89                                          | 3089                   | 36.7 | 4598                          | 54.6 |
| 45–59                                          | 2084                   | 24.8 | 878                           | 10.4 |
| 30–44                                          | 691                    | 8.2  | 241                           | 2.9  |
| 15–29                                          | 202                    | 2.4  | 61                            | 0.7  |
| <15                                            | 44                     |      | 3                             | 0.0  |
| Missing                                        | 791                    | 9.4  | 796                           | 9.5  |
| <i>mean (sd)</i>                               | 68.7                   | 22.0 | 77.6                          | 20.1 |
| <b>Medication use*</b>                         |                        |      |                               |      |
| ACEI/ARB                                       | 6395                   | 76.0 | 5099                          | 60.6 |
| MRA                                            | 330                    | 3.9  | 163                           | 1.9  |

\*In the year before study entry.

*Abbreviations:* ACE, angiotensin-converting enzyme; ARB, angiotensin receptor blocker; BMI, body mass index, COPD, chronic obstructive pulmonary disease; DKD, diabetic kidney disease; eGFR, estimated glomerular filtration rate; GP, general practitioner; IHD, ischaemic heart disease; MRA, mineralocorticoid receptor antagonist; SD, standard deviation



**Supplementary Table 13.** Hazard ratios (95% CI) for the association between antidiabetic medication and all-cause mortality among persons with type 2 diabetes (DKD and comparison cohorts).

| Type 2 diabetes medication* | N      | Deaths | Person-years | Incidence rate per 1000 person-years | Adjusted HR <sup>†</sup> (95% CI) | p     |
|-----------------------------|--------|--------|--------------|--------------------------------------|-----------------------------------|-------|
| Metformin                   | 11,147 | 1234   | 36,954       | 33.4                                 | 0.90 (0.83–0.99)                  | 0.03  |
| Sulphonylureas              | 5163   | 728    | 16,949       | 43.0                                 | 1.05 (0.95–1.15)                  | 0.34  |
| Insulin                     | 1024   | 151    | 2902         | 52.0                                 | 1.37 (1.15–1.63)                  | <0.01 |
| Glitazones                  | 1527   | 182    | 6189         | 29.4                                 | 0.98 (0.84–1.14)                  | 0.77  |
| Gliptins                    | 1339   | 84     | 3029         | 27.7                                 | 0.92 (0.73–1.15)                  | 0.46  |
| Meglitinides                | 57     | 7      | 221          | 31.6                                 | 0.95 (0.45–2.00)                  | 0.89  |
| GLP-1 receptor agonists     | 393    | 10     | 989          | 10.1                                 | 0.51 (0.27–0.95)                  | 0.03  |
| SGLT2 inhibitors            | 55     | 1      | 36           | 27.6                                 | 0.91 (0.13–6.48)                  | 0.92  |

\*In the year before study entry.

†Adjusted for all the variables in Table 1.

*Note:* Reference group is not having a prescription for the respective medication in the year before study entry.

*Abbreviations:* CI, confidence interval; DKD, diabetic kidney disease; GLP-1, glucagon-like peptide-1; HR, hazard ratio; SGLT2, sodium-glucose co-transporter-2

**Supplementary Table 14.** Incidence rates of stage 5 CKD/ESRD per 1000 person-years among the DKD cohort, and HRs ratios (95% CI) for associations between person characteristics and risk of stage 5 CKD/ESRD.

| Variable                     | N    | Incidence rate per 1000 person-years | Person-years | Stage 5 CKD/ESRD | HR* (95% CI)     | SHR* (95% CI)    |
|------------------------------|------|--------------------------------------|--------------|------------------|------------------|------------------|
| <b>Smoking</b>               |      |                                      |              |                  |                  |                  |
| Non-smoker                   | 2856 | 7.10                                 | 10,280       | 73               | 1.0 (reference)  | 1.0 (reference)  |
| Smoker                       | 1312 | 4.90                                 | 4286         | 21               | 0.77 (0.46–1.27) | 0.70 (0.42–1.15) |
| Ex-smoker                    | 4156 | 7.00                                 | 15,282       | 107              | 0.88 (0.64–1.20) | 0.90 (0.65–1.24) |
| Missing                      | 851  | 13.65                                | 879          | 12               | 1.95 (1.03–3.71) | 0.90 (0.48–1.71) |
| <b>Alcohol (units/week)</b>  |      |                                      |              |                  |                  |                  |
| Non-drinker                  | 2141 | 7.42                                 | 7011         | 52               | 1.0 (reference)  | 1.0 (reference)  |
| 1–2                          | 3017 | 7.40                                 | 9730         | 72               | 1.17 (0.81–1.70) | 1.16 (0.79–1.71) |
| 3–15                         | 2214 | 6.17                                 | 7620         | 47               | 1.03 (0.68–1.56) | 1.03 (0.68–1.56) |
| 16–24                        | 446  | 5.05                                 | 1583         | 8                | 1.01 (0.47–2.18) | 1.00 (0.46–2.17) |
| ≥25                          | 561  | 8.41                                 | 1902         | 16               | 1.85 (1.02–3.36) | 1.80 (0.98–3.30) |
| Missing                      | 796  | 6.24                                 | 2883         | 18               | 0.93 (0.54–1.61) | 0.92 (0.52–1.62) |
| <b>Further comorbidities</b> |      |                                      |              |                  |                  |                  |
| Cerebrovascular disease      | 1038 | 9.83                                 | 3,154        | 31               | 1.09 (0.74–1.61) | 1.04 (0.71–1.52) |
| Atrial fibrillation          | 1145 | 7.99                                 | 3253         | 26               | 0.71 (0.46–1.12) | 0.70 (0.45–1.09) |
| COPD                         | 891  | 6.95                                 | 2447         | 17               | 0.75 (0.45–1.25) | 0.67 (0.40–1.12) |
| Peptic ulcer disease         | 745  | 9.67                                 | 2274         | 22               | 1.13 (0.72–1.79) | 1.15 (0.73–1.82) |
| Pancreatic disease           | 165  | 8.40                                 | 476          | 4                | 1.02 (0.37–2.79) | 0.94 (0.33–2.71) |
| Liver disorders              | 433  | 9.18                                 | 1199         | 11               | 1.37 (0.73–2.58) | 1.36 (0.71–2.58) |

\*Adjusted for all the other variables in the table.

†In the year before study entry.

Abbreviations: CI, confidence interval, CeVD, cerebrovascular disease; CKD, chronic kidney disease; COPD, chronic obstructive pulmonary disease; HR, hazard ratio; SHR, sub-distribution hazard ratio

**Supplementary Table 15.** Incidence rates of stage 5 CKD/ESRD per 1000 person-years among the DKD cohort, and HRs (95% CI) for associations between BMI and risk of stage 5 CKD/ESRD.

| <b>BMI (kg/m<sup>2</sup>)</b> | <b>N</b> | <b>Incidence rate per 1000 person-years</b> | <b>Person-years</b> | <b>Stage 5 CKD/ESRD, n</b> | <b>Adjusted HR (95% CI)</b> | <b>Adjusted SHR (95% CI)</b> |
|-------------------------------|----------|---------------------------------------------|---------------------|----------------------------|-----------------------------|------------------------------|
| <20                           | 148      | 17.75                                       | 394                 | 7                          | 1.49 (0.65–3.41)            | 1.41 (0.64–3.13)             |
| 20–24                         | 1195     | 11.62                                       | 3614                | 42                         | 1.0 (reference)             | 1.0 (reference)              |
| 25–29                         | 2941     | 5.90                                        | 10,005              | 59                         | 0.58 (0.39–0.88)            | 0.61 (0.40–0.93)             |
| 30–34                         | 2531     | 6.98                                        | 8743                | 61                         | 0.66 (0.44–1.01)            | 0.70 (0.46–1.08)             |
| 35–39                         | 1384     | 6.02                                        | 4649                | 28                         | 0.65 (0.39–1.08)            | 0.68 (0.41–1.12)             |
| ≥40                           | 920      | 4.81                                        | 3119                | 15                         | 0.55 (0.29–1.03)            | 0.55 (0.29–1.05)             |
| Missing                       | 56       | 4.92                                        | 203                 | 1                          | 0.34 (0.05–2.58)            | 0.32 (0.05–2.06)             |

\*Adjusted for all the other variables in the table.

†In the year before study entry.

Abbreviations: CI, confidence interval; HR, hazard ratio; SHR, sub-distribution hazard ratio

**Supplementary Table 16.** Incidence rates of stage 5 CKD/ESRD per 1000 person-years among the DKD cohort, and HR (95% CI) for associations between person characteristics and risk of stage 5 CKD/ESRD among males.

| Variable                                                  | N    | Incidence rate per 1000 person-years | Person-years | Stage 5 CKD/ESRD | HR* (95% CI)      | SHR* (95% CI)     |
|-----------------------------------------------------------|------|--------------------------------------|--------------|------------------|-------------------|-------------------|
| <b>Age (years)</b>                                        |      |                                      |              |                  |                   |                   |
| <40                                                       | 109  | 0                                    | 408          | 0                | –                 | –                 |
| 40–49                                                     | 418  | 5.04                                 | 1589         | 8                | 1.0 (reference)   | 1.0 (reference)   |
| 50–64                                                     | 1719 | 5.55                                 | 6129         | 34               | 0.58 (0.25–1.31)  | 0.59 (0.24–1.43)  |
| 65–74                                                     | 1918 | 6.86                                 | 6558         | 45               | 0.54 (0.23–1.25)  | 0.52 (0.20–1.33)  |
| 75–89                                                     | 1580 | 9.71                                 | 4430         | 43               | 0.60 (0.25–1.45)  | 0.48 (0.18–1.26)  |
| <b>BMI (kg/m<sup>2</sup>)</b>                             |      |                                      |              |                  |                   |                   |
| <20                                                       | 54   | 5.79                                 | 173          | 1                | 0.33 (0.04–2.56)  | 0.37 (0.05–2.51)  |
| 20–24                                                     | 729  | 12.74                                | 2119         | 27               | 1.0 (reference)   | 1.0 (reference)   |
| 25–29                                                     | 1960 | 5.70                                 | 6672         | 38               | 0.57 (0.34–0.96)  | 0.62 (0.36–1.08)  |
| ≥30                                                       | 2970 | 6.38                                 | 10031        | 64               | 0.66 (0.40–1.09)  | 0.75 (0.45–1.25)  |
| Missing                                                   | 31   | 0                                    | 119          | 0                | –                 | –                 |
| <b>Townsend index (quintile)</b>                          |      |                                      |              |                  |                   |                   |
| 1st (least deprivation)                                   | 1126 | 5.01                                 | 3795         | 19               | 1.0 (reference)   | 1.0 (reference)   |
| 2nd                                                       | 1212 | 5.69                                 | 3867         | 22               | 0.94 (0.49–1.78)  | 0.90 (0.47–1.73)  |
| 3rd                                                       | 1187 | 6.14                                 | 4069         | 25               | 1.34 (0.73–2.45)  | 1.25 (0.67–2.31)  |
| 4th                                                       | 1169 | 8.62                                 | 3942         | 34               | 1.78 (1.00–3.18)  | 1.60 (0.90–2.84)  |
| 5th (most deprivation)                                    | 889  | 8.62                                 | 2899         | 25               | 2.18 (1.18–4.06)  | 1.94 (1.05–3.57)  |
| Missing                                                   | 161  | 9.22                                 | 542          | 5                | 1.68 (0.60–4.66)  | 1.71 (0.66–4.43)  |
| <b>Glycemic control quality<sup>†</sup></b>               |      |                                      |              |                  |                   |                   |
| Always ≤8%                                                | 3469 | 6.83                                 | 11566        | 79               | 1.0 (reference)   | 1.0 (reference)   |
| At some point >8%                                         | 1921 | 5.58                                 | 6096         | 34               | 0.99 (0.63–1.55)  | 0.96 (0.61–1.53)  |
| Missing                                                   | 354  | 11.71                                | 1452         | 17               | 1.85 (1.05–3.26)  | 1.64 (0.91–2.95)  |
| <b>Comorbidities</b>                                      |      |                                      |              |                  |                   |                   |
| Hypertension                                              | 4105 | 7.38                                 | 13684        | 101              | 1.12 (0.72–1.76)  | 1.11 (0.70–1.78)  |
| Hyperlipaemia                                             | 1943 | 5.12                                 | 6444         | 33               | 0.67 (0.44–1.01)  | 0.68 (0.45–1.03)  |
| Heart failure                                             | 475  | 13.85                                | 1227         | 17               | 1.45 (0.77–2.71)  | 1.37 (0.75–2.49)  |
| IHD                                                       | 1485 | 8.42                                 | 4752         | 40               | 1.12 (0.74–1.70)  | 1.11 (0.73–1.68)  |
| Cancer                                                    | 929  | 15.46                                | 2523         | 39               | 2.24 (1.48–3.38)  | 1.92 (1.26–2.91)  |
| <b>Lowest eGFR (mL/min/1.73m<sup>2</sup>)<sup>†</sup></b> |      |                                      |              |                  |                   |                   |
| ≥90                                                       | 1052 | 1.42                                 | 3514         | 5                | 1.0 (reference)   | 1.0 (reference)   |
| 60–89                                                     | 2201 | 3.44                                 | 7258         | 25               | 2.64 (0.97–7.14)  | 2.63 (0.92–7.47)  |
| 45–59                                                     | 1423 | 9.71                                 | 5047         | 49               | 7.09 (2.64–19.10) | 6.88 (2.43–19.45) |

| Variable                                              | N    | Incidence rate per 1000 person-years | Person-years | Stage 5 CKD/ESRD | HR* (95% CI)         | SHR* (95% CI)        |
|-------------------------------------------------------|------|--------------------------------------|--------------|------------------|----------------------|----------------------|
| 30–44                                                 | 431  | 17.80                                | 1349         | 24               | 11.17 (3.93–31.74)   | 10.52 (3.58–30.95)   |
| 15–29                                                 | 102  | 74.57                                | 255          | 19               | 49.83 (16.80–147.76) | 43.85 (14.14–135.98) |
| <15                                                   | 0    | 0                                    | 0            | 0                |                      | –                    |
| Missing                                               | 535  | 4.73                                 | 1691         | 8                | 4.06 (1.27–12.97)    | 3.94 (1.21–12.88)    |
| <b>GP visits<sup>†</sup></b>                          |      |                                      |              |                  |                      |                      |
| <12                                                   | 1094 | 3.72                                 | 4035         | 15               | 1.0 (reference)      | 1.0 (reference)      |
| 12–23                                                 | 2590 | 5.34                                 | 9173         | 49               | 1.19 (0.65–2.16)     | 1.19 (0.64–2.23)     |
| 24–35                                                 | 1228 | 9.55                                 | 3771         | 36               | 1.83 (0.94–3.54)     | 1.78 (0.89–3.57)     |
| ≥36                                                   | 832  | 14.06                                | 2134         | 30               | 2.54 (1.21–5.32)     | 2.26 (1.01–5.06)     |
| <b>Referrals to secondary care<sup>†</sup></b>        |      |                                      |              |                  |                      |                      |
| None                                                  | 694  | 6.54                                 | 2753         | 18               | 1.0 (reference)      | 1.0 (reference)      |
| 1–6                                                   | 3315 | 6.13                                 | 11581        | 71               | 1.00 (0.58–1.72)     | 0.99 (0.58–1.71)     |
| ≥7                                                    | 1735 | 8.58                                 | 4780         | 41               | 0.80 (0.42–1.52)     | 0.76 (0.38–1.51)     |
| <b>&gt;1 hospitalisation<sup>†</sup></b>              | 1243 | 10.70                                | 3552         | 38               | 1.14 (0.74–1.77)     | 1.13 (0.71–1.78)     |
| <b>Anti-diabetic medication<sup>†</sup></b>           |      |                                      |              |                  |                      |                      |
| None                                                  | 1051 | 5.03                                 | 3776         | 19               | 1.0 (reference)      | 1.0 (reference)      |
| 1 class of non-insulin glucose-lowering medication    | 2073 | 8.25                                 | 7148         | 59               | 1.94 (1.14–3.30)     | 1.96 (1.15–3.33)     |
| 2 classes of non-insulin glucose-lowering medication  | 1576 | 5.72                                 | 5249         | 30               | 1.45 (0.78–2.70)     | 1.43 (0.74–2.76)     |
| >2 classes of non-insulin glucose-lowering medication | 622  | 6.25                                 | 1759         | 11               | 2.10 (0.93–4.74)     | 2.04 (0.89–4.68)     |
| Insulin                                               | 422  | 9.31                                 | 1182         | 11               | 2.23 (0.99–5.01)     | 2.08 (0.93–4.65)     |
| <b>Other medication<sup>†</sup></b>                   |      |                                      |              |                  |                      |                      |
| ACEI/ARB                                              | 4485 | 7.13                                 | 14999        | 107              | 1.16 (0.70–1.90)     | 1.23 (0.74–2.04)     |
| MRA                                                   | 262  | 11.84                                | 591          | 7                | 0.82 (0.34–1.98)     | 0.69 (0.28–1.70)     |
| <b>Time from diabetes diagnosis to DKD (years)</b>    |      |                                      |              |                  |                      |                      |
| 0–1                                                   | 176  | 3.80                                 | 790          | 3                | 1.0 (reference)      | 1.0 (reference)      |
| 1–2                                                   | 534  | 7.88                                 | 2285         | 18               | 1.59 (0.46–5.48)     | 1.78 (0.49–6.43)     |
| 2–3                                                   | 670  | 8.79                                 | 2843         | 25               | 1.53 (0.45–5.22)     | 1.76 (0.51–6.06)     |
| 3–4                                                   | 698  | 7.66                                 | 2874         | 22               | 1.20 (0.35–4.16)     | 1.34 (0.39–4.67)     |
| 4–5                                                   | 645  | 5.16                                 | 2520         | 13               | 0.84 (0.23–3.07)     | 0.89 (0.24–3.31)     |
| >5                                                    | 3021 | 6.28                                 | 7802         | 49               | 1.08 (0.32–3.64)     | 1.10 (0.33–3.72)     |

\*Adjusted for all the other variables in the table. †In the year before study entry.

*Abbreviations:* ACE, angiotensin–converting enzyme; ARB, angiotensin receptor blocker; BMI, body mass index, CI, confidence interval, CKD, chronic kidney disease; CV, cardiovascular; DKD, diabetic kidney disease; eGFR, estimated glomerular filtration rate; ESRD, end–stage renal disease GP, general practitioner; HR, hazard ratio; IHD, ischaemic heart disease; MRA, mineralocorticoid receptor antagonist; SHR, sub–distribution hazard ratio

**Supplementary Table 17.** Incidence rates of stage 5 CKD/ESRD per 1000 person-years among the DKD cohort, and HR (95% CI) for associations between person characteristics and risk of stage 5 CKD/ESRD among females.

| Variable                                                  | N    | Incidence rate per 1000 person-years | Person-years | Stage 5 CKD/ESRD | HR* (95% CI)      | SHR* (95% CI)     |
|-----------------------------------------------------------|------|--------------------------------------|--------------|------------------|-------------------|-------------------|
| <b>Age (years)</b>                                        |      |                                      |              |                  |                   |                   |
| <40                                                       | 49   | 0                                    | 186          | 0                | –                 | –                 |
| 40–49                                                     | 217  | 2.46                                 | 813          | 2                | 1.0 (reference)   | 1.0 (reference)   |
| 50–64                                                     | 878  | 4.28                                 | 3275         | 14               | 1.27 (0.27–5.88)  | 1.20 (0.26–5.65)  |
| 65–74                                                     | 1110 | 9.13                                 | 3944         | 36               | 2.32 (0.51–10.59) | 2.13 (0.44–10.30) |
| 75–89                                                     | 1177 | 9.13                                 | 3396         | 31               | 1.80 (0.37–8.72)  | 1.50 (0.30–7.50)  |
| <b>BMI (kg/m<sup>2</sup>)</b>                             |      |                                      |              |                  |                   |                   |
| <20                                                       | 94   | 27.07                                | 222          | 6                | 3.06 (1.04–8.98)  | 2.50 (0.90–6.96)  |
| 20–24                                                     | 466  | 10.03                                | 1495         | 15               | 1.0 (reference)   | 1.0 (reference)   |
| 25–29                                                     | 981  | 6.30                                 | 3333         | 21               | 0.60 (0.30–1.21)  | 0.62 (0.30–1.29)  |
| ≥30                                                       | 1865 | 6.17                                 | 6480         | 40               | 0.65 (0.34–1.24)  | 0.67 (0.34–1.31)  |
| Missing                                                   | 25   | 11.91                                | 84           | 1                | 0.67 (0.07–6.01)  | 0.68 (0.09–5.13)  |
| <b>Townsend index (quintile)</b>                          |      |                                      |              |                  |                   |                   |
| 1st (least deprivation)                                   | 546  | 4.19                                 | 1669         | 7                | 1.0 (reference)   | 1.0 (reference)   |
| 2nd                                                       | 632  | 8.27                                 | 2178         | 18               | 1.95 (0.80–4.75)  | 2.08 (0.84–5.11)  |
| 3rd                                                       | 704  | 7.25                                 | 2346         | 17               | 1.72 (0.69–4.28)  | 1.77 (0.71–4.43)  |
| 4th                                                       | 792  | 8.76                                 | 2740         | 24               | 2.12 (0.89–5.05)  | 2.18 (0.92–5.13)  |
| 5th (most deprivation)                                    | 656  | 6.34                                 | 2366         | 15               | 1.47 (0.58–3.73)  | 1.61 (0.62–4.21)  |
| Missing                                                   | 101  | 6.33                                 | 316          | 2                | 1.63 (0.32–8.31)  | 1.75 (0.35–8.70)  |
| <b>Glycemic control quality<sup>†</sup></b>               |      |                                      |              |                  |                   |                   |
| Always ≤8%                                                | 2165 | 6.76                                 | 7253         | 49               | 1.0 (reference)   | 1.0 (reference)   |
| At some point >8%                                         | 1012 | 8.24                                 | 3275         | 27               | 1.39 (0.81–2.37)  | 1.34 (0.83–2.16)  |
| Missing                                                   | 254  | 6.45                                 | 1086         | 7                | 0.81 (0.35–1.91)  | 0.77 (0.32–1.82)  |
| <b>Comorbidities</b>                                      |      |                                      |              |                  |                   |                   |
| Hypertension                                              | 2504 | 7.67                                 | 8471         | 65               | 1.23 (0.69–2.18)  | 1.26 (0.71–2.24)  |
| Hyperlipaemia                                             | 1211 | 6.70                                 | 4180         | 28               | 0.97 (0.60–1.58)  | 0.98 (0.61–1.55)  |
| Heart failure                                             | 216  | 15.24                                | 591          | 9                | 1.43 (0.63–3.24)  | 1.32 (0.59–2.95)  |
| IHD                                                       | 620  | 10.50                                | 2000         | 21               | 1.23 (0.70–2.14)  | 1.21 (0.68–2.15)  |
| Cancer                                                    | 610  | 11.34                                | 1764         | 20               | 1.72 (1.01–2.92)  | 1.58 (0.91–2.73)  |
| <b>Lowest eGFR (mL/min/1.73m<sup>2</sup>)<sup>†</sup></b> |      |                                      |              |                  |                   |                   |
| ≥90                                                       | 542  | 1.70                                 | 1767         | 3                | 1.0 (reference)   | 1.0 (reference)   |
| 60–89                                                     | 1189 | 3.80                                 | 3947         | 15               | 1.63 (0.45–5.95)  | 1.62 (0.42–6.25)  |
| 45–59                                                     | 891  | 9.83                                 | 3357         | 33               | 3.64 (1.04–12.75) | 3.83 (1.03–14.26) |

| Variable                                              | N    | Incidence rate per 1000 person-years | Person-years | Stage 5 CKD/ESRD | HR* (95% CI)       | SHR* (95% CI)     |
|-------------------------------------------------------|------|--------------------------------------|--------------|------------------|--------------------|-------------------|
| 30–44                                                 | 365  | 13.17                                | 1139         | 15               | 4.77 (1.25–18.18)  | 4.32 (1.02–18.27) |
| 15–29                                                 | 122  | 28.02                                | 357          | 10               | 10.77 (2.67–43.43) | 9.64 (2.18–42.58) |
| <15                                                   | 0    | 0                                    | 0            | 0                |                    |                   |
| Missing                                               | 322  | 6.68                                 | 1048         | 7                | 3.25 (0.79–13.44)  | 3.37 (0.74–15.35) |
| <b>GP visits<sup>†</sup></b>                          |      |                                      |              |                  |                    |                   |
| <12                                                   | 521  | 3.08                                 | 1951         | 6                | 1.0 (reference)    | 1.0 (reference)   |
| 12–23                                                 | 1495 | 7.31                                 | 5336         | 39               | 2.53 (1.04–6.16)   | 2.47 (1.06–5.73)  |
| 24–35                                                 | 839  | 8.46                                 | 2720         | 23               | 2.24 (0.85–5.95)   | 2.19 (0.85–5.64)  |
| ≥36                                                   | 576  | 9.33                                 | 1608         | 15               | 2.06 (0.69–6.12)   | 1.84 (0.59–5.70)  |
| <b>Referrals to secondary care<sup>†</sup></b>        |      |                                      |              |                  |                    |                   |
| None                                                  | 427  | 8.98                                 | 1783         | 16               | 1.0 (reference)    | 1.0 (reference)   |
| 1–6                                                   | 1937 | 5.57                                 | 6641         | 37               | 0.51 (0.27–0.97)   | 0.50 (0.25–1.00)  |
| ≥7                                                    | 1067 | 9.40                                 | 3191         | 30               | 0.73 (0.35–1.51)   | 0.70 (0.33–1.49)  |
| <b>&gt;1 hospitalisation<sup>†</sup></b>              | 697  | 9.41                                 | 2126         | 20               | 1.09 (0.62–1.94)   | 1.02 (0.57–1.82)  |
| <b>Anti-diabetic medication<sup>†</sup></b>           |      |                                      |              |                  |                    |                   |
| None                                                  | 668  | 6.06                                 | 2312         | 14               | 1.0 (reference)    | 1.0 (reference)   |
| 1 class of non-insulin glucose-lowering medication    | 1321 | 6.63                                 | 4377         | 29               | 1.30 (0.66–2.57)   | 1.34 (0.68–2.64)  |
| 2 classes of non-insulin glucose-lowering medication  | 899  | 8.41                                 | 3211         | 27               | 1.61 (0.77–3.34)   | 1.77 (0.87–3.61)  |
| >2 classes of non-insulin glucose-lowering medication | 274  | 6.57                                 | 914          | 6                | 1.60 (0.55–4.65)   | 1.74 (0.63–4.77)  |
| Insulin                                               | 269  | 8.75                                 | 800          | 7                | 1.29 (0.45–3.74)   | 1.42 (0.51–4.01)  |
| <b>Other medication<sup>†</sup></b>                   |      |                                      |              |                  |                    |                   |
| ACEI/ARB                                              | 2493 | 7.53                                 | 8636         | 65               | 1.06 (0.60–1.90)   | 1.11 (0.63–1.96)  |
| MRA                                                   | 108  | 17.74                                | 282          | 5                | 1.26 (0.44–3.60)   | 1.28 (0.47–3.50)  |
| <b>Time from diabetes diagnosis to DKD (years)</b>    |      |                                      |              |                  |                    |                   |
| 0–1                                                   | 109  | 12.69                                | 473          | 6                | 1.0 (reference)    | 1.0 (reference)   |
| 1–2                                                   | 277  | 5.25                                 | 1143         | 6                | 0.46 (0.14–1.56)   | 0.41 (0.12–1.39)  |
| 2–3                                                   | 359  | 7.16                                 | 1677         | 12               | 0.53 (0.17–1.61)   | 0.50 (0.16–1.53)  |
| 3–4                                                   | 419  | 7.12                                 | 1686         | 12               | 0.60 (0.20–1.82)   | 0.48 (0.17–1.34)  |
| 4–5                                                   | 415  | 8.80                                 | 1591         | 14               | 0.57 (0.18–1.74)   | 0.50 (0.17–1.47)  |
| >5                                                    | 1852 | 6.54                                 | 5045         | 33               | 0.48 (0.17–1.40)   | 0.41 (0.15–1.10)  |

\*Adjusted for all the other variables in the table. †In the year before study entry.



*Abbreviations:* ACE, angiotensin–converting enzyme; ARB, angiotensin receptor blocker; BMI, body mass index, CI, confidence interval, CKD, chronic kidney disease; CV, cardiovascular; DKD, diabetic kidney disease; eGFR, estimated glomerular filtration rate; ESRD, end–stage renal disease GP, general practitioner; HR, hazard ratio; IHD, ischaemic heart disease; MRA, mineralocorticoid receptor antagonist; SHR, sub–distribution hazard ratio

**Supplementary Table 18.** Incidence rates of stage 5 CKD/ESRD per 1000 person-years among the DKD cohort, and HRs ratios (95% CI) for associations between person characteristics and risk of stage 5 CKD/ESRD (adjusted for history of anaemia).

| Variable                                                  | N    | Incidence rate per 1000 person-years | Person-years | Stage 5 CKD/ESRD | HR* (95% CI)     | SHR* (95% CI)    |
|-----------------------------------------------------------|------|--------------------------------------|--------------|------------------|------------------|------------------|
| <b>Age (years)</b>                                        |      |                                      |              |                  |                  |                  |
| <40                                                       | 158  | 0                                    | 594          | 0                |                  |                  |
| 40–49                                                     | 635  | 4.16                                 | 2402         | 10               | 1.0 (reference)  | 1.0 (reference)  |
| 50–64                                                     | 2597 | 5.1                                  | 9404         | 48               | 0.77 (0.38–1.56) | 0.76 (0.36–1.62) |
| 65–74                                                     | 3028 | 7.71                                 | 10,502       | 81               | 0.88 (0.43–1.80) | 0.82 (0.37–1.79) |
| 75–89                                                     | 2757 | 9.45                                 | 7827         | 74               | 0.84 (0.40–1.79) | 0.68 (0.30–1.55) |
| <b>Sex</b>                                                |      |                                      |              |                  |                  |                  |
| Male                                                      | 5744 | 6.8                                  | 19,114       | 130              | 1.0 (reference)  | 1.0 (reference)  |
| Female                                                    | 3431 | 7.15                                 | 11,614       | 83               | 0.85 (0.63–1.16) | 0.9 (0.66–1.22)  |
| <b>BMI (kg/m<sup>2</sup>)</b>                             |      |                                      |              |                  |                  |                  |
| <20                                                       | 148  | 17.75                                | 394          | 7                | 1.48 (0.65–3.39) | 1.41 (0.63–3.13) |
| 20–24                                                     | 1195 | 11.62                                | 3614         | 42               | 1.0 (reference)  | 1.0 (reference)  |
| 25–29                                                     | 2941 | 5.9                                  | 10,005       | 59               | 0.58 (0.39–0.88) | 0.61 (0.40–0.93) |
| ≥30                                                       | 4835 | 6.3                                  | 16,511       | 104              | 0.64 (0.44–0.95) | 0.68 (0.46–1.00) |
| Missing                                                   | 56   | 4.92                                 | 203          | 1                | 0.34 (0.05–2.57) | 0.32 (0.05–2.03) |
| <b>Townsend index (quintile)</b>                          |      |                                      |              |                  |                  |                  |
| 1st (least deprivation)                                   | 1672 | 4.76                                 | 5464         | 26               | 1.0 (reference)  | 1.0 (reference)  |
| 2nd                                                       | 1844 | 6.62                                 | 6044         | 40               | 1.33 (0.81–2.20) | 1.34 (0.81–2.20) |
| 3rd                                                       | 1891 | 6.55                                 | 6415         | 42               | 1.49 (0.91–2.44) | 1.43 (0.87–2.35) |
| 4th                                                       | 1961 | 8.68                                 | 6682         | 58               | 1.95 (1.21–3.12) | 1.88 (1.18–2.99) |
| 5th (most deprivation)                                    | 1545 | 7.6                                  | 5265         | 40               | 1.76 (1.06–2.93) | 1.71 (1.03–2.84) |
| Missing                                                   | 262  | 8.15                                 | 859          | 7                | 1.79 (0.76–4.18) | 1.84 (0.80–4.23) |
| <b>Glycemic control quality<sup>†</sup></b>               |      |                                      |              |                  |                  |                  |
| Always ≤8%                                                | 5634 | 6.8                                  | 18,819       | 128              | 1.0 (reference)  | 1.0 (reference)  |
| At some point >8%                                         | 2933 | 6.51                                 | 9371         | 61               | 1.07 (0.76–1.51) | 1.06 (0.75–1.49) |
| Missing                                                   | 608  | 9.46                                 | 2538         | 24               | 1.31 (0.82–2.08) | 1.22 (0.75–1.96) |
| <b>Comorbidities</b>                                      |      |                                      |              |                  |                  |                  |
| Hypertension                                              | 6609 | 7.49                                 | 22,155       | 166              | 1.21 (0.85–1.72) | 1.22 (0.86–1.74) |
| Hyperlipaemia                                             | 3154 | 5.74                                 | 10,623       | 61               | 0.76 (0.56–1.03) | 0.77 (0.57–1.04) |
| Heart failure                                             | 691  | 14.3                                 | 1818         | 26               | 1.50 (0.92–2.43) | 1.37 (0.86–2.20) |
| IHD                                                       | 2105 | 9.03                                 | 6753         | 61               | 1.17 (0.84–1.62) | 1.14 (0.82–1.59) |
| Cancer                                                    | 1539 | 13.76                                | 4287         | 59               | 1.98 (1.44–2.73) | 1.75 (1.27–2.42) |
| Anemia                                                    | 1074 | 10.4                                 | 3173         | 33               | 1.05 (0.71–1.55) | 1.04 (0.69–1.57) |
| <b>Lowest eGFR (mL/min/1.73m<sup>2</sup>)<sup>†</sup></b> |      |                                      |              |                  |                  |                  |
| ≥90                                                       | 1594 | 1.51                                 | 5281         | 8                | 1.0 (reference)  | 1.0 (reference)  |

| Variable                                              | N    | Incidence rate per 1000 person-years | Person-years | Stage 5 CKD/ESRD | HR* (95% CI)        | SHR* (95% CI)      |
|-------------------------------------------------------|------|--------------------------------------|--------------|------------------|---------------------|--------------------|
| 60–89                                                 | 3390 | 3.57                                 | 11,205       | 40               | 2.19 (1.00–4.79)    | 2.22 (0.98–5.02)   |
| 45–59                                                 | 2314 | 9.76                                 | 8404         | 82               | 5.45 (2.51–11.82)   | 5.59 (2.47–12.62)  |
| 30–44                                                 | 796  | 15.68                                | 2487         | 39               | 8.04 (3.54–18.25)   | 7.72 (3.28–18.13)  |
| 15–29                                                 | 224  | 47.41                                | 612          | 29               | 25.72 (11.04–59.92) | 23.22 (9.43–57.20) |
| <15                                                   | 0    | 0                                    | 0            | 0                | –                   | –                  |
| Missing                                               | 857  | 5.48                                 | 2740         | 15               | 3.92 (1.61–9.54)    | 3.88 (1.55–9.70)   |
| <b>GP visits<sup>†</sup></b>                          |      |                                      |              |                  |                     |                    |
| <12                                                   | 1615 | 3.51                                 | 5986         | 21               | 1.0 (reference)     | 1.0 (reference)    |
| 12–23                                                 | 4085 | 6.07                                 | 14,509       | 88               | 1.55 (0.95–2.52)    | 1.54 (0.94–2.50)   |
| 24–35                                                 | 2067 | 9.09                                 | 6491         | 59               | 1.96 (1.14–3.37)    | 1.89 (1.10–3.27)   |
| ≥36                                                   | 1408 | 12.03                                | 3742         | 45               | 2.22 (1.21–4.07)    | 1.94 (1.02–3.71)   |
| <b>Referrals to secondary care<sup>†</sup></b>        |      |                                      |              |                  |                     |                    |
| None                                                  | 1121 | 7.5                                  | 4536         | 34               | 1.0 (reference)     | 1.0 (reference)    |
| 1–6                                                   | 5252 | 5.93                                 | 18,221       | 108              | 0.77 (0.51–1.15)    | 0.75 (0.50–1.14)   |
| ≥7                                                    | 2802 | 8.91                                 | 7971         | 71               | 0.75 (0.46–1.21)    | 0.72 (0.43–1.20)   |
| >1 hospitalisation <sup>†</sup>                       | 1940 | 10.21                                | 5678         | 58               | 1.13 (0.80–1.59)    | 1.09 (0.76–1.56)   |
| <b>Anti-diabetic medication<sup>†</sup></b>           |      |                                      |              |                  |                     |                    |
| None                                                  | 1719 | 5.42                                 | 6088         | 33               | 1.0 (reference)     | 1.0 (reference)    |
| 1 class of non-insulin glucose-lowering medication    | 3394 | 7.64                                 | 11,525       | 88               | 1.80 (1.19–2.71)    | 1.82 (1.20–2.74)   |
| 2 classes of non-insulin glucose-lowering medication  | 2475 | 6.74                                 | 8460         | 57               | 1.65 (1.04–2.63)    | 1.72 (1.07–2.76)   |
| >2 classes of non-insulin glucose-lowering medication | 896  | 6.36                                 | 2673         | 17               | 2.09 (1.10–3.96)    | 2.13 (1.13–4.01)   |
| Insulin                                               | 691  | 9.08                                 | 1982         | 18               | 1.99 (1.06–3.74)    | 1.96 (1.07–3.57)   |
| <b>Other medication<sup>†</sup></b>                   |      |                                      |              |                  |                     |                    |
| ACEI/ARB                                              | 6978 | 7.28                                 | 23,635       | 172              | 1.06 (0.73–1.53)    | 1.12 (0.77–1.62)   |
| MRA                                                   | 370  | 13.75                                | 873          | 12               | 0.94 (0.49–1.81)    | 0.84 (0.43–1.65)   |
| <b>Time from diabetes diagnosis to DKD (years)</b>    |      |                                      |              |                  |                     |                    |
| 0–1                                                   | 285  | 7.13                                 | 1263         | 9                | 1.0 (reference)     | 1.0 (reference)    |
| 1–2                                                   | 811  | 7                                    | 3428         | 24               | 0.86 (0.39–1.89)    | 0.89 (0.41–1.96)   |
| 2–3                                                   | 1029 | 8.19                                 | 4520         | 37               | 0.92 (0.43–1.95)    | 0.96 (0.46–2.02)   |
| 3–4                                                   | 1117 | 7.46                                 | 4559         | 34               | 0.77 (0.36–1.66)    | 0.75 (0.35–1.58)   |
| 4–5                                                   | 1060 | 6.57                                 | 4110         | 27               | 0.66 (0.30–1.45)    | 0.64 (0.29–1.42)   |
| >5                                                    | 4873 | 6.38                                 | 12,847       | 82               | 0.66 (0.31–1.38)    | 0.61 (0.30–1.25)   |

\*Adjusted for all the other variables in the table.

†In the year before study entry.

*Abbreviations:* ACE, angiotensin–converting enzyme; ARB, angiotensin receptor blocker; BMI, body mass index, CI, confidence interval, CKD, chronic kidney disease; CV, cardiovascular; DKD, diabetic kidney disease; eGFR, estimated glomerular filtration rate; ESRD, end–stage renal disease GP, general practitioner; HR, hazard ratio; IHD, ischaemic heart disease; MRA, mineralocorticoid receptor antagonist; SHR, sub–distribution hazard ratio
